# Supplementary material for: Non-communicable diseases, infection and survival in a retrospective cohort of Indigenous and non-Indigenous adults in central Australia
Source: PubMed Central journal article supplement — BMJ Open. 2013 Jul 18;3(7):e003070. doi: 10.1136/bmjopen-2013-003070 (PMC3717469; doi:10.1136/bmjopen-2013-003070), 2013-07-18
Supplement: bmjopen-2013-003070.draft_revisions.pdf [file bmjopen-2013-003070.draft_revisions.pdf]

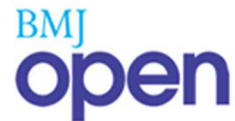

**Non-communicable diseases and infection in an Indigenous Australian population: increased risk during a rapid epidemiological transition**

|                                 |                                                                                                                                                                                                                                                                                                                                                         |
|---------------------------------|---------------------------------------------------------------------------------------------------------------------------------------------------------------------------------------------------------------------------------------------------------------------------------------------------------------------------------------------------------|
| Journal:                        | <i>BMJ Open</i>                                                                                                                                                                                                                                                                                                                                         |
| Manuscript ID:                  | bmjopen-2013-003070                                                                                                                                                                                                                                                                                                                                     |
| Article Type:                   | Research                                                                                                                                                                                                                                                                                                                                                |
| Date Submitted by the Author:   | 17-Apr-2013                                                                                                                                                                                                                                                                                                                                             |
| Complete List of Authors:       | Einsiedel, Lloyd; Flinders University, Northern Territory Rural Clinical School<br>Fernandes, Liselle; Flinders University, NTRCS<br>Joseph, Sheela; Flinders University, NTRCS<br>Brown, Alex; Baker IDI Heart and Diabetes Institute, Centre for Indigenous Vascular and Diabetes Research<br>Woodman, Richard; Flinders University, General Practice |
| <b>Primary Subject Heading</b>: | Infectious diseases                                                                                                                                                                                                                                                                                                                                     |
| Secondary Subject Heading:      | Public health, Global health                                                                                                                                                                                                                                                                                                                            |
| Keywords:                       | INFECTIOUS DISEASES, Public health < INFECTIOUS DISEASES, Epidemiology < INFECTIOUS DISEASES, MICROBIOLOGY, Diabetes & endocrinology < INTERNAL MEDICINE, Nephrology < INTERNAL MEDICINE                                                                                                                                                                |
|                                 |                                                                                                                                                                                                                                                                                                                                                         |

SCHOLARONE™  
Manuscripts

Only

1  
2  
3  
4 2 *Non-communicable diseases and infection in an Indigenous Australian*  
5  
6 3 *population: increased risk during a rapid epidemiological transition*  
7  
8  
9 4

10  
11 5 Lloyd Einsiedel<sup>1</sup>, Liselle Fernandes<sup>1</sup>, Sheela Joseph<sup>1</sup>, Alex Brown<sup>2</sup> and  
12  
13  
14 6 Richard J Woodman<sup>1</sup>  
15  
16  
17 7  
18  
19  
20 8  
21  
22

23 9 (1) Flinders University/Northern Territory Rural Clinical School, Alice Springs Hospital, 0870,  
24  
25 10 Northern Territory, Australia  
26  
27

28 11 (2) Head, Centre for Indigenous Vascular Research, Baker IDI Heart and Diabetes  
29  
30 12 Institute, Alice Springs Hospital, 0870, Northern Territory, Australia.  
31  
32  
33  
34 13  
35  
36  
37

38 14 § Corresponding author:  
39  
40

41 15 Lloyd Einsiedel. Alice Springs Hospital, Department of Medicine, Darwin, Northern  
42  
43 16 Territory, Australia. Tel: + 61 08 89519607, Fax: + 61 08 89538385, E-mail:  
44  
45 17 [lloyd.einsiedel@health.sa.gov.au](mailto:lloyd.einsiedel@health.sa.gov.au)  
46  
47  
48  
49 18

50  
51  
52 19 Running title: Infection risk in Indigenous Australians  
53  
54

55 20 Keywords: Epidemiologic transition, Infection, Indigenous Health, Australia  
56  
57  
58  
59  
60

1  
2  
3 2 Word count:  
4

5  
6 3 Abstract: 293  
7

8 4 Text: 3489  
9

10 5 References: 40  
11

12  
13  
14 6 Conflict-of-interest : None reported  
15

16  
17 7 Funding statement:  
18

19 8 This study received funding from the Northern Territory Rural Clinical School, which is  
20  
21 9 an initiative of the Australian Department of Health and Ageing.  
22

23  
24 10 Contributorship: LE designed the study, collected the data, assisted with statistical  
25  
26 11 analysis and prepared the manuscript, LF and SJ collected the data, AB assisted in  
27  
28 12 manuscript preparation and RW was responsible for statistical analysis and assisted in  
29  
30 13 manuscript preparation.  
31  
32

33 14 Data sharing: Data relate to Indigenous Australians and cannot be shared without specific  
34  
35 15 approval from the relevant Indigenous communities and the responsible HREC.  
36  
37 16 Obtaining such approval will require detail of all individuals seeking access and each  
38  
39 17 research project for which the inclusion of this data is proposed.  
40  
41  
42  
43  
44  
45  
46  
47  
48  
49  
50  
51  
52  
53  
54  
55  
56  
57  
58  
59  
60

1  
2  
3 **Abstract**  
4

5 Objectives: We hypothesize that rising prevalence rates of non-communicable diseases  
6 (NCDs) increases infection risk and worsens outcomes among socially disadvantaged  
7  
8 Indigenous Australians undergoing a rapid epidemiological transition.  
9

10 Design: Pathology, imaging and discharge morbidity codes were retrospectively reviewed  
11 for a period of 5 years prior to admission with a blood stream infection (BSI), 1st January  
12 2003 to 30th June 2007.  
13

14 Participants: 558 Indigenous and 55 non-Indigenous community residents of central  
15  
16 Australia.  
17

18 Outcome measures: The effects of NCDs on risk of infection and death were determined  
19 after stratifying by ethnicity.  
20

21 Results: Mean annual BSI incidence rates were far higher among Indigenous residents  
22 (Indigenous, 970 per 100,000; non-Indigenous, 48 per 100,000 person-years; IRR=20.33;  
23 95% CI=20.31-20.35,  $p<0.001$ ). Indigenous patients were also more likely to have  
24 previous bacterial infections (68.7% versus 34.6%; respectively,  $p<0.001$ ), diabetes  
25 (44.3% versus 20.0%;  $p<0.001$ ), harmful alcohol consumption (37.0% versus 12.7%;  
26  $p<0.001$ ) and other communicable diseases (HTLV-1, 45.2%; strongyloidiasis, 36.1%;  
27 HBV, 12.9%). Among Indigenous patients, diabetes increased odds of current  
28 *Staphylococcus aureus* BSI (OR=1.6, 95% CI=1.0-2.5) and prior skin infections (adjusted  
29 OR=2.1, 95% CI=1.4-3.3). Harmful alcohol consumption increased odds of current  
30 *Streptococcus pneumoniae* BSI (OR=1.57, 95% CI=1.02-2.40) and of previous BSI  
31 (OR=1.7, 95% CI=1.1-2.5), skin infection (OR=1.7, 95% CI=1.1-2.6) or pneumonia  
32 (OR=4.3, 95% CI=2.8-6.7). Twenty-six percent of Indigenous patients died at a mean  
33  
34  
35  
36  
37  
38  
39  
40  
41  
42  
43  
44  
45  
46  
47  
48  
49  
50  
51  
52  
53  
54  
55  
56  
57  
58  
59  
60

1  
2  
3 2 (SD) age of 47±15 years. Complications of diabetes and harmful alcohol consumption  
4  
5  
6 3 predicted 28-day mortality (non-rheumatic heart disease, HR=2.9; 95% CI=1.4-6.2;  
7  
8 4 chronic renal failure, HR=2.6, 95%CI=1.0-6.5; chronic liver disease, HR=3.3,  
9  
10 5 95%CI=1.6-6.7).  
11  
12 6 Conclusion: In a socially disadvantaged population undergoing a rapid epidemiologic  
13  
14 7 transition, NCDs further increase risk of infection and BSI related mortality. Complex  
15  
16 8 interactions between communicable diseases and NCDs demand an integrated approach  
17  
18 9 to management, which must include the empowerment of affected populations to promote  
19  
20 10 behavioural change.  
21  
22  
23  
24  
25  
26  
27  
28  
29  
30  
31  
32  
33  
34  
35  
36  
37  
38  
39  
40  
41  
42  
43  
44  
45  
46  
47  
48  
49  
50  
51  
52  
53  
54  
55  
56  
57  
58  
59  
60

## Article Summary

### Article Focus

- Remote dwelling, Indigenous Australians are undergoing a rapid epidemiological transition, which is accompanied by a rapidly rising burden of non-communicable diseases (NCDs).
- In this setting of social disadvantage and frequent pathogen exposure, NCDs may increase risk of infection and infection-related death.

### Key Messages

- We reveal substantial racial disparities in rates of infection and of NCDs, reflecting the dual burden of disease that affects this Indigenous population.
- NCDs increased risk of blood stream infections with some pathogens, previous infections that provide portals of entry for life-threatening invasive disease and infection-related mortality.
- Complex interactions between communicable diseases and NCDs demand an integrated approach to management, which must include the empowerment of affected populations to promote behavioural change.

### Strengths and limitations of this study

- This hospital-based study only includes patients who were admitted with a blood stream infection. We are therefore unable to determine the actual risk of blood stream infections that is attributable to NCDs or to comment on background rates of other infections, which might be treated in the community.
- The major strength of our study lies in the demography of the study population, which is served by a single hospital, and the extensive nature of the clinical

1  
2  
3 2 material on which our analysis is based.  
4  
5  
6 3  
7  
8  
9  
10  
11  
12  
13  
14  
15  
16  
17  
18  
19  
20  
21  
22  
23  
24  
25  
26  
27  
28  
29  
30  
31  
32  
33  
34  
35  
36  
37  
38  
39  
40  
41  
42  
43  
44  
45  
46  
47  
48  
49  
50  
51  
52  
53  
54  
55  
56  
57  
58  
59  
60

## 2 Introduction

3 Prevalence rates of non-communicable diseases (NCDs), such as diabetes, are rising  
4 rapidly in developing countries, adding to a pre-existing burden of infectious diseases in  
5 populations that are undergoing rapid demographic changes<sup>1,2</sup>. A similar burden of  
6 communicable diseases and NCDs affects marginalized Indigenous people living in  
7 poverty within developed countries<sup>3,4</sup>. Among Indigenous Australians, for example,  
8 NCDs are the major contributors to racial disparities in mortality and to a life expectancy  
9 that remains 17 years less than that of their non-Indigenous peers<sup>3</sup>. In central Australia,  
10 rising prevalence rates of NCDs affect an Indigenous population in which a high burden  
11 of infectious diseases persists. Incidence rates of sepsis<sup>5</sup>, blood stream infections<sup>6</sup> and  
12 childhood pneumonia, and prevalence rates of bronchiectasis<sup>7</sup> are the highest reported  
13 worldwide. Strongyloidiasis and chronic viral infections, such as with hepatitis B virus  
14 (HBV) and the Human T-Lymphotropic Virus 1 (HTLV-1), are also common<sup>6</sup>.  
15 Population-based infection-related mortality rates for Indigenous adults in central  
16 Australia therefore remain higher than those of some African countries prior to the  
17 current HIV pandemic and the median age of in-hospital death is only 48 years<sup>8</sup>.

18  
19 Interactions between communicable diseases and NCDs have been little studied;  
20 however, an appreciable effect of NCDs on infection rates is likely where pathogen  
21 exposure is frequent. Diabetes, for example, contributes to the risk of serious bacterial  
22 infections including *Streptococcus pneumoniae*<sup>9</sup> and *Staphylococcus aureus*<sup>10</sup>, which are  
23 common pathogens in overcrowded Indigenous Australian communities<sup>6</sup>. The NCD  
24 burden may therefore have a substantial impact on infection rates and outcomes where



1  
2  
3 2 these two epidemics coincide. Such an interaction could reverse health gains in  
4  
5 3 populations undergoing a rapid epidemiologic transition and exacerbate health  
6  
7 4 inequalities among disadvantaged subgroups within developed countries. The recent  
8  
9 5 description in New Zealand of an increasing divergence in infection-related  
10  
11 6 hospitalization rates according to social status is consistent with this possibility and  
12  
13 7 challenges health transition theory <sup>11</sup>.  
14  
15  
16  
17  
18  
19

20 9 Central Australia is well placed to study interactions between poverty, NCDs and  
21  
22 10 infectious diseases. Most Indigenous residents live in remote communities in conditions  
23  
24 11 of considerable socio-economic disadvantage, leaving only a minority within the major  
25  
26 12 regional township of Alice Springs. The latter have ready access to a well-resourced  
27  
28 13 medical facility, Alice Springs Hospital (ASH), which has sophisticated diagnostic  
29  
30 14 capabilities and provides specialist medical care to a region of 1,000,000 km<sup>2</sup>. Indigenous  
31  
32 15 residents of Alice Springs dwell in either overcrowded ‘town camps’, which have poor  
33  
34 16 amenities and limited refuse disposal, or are integrated with the majority of the non-  
35  
36 17 Indigenous population within the township’s suburbs. The Indigenous population of this  
37  
38 18 region also has among the highest blood stream infection incidence rates reported <sup>6</sup>.  
39  
40 19 Living conditions that increase the risk of pathogen exposure and high background rates  
41  
42 20 of focal infections, which provide portals of entry for bacterial invasion, are likely to  
43  
44 21 precede these life-threatening infections. Blood stream infection incidence rates therefore  
45  
46 22 provide measurable end-points to which environmental and host factors contribute.  
47  
48  
49  
50  
51  
52

53 23  
54  
55  
56  
57  
58  
59  
60

1  
2  
3 2 Here we report the infectious and non-communicable disease burden among community  
4  
5  
6 3 residents of central Australia who presented with a blood stream infection and determine  
7  
8 4 risk factors for infection and death after stratifying by ethnicity.  
9  
10 5  
11  
12  
13  
14  
15  
16  
17  
18  
19  
20  
21  
22  
23  
24  
25  
26  
27  
28  
29  
30  
31  
32  
33  
34  
35  
36  
37  
38  
39  
40  
41  
42  
43  
44  
45  
46  
47  
48  
49  
50  
51  
52  
53  
54  
55  
56  
57  
58  
59  
60

For peer review only

## 2 **Methods**

3 We conducted a retrospective review of all positive blood cultures collected from adult  
4 patients (age $\geq$ 15 years) admitted to ASH between 1<sup>st</sup> January 2001 and 31<sup>st</sup> June 2007. In  
5 July 2007 the Australian Federal Government suspended racial discrimination legislation  
6 and implemented an ‘Emergency Response’ that resulted in considerable uncertainty  
7 among Indigenous residents<sup>12</sup>. This raised concerns that the central Australian resident  
8 population could change as people moved interstate to escape these restrictions and no  
9 data was collected after this date. Data collected included organism, ethnicity, dates of  
10 birth, dates of death, indigenous status and place of residence. For patients who presented  
11 between 1<sup>st</sup> January 2003 and 31<sup>st</sup> June 2007 we also obtained ICD 10 morbidity codes  
12 and the results of microbiological and radiological investigations for each admission for 5  
13 years prior to the final BSI presentation. NCDs were derived from ICD-10 morbidity  
14 codes for diabetes, harmful alcohol consumption, >stage 2 chronic kidney disease,  
15 ischaemic heart disease, chronic liver disease and malignancy. Bronchiectasis was  
16 diagnosed radiologically using American College of Chest Physician criteria. Heart  
17 failure and valvular heart disease, including rheumatic heart disease (RHD), were  
18 diagnosed by trans-thoracic echocardiography. Ischaemic heart disease and cardiac  
19 failure were combined (‘non-rheumatic heart disease’) for statistical analysis.

## 21 *Definitions*

### 22 Residence

23 Place of residence was categorized as i) remote (>100 km from Alice Springs), ii) Alice  
24 Springs town camp and iii) urban (resident in Alice Springs, but not in a town camp).

1  
2  
3 2 Nursing home residents were included in calculations of BSI incidence rates, but  
4  
5 3 excluded from further analysis because the primary study objective was to determine risk  
6  
7  
8 4 factors for infection and death among community residents.  
9

10 5

## 11 6 Infections

12  
13 7 A blood culture from which a pathogen was isolated was defined as a 'BSI episode'.  
14  
15 8 Repeated culture of the same organism from blood culture was regarded as a separate  
16  
17 9 'episode' only if blood samples were drawn more than one month apart. Blood stream  
18  
19 10 infections were defined as community-acquired if a pathogen was isolated from blood  
20  
21 11 cultures drawn within 48 hours of admission and nosocomial if isolated from blood  
22  
23 12 cultures drawn after this time. Foci of infection were determined where possible from  
24  
25 13 ICD-10 morbidity codes in association with pathology and imaging results for each  
26  
27 14 admission for five years prior to the final BSI during the study period. A diagnosis of  
28  
29 15 pneumonia was made if there was radiological evidence of consolidation and this was  
30  
31 16 attributed to the pathogen isolated from blood cultures if the same organism was also  
32  
33 17 isolated from sputum or the blood culture isolate was an organism typically associated  
34  
35 18 with pneumonia, such as *Streptococcus pneumoniae*. Blood stream infections excluded  
36  
37 19 infections with potential contaminants including coagulase negative staphylococci,  
38  
39 20 bacillus spp., coryneforms and viridans streptococci unless grown from more than one  
40  
41 21 BC in a 24 hour period, as were *Acinetobacter sp* in the absence of an identifiable focus.  
42  
43  
44  
45  
46  
47  
48  
49  
50

51 22

52  
53 23 The study was approved by the Central Australian Human Research Ethics Committee.  
54

55 24  
56  
57  
58  
59  
60

1  
2  
3 2 *Statistics.*  
4

5  
6 3 All associations were assessed using data obtained for the final BSI admission within the  
7  
8 4 study period. Univariate analysis for categorical data was performed using Chi-squared  
9  
10 5 statistics and Fishers Exact where appropriate. Multivariate analysis was performed using  
11  
12 6 binary logistic regression. Short (28-day) and long-term survival analysis following the  
13  
14 7 final BSI episode in the study period was performed using the log-rank statistic for  
15  
16 8 univariate analysis and Cox regression for multivariate analysis. We calculated the annual  
17  
18 9 population-based incidence rates for 2001-2006 for the combined Alice Springs and  
19  
20 10 Anangu Pitjantjatjara Yankunyatjara (APY) land areas using the total number of BSI  
21  
22 11 presentations each year as the numerator. The denominator used was the estimated Adult  
23  
24 12 resident population obtained from Australian Bureau of Statistics 2006 census data for  
25  
26 13 the Alice Springs region combined with that of the neighbouring APY land areas. To  
27  
28 14 enable analysis according to place of residence this population was further divided into  
29  
30 15 that of i) the Alice Springs urban area excluding town camps (Indigenous 2898, non-  
31  
32 16 Indigenous 18471), ii) Alice Springs town camps, including that of a closely affiliated  
33  
34 17 neighbouring community (Indigenous, 1482), and iii) the Alice Springs rural area  
35  
36 18 (Indigenous, 8925; non-Indigenous, 2775), which included that for the APY land areas  
37  
38 19 (Indigenous= 1302, non-Indigenous=294).  
39  
40  
41  
42  
43  
44  
45  
46  
47  
48  
49  
50  
51  
52  
53  
54  
55  
56  
57  
58  
59  
60

2

### 3 **Results**

#### 4 *Patient demographics*

5 558 Indigenous and 55 non-indigenous adult community residents presented to ASH with  
6 a BSI between January 2003 and July 2007. Detailed demographic, clinical and  
7 microbiological data are described in Table 1. Indigenous patients were younger  
8 (Indigenous, 44.7±15.2; non-Indigenous, 57.5±21.1; p<0.001), more likely to be female  
9 (Indigenous, 58.1%; non-Indigenous, 41.8%; p<0.03) and to live in a town camp or  
10 remote community (Indigenous, 84.0%; non-Indigenous, 0; p<0.001). Non-  
11 communicable diseases including diabetes (Indigenous, 44.3%; non-Indigenous, 20.0%;  
12 p<0.001) and harmful alcohol consumption (Indigenous, 37.0%; non-Indigenous, 12.7%;  
13 p<0.001) were more common among Indigenous patients, while non-Indigenous patients  
14 were more likely to have ischaemic heart disease (Indigenous, 3.4%; non-Indigenous,  
15 31.6%; p<0.001), malignancy (Indigenous, 2.3%; non-Indigenous, 20.0%; p<0.001), to  
16 be receiving palliative care (Indigenous, 1.8%; non-Indigenous, 9.1%; p=0.001) and to  
17 have a history of intravenous drug use (Indigenous, 0; non-Indigenous, 5.5%; p=0.001).  
18 Forty-seven (8.4%) Indigenous and 5 (9.3%) non-indigenous BSI episodes were  
19 nosocomial (Table 1).

20

#### 21 *Population-based incidence rates 2001-2006*

22 The overall population-based BSI incidence rate for the Alice Springs area between 2001  
23 and 2006 was more than 20 times higher for Indigenous adults (970 per 100,000 person-  
24 years) than for non-Indigenous adults (48 per 100,000 person-years) (IRR=20.33; 95%

1  
2  
3  
4  
5  
6  
7  
8  
9  
10  
11  
12  
13  
14  
15  
16  
17  
18  
19  
20  
21  
22  
23  
24  
25  
26  
27  
28  
29  
30  
31  
32  
33  
34  
35  
36  
37  
38  
39  
40  
41  
42  
43  
44  
45  
46  
47  
48  
49  
50  
51  
52  
53  
54  
55  
56  
57  
58  
59  
60

2 CI, 20.31-20.35;  $p < 0.001$ ). Incidence rates for Indigenous town camp residents  
3 (4,042/100,000 person-years) were nearly 70 times higher than amongst non-Indigenous  
4 urban residents (60/100,000 person years) (IRR=67.9, 95% CI=67.8-67.9,  $p < 0.001$ ) and  
5 greater than 3 times that of either urban dwelling Indigenous adults (IRR=3.87, 95%  
6 CI=3.86-3.87,  $p < 0.001$ ) or those from remote communities (IRR=3.42, 95% CI=3.42-  
7 3.42,  $p < 0.001$ ) (Fig 1).

### 9 *Microbial Aetiology*

10 *Escherichia coli* and *S.aureus* were the most common pathogens causing BSI in both  
11 ethnic groups. Methicillin-resistant *S.aureus* (Indigenous, 53 (5.2%); non-Indigenous, 1  
12 (0.9%);  $p < 0.001$ ) and *S.pneumoniae* (Indigenous, 136 (13.2%); non-Indigenous, 8  
13 (5.9%);  $p < 0.001$ ) were more common among Indigenous patients (Table 1).

14  
15 Risk factors for BSI were determined for pathogens contributing more than 5% of all BSI  
16 episodes (Table 2). Diabetes was more common among Indigenous patients with a  
17 *S.aureus* BSI during their final BSI admission (20.2% versus 13.5%; OR=1.6 (1.04, 2.53;  
18  $p = 0.03$ ) (Table 2). In contrast, increased risk of *Streptococcus pneumoniae* BSI was  
19 associated with harmful alcohol consumption, while risk was reduced among patients  
20 with diabetes or those receiving haemodialysis (Table 2). Risk of BSI with other major  
21 pathogens (*E.coli*, *Klebsiella pneumoniae* or *Streptococcus pyogenes*) was not increased  
22 by any NCD (Table 2).

### 24 *Concurrent infections*

1  
2  
3 2 During their final BSI admission, Indigenous patients more often had an additional focus  
4  
5 3 of bacterial infection unrelated to the presenting BSI (Indigenous, n=69 (12.4%); non-  
6  
7 4 Indigenous, n=2 (3.6%); p=0.05) (Table 1). Infections with HTLV-1 (45.2%),  
8  
9 5 *S.stercoralis* (36.1%) and hepatitis B virus (anti-HBc, 62.5%; HBsAg, 12.9%) were also  
10  
11 6 more common among Indigenous patients (Table 1). *Sarcoptes scabiei* infestations were  
12  
13 7 only found in Indigenous patients (n=20; 4.0%) (Table 1).  
14  
15  
16  
17  
18  
19

### 20 *Previous infections*

21  
22 10 Excluding Indigenous patients who were at increased risk of recurrent infection  
23  
24 11 (haemodialysis, 83; bronchiectasis, 27) and those residing outside the Alice Springs  
25  
26 12 region who could not be followed-up (17), 296 of 431 (68.7%) Indigenous adults were  
27  
28 13 admitted with an acute infection during the five years prior to the final BSI admission  
29  
30 14 (Table 3). Significantly more common among Indigenous patients were pneumonia,  
31  
32 15 previous BSI, skin abscesses and wound infections (Table 3). Predisposing factors for  
33  
34 16 previous infection-related admissions included diabetes (previous skin infections),  
35  
36 17 harmful alcohol consumption (previous skin infections, pneumonia and BSI) and stage 3-  
37  
38 18 4 chronic kidney disease (any previous infection) (Table 4).  
39  
40  
41  
42  
43  
44

### 45 *Mortality*

#### 46 *28 day mortality*

47  
48 21 Overall 28-day mortality rates following a BSI were 11.7% and 11.4% for Indigenous  
49  
50 22 and non-Indigenous adults, respectively. Mortality rates among Indigenous patients were  
51  
52 23 highest for town camp residents (Fig 2) and varied according to pathogen. Among the  
53  
54 24  
55  
56  
57  
58  
59  
60



1  
2  
3 major pathogens causing BSI, most often fatal within the first 28 days was *K.pneumoniae*  
4 infection (40.0%) followed by *S.pneumoniae* (9.6%) *S.aureus* (8.0%), and *E.coli* (5.0%)  
5 ( $\chi^2=39.1$ , 4df;  $p<0.001$ ). Case fatality rates according to focus of infection were  
6 pneumonia (21.5%), pyelonephritis (8.9%) and skin infections (7.2%) ( $\chi^2=14.5$ , 3df;  
7  $p=0.002$ ).

### 8 *1. Community-acquired BSI amongst Indigenous patients*

9 Non-communicable diseases including chronic liver disease, non-rheumatic heart disease  
10 and chronic kidney disease were independent predictors of death (Table 5). Relative to  
11 patients with *E.coli* BSI, both *S.aureus* (HR=2.7, 95% CI=1.0-7.3;  $p=0.05$ ) and  
12 *S.pneumoniae* (HR=13.4, 95% CI=4.6-39.2;  $p<0.001$ ) were independently associated  
13 with an increased risk of death (Table 5).

### 14 *2. Nosocomial BSI amongst Indigenous patients*

15 In univariate analysis, place of residence ( $p=0.04$ ) was a predictor of short-term mortality.  
16 Within the first 28 days of admission, town camp residents were more likely to die (7 of  
17 11=64%) relative to other township (0 of 6=0.0%) or remote residents (14 of 30=46.7%)  
18 ( $p=0.039$ ). In multivariate analysis, place of residence remained an independent predictor  
19 ( $p<0.001$ ) and there was also an increased risk in those with non-rheumatic heart disease  
20 (HR=4.6, 95% CI=1.2,17.6;  $p=0.03$ ), a primary focus of pneumonia (HR=6.0, 95%  
21 CI=1.5, 24.5) and those with a previous BSI (HR=3.8, 95% CI=1.4, 10.3;  $p=0.008$ ).

### 22 *3. Nosocomial and Community acquired BSI amongst non-Indigenous patients*

1  
2  
3 2 In multivariate analysis, only non-rheumatic heart disease was an independent predictor  
4  
5 3 of short-term mortality amongst non-indigenous patients with a community-acquired BSI  
6  
7 4 (HR=12.5, 95% CI=1.0, 150.3;  $p<0.05$ ). There were 3 deaths within 28 days amongst 12  
8  
9 5 non-indigenous patients with non-rheumatic heart disease and 3 deaths amongst 56  
10  
11 6 patients without non-rheumatic heart disease. Numbers of nosocomial BSI amongst non-  
12  
13 7 indigenous patients were too few ( $n=5$ ) to attempt survival analysis.  
14  
15  
16  
17  
18  
19

### 20 9 *Long-term mortality*

21  
22 10 One-hundred and forty-five (26.0%) Indigenous and 15 (27.3%) non-Indigenous patients  
23  
24 11 died during the 2,056 years of follow-up at a mean  $\pm$  SD age of  $47\pm 15$  and  $68\pm 21$  years  
25  
26 12 ( $p<0.001$ ), respectively. Amongst Indigenous patients, mortality rates were again highest  
27  
28 13 amongst those from town camps (Log-rank  $\chi^2=5.05$ ,  $p=0.08$ ) (Fig 2).  
29  
30  
31  
32  
33

34 15 Among Indigenous patients, NCDs (non-rheumatic heart disease, chronic kidney disease,  
35  
36 16 chronic liver disease and malignancy) and BSI with *S.aureus* and *S.pneumoniae* were  
37  
38 17 independent predictors of long-term mortality following community-acquired BSI (Table  
39  
40 18 5). Residence in a town camp (town camp, 7 of 11; local residence, 0 of 6; remote areas,  
41  
42 19 14 of 30;  $\chi^2=6.5$ , 2df;  $p=0.04$ ) and BSI with *K.pneumoniae* BSI (HR=4.0, 95% CI=1.5,  
43  
44 20 11.2;  $p=0.007$ ) were the only univariate predictors of long-term mortality for nosocomial  
45  
46 21 BSI's amongst Indigenous patients.  
47  
48  
49  
50  
51  
52  
53  
54  
55  
56  
57  
58  
59  
60

1  
2  
3 2 There were no independent predictors of long-term mortality for non-Indigenous patients  
4  
5  
6 3 with community acquired infections and too few non-indigenous patients with  
7  
8 4 nosocomial BSI's (n=5) to perform long-term survival analysis.  
9  
10  
11 5  
12  
13  
14  
15  
16  
17  
18  
19  
20  
21  
22  
23  
24  
25  
26  
27  
28  
29  
30  
31  
32  
33  
34  
35  
36  
37  
38  
39  
40  
41  
42  
43  
44  
45  
46  
47  
48  
49  
50  
51  
52  
53  
54  
55  
56  
57  
58  
59  
60

2

### 3 Discussion

4 The Indigenous adult population of central Australia has among the highest BSI  
5 incidence rates worldwide. Relative to their non-Indigenous peers, rates for Indigenous  
6 adults were 20-fold higher overall and 70-fold higher among Indigenous town camp  
7 residents. A high burden of other infections, particularly repeated respiratory and skin  
8 infections, provide portals of entry for life-threatening invasive bacterial disease. Nearly  
9 70% of Indigenous patients required admission for an acute infection in the preceding  
10 five years, 24.4% experienced a prior BSI and a second unrelated bacterial infection was  
11 found in 12.4% of patients. Chronic viral and parasitic infections were also common.  
12 Among Indigenous adults who were tested, more than 60% had been infected with  
13 Hepatitis B virus, 13% remained HBsAg positive, nearly half were HTLV-1 seropositive  
14 and 36% were *S.stercoralis* seropositive. A similar burden of infection is experienced by  
15 Indigenous children amongst whom frequent co-infection with bacterial pathogens and  
16 parasites<sup>13</sup> contributes to 'failure-to-thrive'<sup>14</sup>. In our adult cohort, 26.0% of Indigenous  
17 patients died during the study period at a mean age of only 47 years. Although we were  
18 unable to attribute cause of death in the present study, 60% of Indigenous deaths at ASH  
19 are infection-related<sup>8</sup>.

20

21 High prevalence rates of non-communicable diseases were also found in our Indigenous  
22 cohort. These included diabetes, harmful alcohol consumption, chronic lung disease and  
23 end-stage kidney disease, all of which increase the risk of bacterial infection<sup>10,15, 9, 16</sup>.  
24 Invasive pneumococcal disease (IPD), for example, is three, 5.6 and 7-11 times more

1  
2  
3 2 common among patients with diabetes<sup>9</sup>, chronic lung disease<sup>9</sup> and alcohol dependence  
4  
5 3 <sup>9,17</sup>, respectively. Alcohol dependence and diabetes also increase risk of a BSI requiring  
6  
7  
8 4 intensive care nearly six-fold and haemodialysis increases risk several hundred fold <sup>16</sup>,  
9  
10 5 largely due to prolonged central venous access <sup>18</sup>. In the present study, rates of diabetes  
11  
12 6 among Indigenous adults were nearly three times reported background rates <sup>19</sup>. Diabetes  
13  
14 7 was associated with *S.aureus* BSI and with previous skin infections, but not with  
15  
16 8 *S.pneumoniae* BSI. Stage 3-4 chronic kidney disease, which is most often a complication  
17  
18 9 of diabetes in our patient population<sup>20</sup>, increased risk of previous infections. Harmful  
19  
20 10 alcohol consumption was associated with *S.pneumoniae* BSI and with previous  
21  
22 11 infections. Non-communicable diseases, including non-rheumatic heart disease, chronic  
23  
24 12 kidney disease and chronic liver disease, were also major predictors of mortality after a  
25  
26 13 BSI. However, once invasive infections were established, *S.aureus* and *S.pneumoniae*  
27  
28 14 predicted death independently of any underlying medical condition.  
29  
30  
31  
32  
33  
34  
35  
36  
37  
38  
39  
40  
41  
42  
43  
44  
45  
46  
47  
48  
49  
50  
51  
52  
53  
54  
55  
56  
57  
58  
59  
60

16 The present study has compared risk of non-communicable diseases among patients  
17 presenting with a BSI and cannot determine the population-based risks attributable to  
18 these conditions. Nevertheless, racial disparities in NCD prevalence are unlikely to fully  
19 account for the BSI incidence rate ratios reported here, nor do regional differences in  
20 their prevalence <sup>19</sup> explain IPD incidence rates that are twice as high among Indigenous  
21 residents of central Australia relative to those of the tropical north <sup>21</sup>. In the USA, higher  
22 IPD incidence rates among Black Americans <sup>9,22</sup> are more robustly associated with  
23 poverty than race <sup>22</sup>. An increased risk of *S.aureus* infection has also been reported  
24 among those of lower socio-economic position <sup>23-25</sup> and infection-related hospital

1  
2  
3 2 admissions in New Zealand are associated with social deprivation <sup>11</sup>. The socioeconomic  
4  
5 3 circumstances of Indigenous Australians are therefore likely to further increase the  
6  
7 4 infection risks associated with non-communicable diseases.  
8  
9 5

10 6 Social disadvantage predisposes to non-communicable diseases <sup>26, 27</sup> while increasing  
11 7 pathogen exposure and limiting opportunities to implement behavioural strategies that  
12 8 ameliorate risk <sup>28</sup>. In some Indigenous Australian communities the average number of  
13 9 people living per house is 17 <sup>29</sup> and non-functioning health hardware leads to  
14 10 environmental conditions that are detrimental to householders <sup>30</sup>. Overcrowded housing <sup>31</sup>  
15 11 and an inability to maintain adequate skin hygiene <sup>30</sup> contribute to high rates of  
16 12 pyoderma. More than 40% of Indigenous patients in the present study were previously  
17 13 admitted with skin infections, which are the most common primary focus for *S.aureus*  
18 14 bacteraemia in this population<sup>32</sup>. Scabies, a recognized cause of *S.aureus* and  
19 15 Streptococcal pyoderma <sup>31,33</sup>, affected 4% of our cohort. Streptococcal pyoderma  
20 16 underlies most cases of RHD in the Northern Territory <sup>29</sup> and this was confirmed  
21 17 echocardiographically in 2% of our Indigenous cohort. Similarly, the transmission of  
22 18 respiratory pathogens is promoted by household crowding <sup>34</sup> and nearly 40% of  
23 19 Indigenous adults were admitted previously with pneumonia. Environmental  
24 20 contamination <sup>14</sup>, inadequate sanitation and unhygienic food preparation areas <sup>30</sup>  
25 21 contribute to infection with enteric pathogens and *S.stercoralis*. The risks of complicated  
26 22 strongyloidiasis, crusted scabies <sup>35</sup> and bronchiectasis <sup>7</sup> are further increased by HTLV-1  
27 23 infection; however, no attempt has been made to control transmission of this virus among  
28 24 Indigenous Australians. Previously we have shown that Indigenous adults are less likely  
29  
30  
31  
32  
33  
34  
35  
36  
37  
38  
39  
40  
41  
42  
43  
44  
45  
46  
47  
48  
49  
50  
51  
52  
53  
54  
55  
56  
57  
58  
59  
60

1  
2  
3 2 to engage with a conventional medical paradigm<sup>36</sup> and delays in seeking care for  
4  
5 3 uncomplicated urinary tract infections may contribute to the very high rates of *E.coli* BSI  
6  
7  
8 4 reported here.  
9

10 5  
11  
12 6 The retrospective design of this study results in a number of limitations. Firstly, residents  
13  
14 7 of remote communities frequently stay in town camps and this is not recorded by ASH.  
15  
16 8 The effect of town camp residence may therefore be underestimated if large numbers of  
17  
18 9 remote residents acquire infection during these visits. Although foci of infection were  
19  
20 10 determined by reviewing the results of microbiology and imaging for each presentation,  
21  
22 11 these varied between patients according to the practice of the treating physician. The  
23  
24 12 number of patients with concurrent bacterial infections and medical conditions, such as  
25  
26 13 RHD, may therefore be underestimated. Similarly, seropositivity rates for infections, such  
27  
28 14 as HBV and HTLV-1, could only be determined for a subset of patients. A further  
29  
30 15 limitation is the identification of NCDs and previous infections using ICD-10 codes;  
31  
32 16 however, coding errors are unlikely to vary systematically according to ethnicity or place  
33  
34 17 of residence. Finally, the present study has demonstrated an increased risk of infection  
35  
36 18 and death associated with town camp residence. This occurred despite better access to  
37  
38 19 health care relative to remote residents and little difference in crude measures of  
39  
40 20 socioeconomic deprivation<sup>3</sup>. For community-acquired BSIs, risk of death was strongly  
41  
42 21 associated with NCDs; however, these conditions did not fully account for the increased  
43  
44 22 risk following a nosocomial BSI. Unmeasured socioeconomic factors might contribute to  
45  
46 23 increased mortality among town camp residents; however, recent research linking health  
47  
48 24 outcomes to perceived racism<sup>37</sup> may also be relevant to this marginalized population.  
49  
50  
51  
52  
53  
54  
55  
56  
57  
58  
59  
60

1  
2  
3 2  
4  
5 3 The disease burden among the Indigenous population of central Australia is similar to  
6  
7  
8 4 that of many developing countries where NCD prevalence rates are rising rapidly in a  
9  
10 5 setting of persistently high infection rates <sup>1,38</sup>. Recently, the validity of conventional  
11  
12 6 health transition theory has been challenged by findings that infection-related  
13  
14 7 hospitalization rates are increasing among the most socially disadvantaged community  
15  
16 8 members in a developed country <sup>11</sup>. The present study provides a possible explanation for  
17  
18 9 this observation and further suggests that, in contrast to the orderly epidemiological  
19  
20 10 transition envisaged by Omran (1971)<sup>39</sup>, life expectancy may fall where social  
21  
22 11 deprivation persists in the face of a rising prevalence of non-communicable diseases.  
23  
24  
25 12 High BSI incidence rates among Indigenous Australians were associated with a heavy  
26  
27 13 burden of other infections that provide portals of entry for invasive bacterial disease.  
28  
29  
30 14 Improving life expectancy in this setting will require public health initiatives to reduce  
31  
32 15 pathogen exposure in addition to controlling the burgeoning non-communicable disease  
33  
34 16 burden. Diabetes, harmful alcohol consumption and organ damage resulting from these  
35  
36 17 conditions increased both the likelihood of infection and the subsequent risk of death.  
37  
38 18 Both conditions are included in proposed international management strategies to control  
39  
40 19 the non-communicable disease crisis <sup>27</sup>. However, our findings also illustrate the  
41  
42 20 complexity of interactions between communicable and non-communicable diseases and  
43  
44 21 support calls for an integrated approach to management, which must include the  
45  
46 22 empowerment of affected populations to promote behavioural change <sup>40</sup>.  
47  
48  
49  
50  
51  
52  
53 23  
54  
55  
56  
57  
58  
59  
60



1  
2  
3 **2 Contributions:**  
4

5 LE designed the study, collected the data, assisted with statistical analysis and prepared  
6  
7  
8 the manuscript, LF and SJ collected the data, AB assisted in manuscript preparation and  
9  
10  
11 RW was responsible for statistical analysis and assisted in manuscript preparation.  
12  
13  
14  
15  
16  
17  
18  
19  
20  
21  
22  
23  
24  
25  
26  
27  
28  
29  
30  
31  
32  
33  
34  
35  
36  
37  
38  
39  
40  
41  
42  
43  
44  
45  
46  
47  
48  
49  
50  
51  
52  
53  
54  
55  
56  
57  
58  
59  
60

1  
2  
3 Table 1 Demographics and comorbidities for indigenous and non-indigenous BSI patients  
4  
5  
6 2003-2007.  
7

|                                    | <b>Indigenous<br/>(n=558)</b> | <b>Non-<br/>indigenous<br/>(n=55)</b> | <b>p-value for<br/>difference</b> |
|------------------------------------|-------------------------------|---------------------------------------|-----------------------------------|
| Age, yrs ( $\pm$ SD)               | 44.7 $\pm$ 15.2               | 57.5 $\pm$ 21.1                       | <0.001                            |
| Gender (M/F)                       | 234/324                       | 31/23                                 | 0.03                              |
| (%)                                | (42/58)                       | (57/43)                               |                                   |
| <b>Residence</b>                   |                               |                                       |                                   |
| Urban                              | 89 (16.0)                     | 55 (100.0)                            |                                   |
| Town Camp                          | 136 (24.4)                    | 0 (0.0)                               |                                   |
| Remote Community                   | 333 (59.7)                    | 0 (0.0)                               | <0.001                            |
| <b>Co-morbidities<sup>a</sup></b>  |                               |                                       |                                   |
| Diabetes                           | 247 (44.3)                    | 11 (20.0)                             | <0.001                            |
| Harmful Alcohol Consumption        | 205 (37.0)                    | 7 (12.7)                              | <0.001                            |
| Chronic Kidney Disease             |                               |                                       |                                   |
| Stage 3-4                          | 34 (6.1)                      | 5 (9.1)                               | 0.39                              |
| Stage 5                            | 83 (14.9)                     | 3 (5.5)                               | 0.06                              |
| Chronic liver disease <sup>b</sup> | 53 (9.6)                      | 6 (10.9)                              | 0.74                              |
| Bronchiectasis                     | 27 (4.8)                      | 0                                     | 0.10                              |
| Congestive Cardiac failure         | 15 (2.7)                      | 3 (5.5)                               | 0.25                              |
| Ischaemic heart disease            | 9 (1.6)                       | 7 (15.2)                              | <0.001                            |
| Valvular Heart Disease             | 27 (4.8)                      | 3 (5.5)                               | 0.84                              |

|    |                                          |            |           |        |
|----|------------------------------------------|------------|-----------|--------|
| 1  |                                          |            |           |        |
| 2  |                                          |            |           |        |
| 3  | Rheumatic heart disease                  | 12 (2.0)   | 0 (0.0)   | 0.27   |
| 4  |                                          |            |           |        |
| 5  | Palliative care                          | 10 (1.8)   | 5 (9.1)   | 0.001  |
| 6  |                                          |            |           |        |
| 7  |                                          |            |           |        |
| 8  | Malignancy                               | 13 (2.3)   | 11 (20.0) | <0.001 |
| 9  |                                          |            |           |        |
| 10 | IVDU                                     | 0 (0.0)    | 3 (5.5)   | 0.001  |
| 11 |                                          |            |           |        |
| 12 |                                          |            |           |        |
| 13 | <b>Community Acquired</b>                | 510 (91.6) | 49 (90.7) | 0.84   |
| 14 |                                          |            |           |        |
| 15 | <b>Primary focus of infection</b>        |            |           |        |
| 16 |                                          |            |           |        |
| 17 | No focus                                 | 250 (44.8) | 20 (36.4) | 0.37   |
| 18 |                                          |            |           |        |
| 19 | Pneumonia <sup>c</sup>                   | 110 (19.7) | 6 (10.9)  | 0.08   |
| 20 |                                          |            |           |        |
| 21 | Skin abscess                             | 66 (11.8)  | 5 (9.1)   | 0.65   |
| 22 |                                          |            |           |        |
| 23 | Pyelonephritis <sup>d</sup>              | 63 (11.3)  | 5 (9.1)   | 0.56   |
| 24 |                                          |            |           |        |
| 25 | Other                                    | 53 (9.5)   | 18 (32.7) | <0.001 |
| 26 |                                          |            |           |        |
| 27 | Enteritis                                | 15 (2.7)   | 1 (1.8)   | 0.71   |
| 28 |                                          |            |           |        |
| 29 | Bone/joint                               | 1 (0.2)    | 0.0 (0.0) | 0.61   |
| 30 |                                          |            |           |        |
| 31 |                                          |            |           |        |
| 32 |                                          |            |           |        |
| 33 |                                          |            |           |        |
| 34 | <b>Additional Infections<sup>e</sup></b> |            |           |        |
| 35 |                                          |            |           |        |
| 36 | Acute bacterial infections               | 69 (12.4)  | 2 (3.6)   | 0.05   |
| 37 |                                          |            |           |        |
| 38 | Pneumonia                                | 18 (3.2)   | 0 (0.0)   | 0.39   |
| 39 |                                          |            |           |        |
| 40 | Urinary tract                            | 20 (3.6)   | 1 (1.8)   | 0.49   |
| 41 |                                          |            |           |        |
| 42 | Skin                                     | 27 (4.8)   | 1 (1.8)   | 0.31   |
| 43 |                                          |            |           |        |
| 44 | Enteritis                                | 4 (0.7)    | 0         | 0.53   |
| 45 |                                          |            |           |        |
| 46 |                                          |            |           |        |
| 47 |                                          |            |           |        |
| 48 | Chronic Viral infections                 |            |           |        |
| 49 |                                          |            |           |        |
| 50 | HTLV-1 <sup>f</sup>                      | 137 (45.2) | 0 (0.0)   | <0.001 |
| 51 |                                          |            |           |        |
| 52 | Hepatitis B virus <sup>f</sup>           |            |           |        |
| 53 |                                          |            |           |        |
| 54 | HBsAg                                    | 49 (12.9)  | 1 (6.7)   | 0.70   |
| 55 |                                          |            |           |        |
| 56 |                                          |            |           |        |
| 57 |                                          |            |           |        |
| 58 |                                          |            |           |        |
| 59 |                                          |            |           |        |
| 60 |                                          |            |           |        |

|                                        |            |           |        |
|----------------------------------------|------------|-----------|--------|
| Anti-HBc                               | 193 (62.5) | 3 (27.3)  | <0.001 |
| <b>Parasites</b>                       |            |           |        |
| Strongyloidiasis <sup>f</sup>          | 78 (36.1)  | 0 (0.0)   | 0.001  |
| Scabies                                | 20 (4.0)   | 0 (0.0)   | 0.24   |
| <b>Mortality</b>                       |            |           |        |
| 28 days                                | 62 (11.1)  | 7 (12.7)  | 0.72   |
| All deaths                             | 145 (26.0) | 15 (27.3) | 0.84   |
| Age of death (years)                   | 47±15      | 68±21     | <0.001 |
| <b>Major BSI Pathogens<sup>g</sup></b> |            |           |        |
| Enterobacteriaceae                     | 370 (36.0) | 38 (34.5) | 0.56   |
| <i>Escherichia coli</i>                | 246 (23.9) | 28 (25.5) | 0.37   |
| <i>Klebsiella pneumoniae</i>           | 57 (5.54)  | 2 (1.82)  | 0.09   |
| <i>Staphylococcus aureus</i>           | 191 (18.6) | 20 (18.2) | 0.83   |
| MRSA                                   | 53 (5.15)  | 1 (0.91)  | <0.001 |
| <i>Streptococcus pneumoniae</i>        | 136 (13.2) | 8 (5.88)  | <0.001 |
| <i>Streptococcus pyogenes</i>          | 68 (6.61)  | 8 (7.27)  | 0.42   |
| <i>Haemophilus influenzae</i>          | 22 (2.14)  | 0         | 0.14   |
| Enteric pathogens <sup>h</sup>         | 29 (2.81)  | 1 (0.91)  | 0.27   |

2 a. comorbidities determined from IC-10 discharge morbidity codes

3 b. Chronic liver disease attributed to alcohol (Indigenous, 43; non-Indigenous, 5), chronic  
 4 hepatitis B (Indigenous, 10; non-Indigenous, 0) and chronic hepatitis C (Indigenous, 0;  
 5 non-Indigenous, 3).

6 c. Chest X-rays performed for 457 Indigenous patients.

- 1  
2  
3  
4 2 d. Respiratory cultures performed for 150 Indigenous patients.  
5  
6 3 e. Urine cultures performed for 310 Indigenous patients.  
7  
8 4 e. Alternative bacterial pathogen isolated.  
9  
10 5 f. Indigenous patients tested: HTLV-1, 309; HBsAg, 388; HBcAb, 309; Strongyloides  
11  
12 6 stercoralis serology, 235. Denominators exclude 6 Indigenous patients with indeterminate  
13  
14 7 HTLV-1 Western blot results and 19 Indigenous patients with borderline Strongyloides  
15  
16 8 serology whose infective status could not be determined.  
17  
18 9 f. Major BSI pathogens responsible for all recorded episodes 2001-2007.  
19  
20 10 g. Includes Salmonella spp., Shigella spp., Campylobacter spp.  
21  
22 11 Abbreviations: CHB, chronic hepatitis B virus; HCV, hepatitis C virus; IVDU,  
23  
24 12 intravenous drug use.  
25  
26  
27  
28  
29  
30  
31  
32  
33  
34  
35  
36  
37  
38  
39  
40  
41  
42  
43  
44  
45  
46  
47  
48  
49  
50  
51  
52  
53  
54  
55  
56  
57  
58  
59  
60

Table 2. Demographic and non-communicable disease associations for the major BSI pathogens among Indigenous adults.

|                  | n   | <i>S.aureus</i> |         |                      | <i>S.pneumonia</i> |         |                      | <i>K.Pneumonia</i> |         |                      | <i>E.Coli</i> |         |                      |
|------------------|-----|-----------------|---------|----------------------|--------------------|---------|----------------------|--------------------|---------|----------------------|---------------|---------|----------------------|
|                  |     | No (%)          | Yes (%) | p-value <sup>1</sup> | No (%)             | Yes (%) | p-value <sup>1</sup> | No (%)             | Yes (%) | p-value <sup>1</sup> | No (%)        | Yes (%) | p-value <sup>1</sup> |
| <b>Residence</b> |     |                 |         |                      |                    |         |                      |                    |         |                      |               |         |                      |
| Urban            | 89  | 86.5            | 13.5    |                      | 89.9               | 10.1    |                      | 96.6               | 3.4     |                      | 76.4          | 23.6    |                      |
| Town Camp        | 136 | 88.2            | 11.8    |                      | 83.1               | 16.9    |                      | 91.9               | 8.1     |                      | 73.5          | 26.5    |                      |
| Remote           | 333 | 80.5            | 19.5    | 0.08                 | 89.2               | 10.8    | 0.15                 | 94.6               | 5.4     | 0.30                 | 73.0          | 27.0    | 0.81                 |
| <b>Diabetes</b>  |     |                 |         |                      |                    |         |                      |                    |         |                      |               |         |                      |
| No               | 310 | 86.5            | 13.6    |                      | 83.9               | 16.1    |                      | 93.9               | 6.1     |                      | 74.1          | 25.8    |                      |
| Yes              | 247 | 79.8            | 20.2    | <b>0.035</b>         | 92.7               | 7.3     | <b>0.002</b>         | 94.7               | 5.3     | 0.66                 | 72.9          | 27.1    | 0.73                 |
| <b>CRF</b>       |     |                 |         |                      |                    |         |                      |                    |         |                      |               |         |                      |
| No               | 524 | 83.4            | 16.6    |                      | 87.6               | 12.4    |                      | 94.3               | 5.7     |                      | 73.7          | 26.3    |                      |
| Yes              | 34  | 82.4            | 17.7    | 0.87                 | 91.2               | 8.8     | 0.54                 | 94.1               | 5.9     | 0.97                 | 73.5          | 26.5    | 0.99                 |

|    |                |     |      |      |      |      |      |                  |      |     |      |      |      |                  |
|----|----------------|-----|------|------|------|------|------|------------------|------|-----|------|------|------|------------------|
| 1  |                |     |      |      |      |      |      |                  |      |     |      |      |      |                  |
| 2  |                |     |      |      |      |      |      |                  |      |     |      |      |      |                  |
| 3  |                |     |      |      |      |      |      |                  |      |     |      |      |      |                  |
| 4  |                |     |      |      |      |      |      |                  |      |     |      |      |      |                  |
| 5  | <b>HD</b>      |     |      |      |      |      |      |                  |      |     |      |      |      |                  |
| 6  |                |     |      |      |      |      |      |                  |      |     |      |      |      |                  |
| 7  | No             | 475 | 84.2 | 15.8 |      | 86.3 | 13.7 |                  | 94.1 | 5.9 |      | 70.5 | 29.5 |                  |
| 8  |                |     |      |      |      |      |      |                  |      |     |      |      |      |                  |
| 9  | Yes            | 83  | 78.3 | 21.7 | 0.18 | 96.4 | 3.6  | <b>0.01</b>      | 95.2 | 4.8 | 0.70 | 92.6 | 8.4  | <b>&lt;0.001</b> |
| 10 |                |     |      |      |      |      |      |                  |      |     |      |      |      |                  |
| 11 | <b>CLD</b>     |     |      |      |      |      |      |                  |      |     |      |      |      |                  |
| 12 |                |     |      |      |      |      |      |                  |      |     |      |      |      |                  |
| 13 |                |     |      |      |      |      |      |                  |      |     |      |      |      |                  |
| 14 | No             | 505 | 82.4 | 17.6 |      | 87.7 | 12.3 |                  | 93.9 | 6.1 |      | 73.5 | 26.5 |                  |
| 15 |                |     |      |      |      |      |      |                  |      |     |      |      |      |                  |
| 16 | Yes            | 53  | 92.5 | 7.6  | 0.06 | 88.7 | 11.3 | 0.84             | 98.1 | 1.9 | 0.20 | 75.6 | 24.5 | 0.75             |
| 17 |                |     |      |      |      |      |      |                  |      |     |      |      |      |                  |
| 18 | <b>Alcohol</b> |     |      |      |      |      |      |                  |      |     |      |      |      |                  |
| 19 |                |     |      |      |      |      |      |                  |      |     |      |      |      |                  |
| 20 |                |     |      |      |      |      |      |                  |      |     |      |      |      |                  |
| 21 | No             | 349 | 82.2 | 17.8 |      | 92.0 | 8.0  |                  | 95.1 | 4.9 |      | 75.1 | 24.9 |                  |
| 22 |                |     |      |      |      |      |      |                  |      |     |      |      |      |                  |
| 23 | Yes            | 205 | 84.9 | 15.1 | 0.42 | 80.5 | 19.5 | <b>&lt;0.001</b> | 93.1 | 6.8 | 0.33 | 71.7 | 28.3 | 0.38             |
| 24 |                |     |      |      |      |      |      |                  |      |     |      |      |      |                  |
| 25 |                |     |      |      |      |      |      |                  |      |     |      |      |      |                  |
| 26 |                |     |      |      |      |      |      |                  |      |     |      |      |      |                  |
| 27 |                |     |      |      |      |      |      |                  |      |     |      |      |      |                  |
| 28 |                |     |      |      |      |      |      |                  |      |     |      |      |      |                  |
| 29 |                |     |      |      |      |      |      |                  |      |     |      |      |      |                  |
| 30 |                |     |      |      |      |      |      |                  |      |     |      |      |      |                  |
| 31 |                |     |      |      |      |      |      |                  |      |     |      |      |      |                  |
| 32 |                |     |      |      |      |      |      |                  |      |     |      |      |      |                  |
| 33 |                |     |      |      |      |      |      |                  |      |     |      |      |      |                  |
| 34 |                |     |      |      |      |      |      |                  |      |     |      |      |      |                  |
| 35 |                |     |      |      |      |      |      |                  |      |     |      |      |      |                  |
| 36 |                |     |      |      |      |      |      |                  |      |     |      |      |      |                  |
| 37 |                |     |      |      |      |      |      |                  |      |     |      |      |      |                  |
| 38 |                |     |      |      |      |      |      |                  |      |     |      |      |      |                  |
| 39 |                |     |      |      |      |      |      |                  |      |     |      |      |      |                  |
| 40 |                |     |      |      |      |      |      |                  |      |     |      |      |      |                  |
| 41 |                |     |      |      |      |      |      |                  |      |     |      |      |      |                  |
| 42 |                |     |      |      |      |      |      |                  |      |     |      |      |      |                  |
| 43 |                |     |      |      |      |      |      |                  |      |     |      |      |      |                  |
| 44 |                |     |      |      |      |      |      |                  |      |     |      |      |      |                  |
| 45 |                |     |      |      |      |      |      |                  |      |     |      |      |      |                  |
| 46 |                |     |      |      |      |      |      |                  |      |     |      |      |      |                  |
| 47 |                |     |      |      |      |      |      |                  |      |     |      |      |      |                  |
| 48 |                |     |      |      |      |      |      |                  |      |     |      |      |      |                  |
| 49 |                |     |      |      |      |      |      |                  |      |     |      |      |      |                  |

Major BSI pathogens recorded during the 5 years period prior to the final BSI admission. Abbreviations: Alcohol, harmful alcohol consumption; CRF, stage 3 or 4 chronic renal disease; HD, stage 5 renal disease; CLD, chronic liver disease.

Table 3. Infections recorded for Indigenous and non-Indigenous adults during the 5 years prior to the final BSI presentation<sup>a</sup>

|                          | Indigenous | Non-Indigenous | p-value |
|--------------------------|------------|----------------|---------|
|                          | n=431 (%)  | (n=52)         |         |
| Any                      | 296 (68.7) | 18 (34.6)      | <0.001  |
| BSI                      | 105 (24.4) | 4 (7.7)        | 0.007   |
| <i>Respiratory Tract</i> | 179 (41.5) | 3 (5.8)        | <0.001  |
| Pneumonia                | 164 (38.1) | 4 (7.7)        | <0.001  |
| >3 episodes              | 32 (7.4)   | 0 (0.0)        | 0.04    |
| Exacerbation BE          | 13 (6.0)   | 0 (0.0)        | 0.20    |
| <i>Skin/Soft Tissue</i>  | 154 (35.7) | 7 (13.5)       | 0.001   |
| <i>Infections</i>        |            |                |         |
| Abscess                  | 88 (20.5)  | 0 (0.0)        | <0.001  |
| Cellulitis               | 47 (10.9)  | 7 (13.7)       | 0.55    |
| Wound infection          | 42 (9.7)   | 0 (0.0)        | 0.02    |
| <i>Pyelonephritis</i>    | 77 (17.9)  | 4 (7.7)        | 0.06    |
| <i>Bone/joint</i>        | 11 (2.6)   | 0 (0.0)        | 0.24    |
| <i>Enteritis</i>         | 21 (4.9)   | 1 (1.9)        | 0.33    |
| <i>Scabies</i>           | 14 (3.3)   | 0 (0.0)        | 0.19    |
| <i>Other</i>             | 6 (1.4)    | 0 (0.0)        | 0.39    |

a. Excluding haemodialysis patients (n=83 indigenous, 3 non-indigenous), patients with bronchiectasis (n=27) and those residing outside the Alice Springs urban and rural districts for whom data were not available (Indigenous, 18; non-Indigenous, 0).

Abbreviations: BSI, blood stream infections; BE, bronchiectasis.



Table 4: Multivariate adjusted odds ratios for previous infections among Indigenous patients<sup>a</sup>

|                      | <b>Any infection<br/>(n=470)<sup>b</sup></b> | <b>BSI<br/>(n=553)</b> | <b>Skin<sup>b</sup><br/>(n=470)</b> | <b>Pneumonia<sup>c</sup><br/>(n=443)</b> |
|----------------------|----------------------------------------------|------------------------|-------------------------------------|------------------------------------------|
|                      | <b>Odds ratio</b>                            | <b>Odds ratio</b>      | <b>Odds ratio</b>                   | <b>Odds ratio</b>                        |
|                      | <b>(95% CI)</b>                              | <b>(95% CI)</b>        | <b>(95% CI)</b>                     | <b>(95% CI)</b>                          |
| <b>Residence</b>     |                                              |                        |                                     |                                          |
| Urban                | 1.00                                         | 1.00                   | 1.00                                | 1.00                                     |
| Town camp            | 1.2 (0.6-2.4)                                | 1.8 (0.9-3.4)          | 1.3 (0.7-2.5)                       | 1.3 (0.7-2.6)                            |
| Remote               | 0.8 (0.5-1.4)                                | 1.3 (0.7-2.3)          | 1.2 (0.7-2.2)                       | 0.8 (0.4-1.4)                            |
| Age (10 yrs)         | 0.9 (0.8-1.0)                                | 1.1 (0.9-1.2)          | 0.9 (0.8-1.0)                       | 1.0 (0.9-1.2)                            |
| Gender (0=F,<br>1=M) | 1.0 (0.7-1.5)                                | 1.3 (0.9-1.9)          | 1.0 (0.7-1.6)                       | 1.0 (0.7-1.6)                            |
| Diabetes             | 1.4 (0.9-2.2)                                | 1.1 (0.7-1.7)          | <b>2.1 (1.4-3.3)</b>                | 1.1 (0.7-1.7)                            |
| CRF                  | <b>3.0 (1.1-8.2)</b>                         | 1.7 (0.8-3.8)          | 1.5 (0.7-3.2)                       | 1.6 (0.7-3.7)                            |
| Alcohol              | <b>2.8 (1.8-4.4)</b>                         | <b>1.7 (1.1-2.5)</b>   | <b>1.7 (1.1-2.6)</b>                | <b>4.3 (2.8-6.7)</b>                     |

1  
2  
3 a. Previous infections during 5 years prior to the final BSI in the study period. Adjusted  
4  
5 for other risk factors in table.  
6

7  
8 b. Excluding patients receiving haemodialysis.  
9

10 c. Excluding patients receiving haemodialysis and those with bronchiectasis  
11

12 Abbreviations: BSI, blood stream infections; CRF, chronic renal failure excluding  
13 patients receiving haemodialysis.  
14  
15  
16  
17  
18  
19  
20  
21  
22  
23  
24  
25  
26  
27  
28  
29  
30  
31  
32  
33  
34  
35  
36  
37  
38  
39  
40  
41  
42  
43  
44  
45  
46  
47  
48  
49  
50  
51  
52  
53  
54  
55  
56  
57  
58  
59  
60

Table 5: Multivariate analysis of factors associated with 28 day and long-term survival for 510 Indigenous patients following a Community-acquired Blood Stream Infection<sup>a</sup>.

|                   | n         | Deaths    |       | 28 day survival      |              | Long-term survival   |                  |
|-------------------|-----------|-----------|-------|----------------------|--------------|----------------------|------------------|
|                   |           | (28 days) | (all) | HR (95% CI)          | p-value      | HR (95% CI)          | p-value          |
| Residence         |           |           |       |                      |              |                      |                  |
| Urban             | 63        | 7         | 20    | 1.00                 |              | 1.0                  |                  |
| Town Camp         | 125       | 20        | 37    | 1.7 (0.7-4.1)        |              | 1.2 (0.7-2.2)        |                  |
| Remote            | 302       | 22        | 67    | 0.9 (0.4-2.0)        | 0.12         | 0.9 (0.5-1.5)        | 0.28             |
| Age (10yrs)       |           |           |       | 1.04 (0.8-1.3)       | 0.70         | 1.0 (0.9-1.1)        | 0.99             |
| Gender (0=F,1=M)  | 298F/212M | 23/26     | 65/59 | 1.5 (0.8-2.7)        | 0.17         | 1.3 (0.9-2.0)        | 0.13             |
| CLD (0=No, 1=Yes) | 41        | 11        | 20    | <b>3.3 (1.6-6.7)</b> | <b>0.001</b> | <b>2.5 (1.5-4.2)</b> | <b>&lt;0.001</b> |
| Non-RHD           | 37        | 9         | 16    | <b>2.9 (1.4-6.2)</b> | <b>0.005</b> | <b>2.1 (1.2-3.6)</b> | <b>0.01</b>      |
| CRF               | 28        | 6         | 11    | <b>2.6 (1.0-6.5)</b> | <b>0.04</b>  | <b>2.3 (1.2-4.3)</b> | <b>0.01</b>      |

|                       |     |    |    |                        |                  |                       |                  |
|-----------------------|-----|----|----|------------------------|------------------|-----------------------|------------------|
| Malignancy            | 11  | 3  | 10 | 2.9 (0.9-9.9)          | 0.09             | <b>6.0 (3.0-12.4)</b> | <b>&lt;0.001</b> |
| Organism <sup>b</sup> |     |    |    |                        |                  |                       |                  |
| <i>E.coli</i>         | 143 | 5  | 22 | 1.0                    |                  | 1.0                   |                  |
| <i>S.aureus</i>       | 83  | 7  | 18 | <b>2.7 (1.0-7.3)</b>   | <b>0.05</b>      | <b>1.8 (1.1-3.0)</b>  | <b>0.03</b>      |
| <i>K.pneumoniae</i>   | 29  | 12 | 15 | 2.3 (0.7-7.5)          | 0.17             | 1.4 (0.7-2.7)         | 0.17             |
| <i>S.pneumoniae</i>   | 67  | 5  | 17 | <b>13.4 (4.6-39.2)</b> | <b>&lt;0.001</b> | <b>4.8 (2.5-9.5)</b>  | <b>&lt;0.001</b> |
| <i>Other</i>          | 188 | 20 | 52 | 1.8 (0.5-6.3)          | 0.37             | 1.5 (0.8-3.0)         | 0.22             |

a. Excluded from analysis: 48 Nosocomial infections.

b. Pathogens isolated from blood cultures

Abbreviations: BSI, blood stream infection; CCF; CLD, chronic liver disease; CRF, chronic renal failure; Non-RHD, ischaemic heart disease and cardiac failure.

## 1 References

- 2 1. Maher D, Smeeth, L., Sekajugo, J. Health transition in Africa: practical policy  
3 proposals for primary care. *Bull WHO*. 2010;88:943-948.
- 4 2. Gracey M, King, M. Indigenous Health part 1: determinants and disease patterns.  
5 *Lancet*. 2009;374:65-75.
- 6 3. Australian Bureau of Statistics. *The health and welfare of Australia's Aboriginal  
7 and Torres Strait Islander peoples*. Canberra. 2005.
- 8 4. Zhao Y, Dempsey, K. Causes of inequality in life expectancy between indigenous  
9 and non-indigenous people in the Northern Territory, 1981-2000: a decomposition  
10 study. *Med J Aust*. 2006;184:490-494.
- 11 5. Davis J, Cheng, AC., McMillan, M., Humphrey, AB., Stephens, DP., Anstey,  
12 NM. Sepsis in the tropical Top End of Australia's Northern Territory: disease  
13 burden and impact on Indigenous Australians. *Med J Aust*. 2011;194:519-524.
- 14 6. Einsiedel L, Woodman, RJ. Two Nations: racial disparities in bloodstream  
15 infections recorded at Alice Springs Hospital, central Australia, 2001-2005. *Med J  
16 Aust*. 2010;192:567-571.
- 17 7. Einsiedel L, Fernandes, L., Spelman, T., Steinfors, D., Gotuzzo, E. Bronchiectasis  
18 is associated with Human T Lymphotropic Virus 1 infection in an Indigenous  
19 Australian population. *Clin Infect Dis*. 2012;54(1):43-50.
- 20 8. Einsiedel L, Fernandes, L., Woodman, R. Racial disparities in infection-related  
21 mortality at Alice Springs Hospital, central Australia, 2000-2005. *Med J Aust*.  
22 2008;188:568-571.

- 1  
2  
3  
4 1 9. Kway M, Rose, CE., Fry, AM., Singleton, JA., Moore, Z., Zell, ER., Whitney,  
5  
6 2 CG. The influence of chronic illness on the incidence of invasive pneumococcal  
7  
8 3 disease in adults. *Clin Infect Dis.* 2005;192:377-386.  
9  
10 4 10. Joshi N, Caputo, GM., Weitekamp, MR., Karchmer, AW. Infections in diabetic  
11  
12 5 patients. *N. Engl. J. Med.* 1999;341(25):1906-1912.  
13  
14 6 11. Baker M, Barnard, LT., Kvalsvig, A., Verrall, A., Zhang, J., Keall, M., Wilson,  
15  
16 7 N., Wall, T., Howden-Chapman, P. Increasing incidence of serious infectious  
17  
18 8 diseases and inequalities in New Zealand: a national epidemiological study.  
19  
20 9 *Lancet.* 2012;379:1112-1119.  
21  
22 10 12. Anaya J. *Report of the Special Rapporteur on the situation of human rights and*  
23  
24 11 *fundamental freedoms of indigenous peoples, James Anaya, on the situation of*  
25  
26 12 *indigenous people in Australia:* United Nations;2010.  
27  
28 13 13. d'Espaignet E, Kennedy, K., Paterson, B., Measey, M. *Health Status in the*  
29  
30 14 *Northern Territory 1998.* Darwin: Epidemiology, Primary Care and Coordinated  
31  
32 15 Care Branch;1998.  
33  
34 16 14. McDonald E, Bailie, R., Grace, J., Brewster, D. An ecological approach to health  
35  
36 17 promotion in remote Australian Aboriginal communities. *Health Promotion*  
37  
38 18 *International.* 2010;25(1):42-53.  
39  
40 19 15. O'Brien J, Lu, B., Ali, NA., Martin, GS., Aberegg, SK., Marsh, CB., Lemeshow,  
41  
42 20 S., Douglas, IS. Alcohol dependence is independently associated with sepsis,  
43  
44 21 septic shock and hospital mortality among adult intensive care unit patients. *Crit.*  
45  
46 22 *Care Med.* 2007;35(2):345-350.  
47  
48  
49  
50  
51  
52  
53  
54  
55  
56  
57  
58  
59  
60

- 1  
2  
3  
4  
5  
6  
7  
8  
9  
10  
11  
12  
13  
14  
15  
16  
17  
18  
19  
20  
21  
22  
23  
24  
25  
26  
27  
28  
29  
30  
31  
32  
33  
34  
35  
36  
37  
38  
39  
40  
41  
42  
43  
44  
45  
46  
47  
48  
49  
50  
51  
52  
53  
54  
55  
56  
57  
58  
59  
60
- 1 **16.** Laupland K, Gregson, DB., Zygun, DA., Doig, CJ., Mortis, G., Church, DL.  
2 Severe blood stream infections: a population-based assessment. *Crit Care Med.*  
3 2004;32:992-997.
- 4 **17.** Nuori J, Butler, JC., Farley, MM., Harrison, LH., McGeer, A., Kolczak, MS.,  
5 Breiman, RF. Cigarette smoking and invasive pneumococcal disease. *N Engl J*  
6 *Med.* 2000;342:681-689.
- 7 **18.** Dopirak M, Hill, C., Oleksiw, M., Dumigan, D., Arvai, J., English, E., Carusillo,  
8 E., Malo-Schlegel, S., Richo, J., Traficanti, K., Welch, B., Cooper, B.  
9 Surveillance of hemodialysis-associated primary bloodstream infections: the  
10 experience of ten hospital-based centers. *Infect Control Hosp Epidemiol.*  
11 2002;23:721-724.
- 12 **19.** Zhao Y, Connors, C., Wright, J., Guthridge, S. Estimating chronic disease  
13 prevalence among the remote Aboriginal population of the Northern Territory  
14 using multiple data sources. *Aust NZ J Public Health.* 2008;32:307-313.
- 15 **20.** Hoy W, Davey, RL., Sharma, S., Hoy, PW., Smith, JM., Kondalsamy-  
16 Chennakesavan, S. Chronic disease profiles in remote Aboriginal settings and  
17 implications for health services planning. *Aust NZ J Public Health.* 2010;34:11-  
18 18.
- 19 **21.** Moberley S, Krause, V., Cook, H., Mulholland, K., Carapetis, J., Torzillo, P.,  
20 Andrews, R. Failure to vaccinate or failure of vaccine? Effectiveness of the 23-  
21 valent pneumococcal polysaccharide vaccine program in Indigenous adults in the  
22 Northern Territory of Australia. *Vaccine.* 2010;28:2296-2301.

- 1  
2  
3 1 22. Flory J, Joffe, M., Fishman, NO., Edelstein, PH., Metlay, JP. Socioeconomic risk  
4  
5 factors for bacteraemic pneumococcal pneumonia in adults. *Epidemiol Infect.*  
6  
7 2009;137:717-726.  
8  
9  
10 4 23. Tong S, Bishop, E., Lilliebridge, R., Cheng, A., Spasova-Penkova, Z., Holt, D.,  
11  
12 Giffard, P., McDonald, M., Currie, B., Boutlis, C. Community Associated strains  
13  
14 of Methicillin-Resistant *Staphylococcus aureus* and Methicillin-Susceptible  
15  
16 *S.aureus* in Indigenous Northern Australia: Epidemiology and Outcomes. *J Infect*  
17  
18 *Dis.* 2009;199:1461-1470.  
19  
20  
21 9 24. Huggan P, Wells, JE., Browne, M., Richardson, A., Murdoch, DR., Chambers,  
22  
23 ST. Population-based epidemiology of *Staphylococcus aureus* bloodstream  
24  
25 infection in Canterbury, New Zealand. *Int Med J.* 2010;40:117-125.  
26  
27  
28 12 25. Bagger J, Zindrou, D., Taylor, KM. Post-operative infection with Methicillin-  
29  
30 resistant *Staphylococcus aureus* and socioeconomic background. *Lancet.*  
31  
32 2004;363:706-708.  
33  
34  
35 15 26. Marmot M, Friel, S., Bell, R., Houweling, T., Taylor, S. Closing the gap in a  
36  
37 generation: health equity through action on the social determinants of health.  
38  
39 *Lancet.* 2008;372(November 8):1661-1669.  
40  
41  
42 18 27. Beaglehole R, Bonita, R., Horton, R., Adams, C., Alleyne, G., Asaria, P. et al for  
43  
44 the Lancet NCD action group and the NCD alliance. Priority actions for the non-  
45  
46 communicable disease crisis. *Lancet.* 2011;377:1438-1447.  
47  
48  
49 21 28. Bailie R, Stevens, MR., McDonald, E., Halpin, S., Brewster, D., Robinson, G.,  
50  
51 Guthridge, S. Skin infection, housing and social circumstances in children living  
52  
53  
54  
55  
56  
57  
58  
59  
60



- 1  
2  
3 1 in remote Indigenous communities: testing conceptual and methodological  
4  
5 2 approaches. *BMC public health*. 2005;5.  
6  
7  
8 3 **29.** McDonald M, Towers, RJ., Andrews, RM., Bengler, N., Currie, BJ., Carapetis, JR.  
9  
10 4 Low rates of streptococcal pharyngitis and high rates of pyoderma in Australian  
11  
12 5 Aboriginal communities where acute rheumatic fever is hyperendemic. *Clin Infect*  
13  
14 6 *Dis*. 2006;43:683-689.  
15  
16  
17 7 **30.** Bailie R, Runcie, MJ. Household infrastructure in Aboriginal communities and  
18  
19 8 the implications for health improvement. *Med J Aust*. 2001;175:363-366.  
20  
21  
22 9 **31.** Currie B, Carapetis, JR. Skin infections and infestations in Aboriginal  
23  
24 10 communities in northern Australia. *Aust J Dermatol*. 2000;41:139-145.  
25  
26  
27 11 **32.** Hewagama S, Spelman, T., Einsiedel, L. Staphylococcus aureus bacteraemia at  
28  
29 12 Alice Springs Hospital, central Australia, 2003-2006. *Int Med J*. 2012;42:505-  
30  
31 13 512.  
32  
33  
34 14 **33.** Carapetis J, Wolff, DR., Currie, BJ. Acute rheumatic fever and rheumatic heart  
35  
36 15 disease in the Top End of Australia's Northern Territory. *Med J Aust*. 1996;164(5  
37  
38 16 February):146-149.  
39  
40  
41 17 **34.** Jacoby P, Carvillo, K., Hall, S., Riley, T., Bowman, J., Leach, A., Lehmann, D.,  
42  
43 18 Kalgoorlie Otitis Media Research Project Team. Crowding and other strong  
44  
45 19 predictors of upper respiratory carriage of otitis media related bacteria in  
46  
47 20 Australian Aboriginal and non-Aboriginal children. *Paed Inf Dis J*.  
48  
49 21 2011;30(6):480-485.  
50  
51  
52  
53  
54  
55  
56  
57  
58  
59  
60

- 1  
2  
3 1 35. Verdonck K, Gonzalez, E., Van Dooren, S., Vandamme, A., Vanham, G.,  
4  
5 2 Gotuzzo, E. Human T-lymphotropic virus 1: recent knowledge about an ancient  
6  
7 3 infection. *Lancet Infect Dis.* 2007;7:266-281.  
8  
9  
10 4 36. Einsiedel L, van Iersel, E., Macnamara, R., Spelman, T., Heffernan, M., Bray, L,  
11  
12 5 Morris, H., Porter, B., Davis, A. Self-Discharge by adult Aboriginal patients at  
13  
14 6 Alice Springs Hospital, central Australia: insights from a prospective cohort  
15  
16 7 study. *Aust Health Rev.* 2012.  
17  
18  
19 8 37. Priest N, Paradies, Y., Stevens, M., Bailie, R. Exploring relationships between  
20  
21 9 racism, housing and child illness in remote indigenous communities. *J Epidemiol*  
22  
23 10 *Community Health* 2012;66:440-447.  
24  
25  
26 11 38. Boutayeb A, Boutayeb, B. The burden of non-communicable diseases in  
27  
28 12 developing countries. *Int J Equity in Health.* 2005;4(1):2.  
29  
30  
31 13 39. Omran A. A theory of the epidemiology of population change. *Milbank Mem*  
32  
33 14 *Fund Q.* 1971;49:509-538.  
34  
35  
36 15 40. De Maeseneer J, Roberts RG, Demarzo M, et al. Tackling NCDs: a different  
37  
38 16 approach is needed. *The Lancet.* 2012;379(9829):1860-1861.  
39  
40  
41 17  
42  
43 18  
44  
45  
46  
47  
48  
49  
50  
51  
52  
53  
54  
55  
56  
57  
58  
59  
60

Figure 1. Blood stream infection incidence rates according to ethnicity and place of residence.

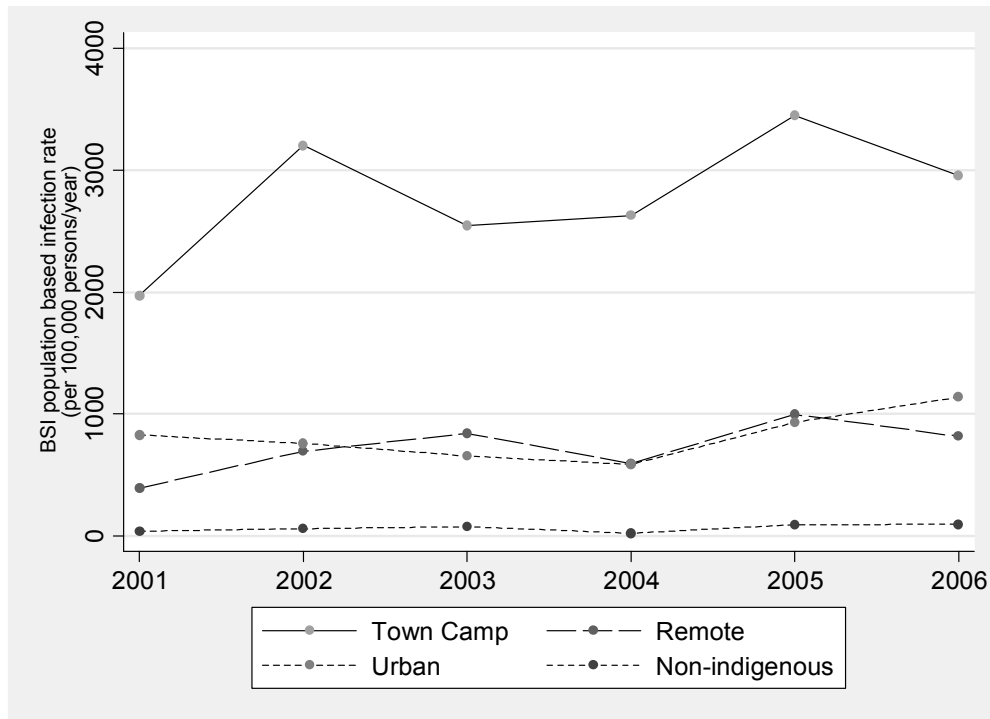

Blood Stream infection incidence rates according to ethnicity and place of residence. Town Camp, Indigenous residents of Town Camp; Urban, Indigenous residents of township who do not reside in a town camp; Remote, Indigenous residents of remote Indigenous communities. Non-Indigenous residents of Alice Springs region.

Fig 2 Survival of Indigenous adults according to place of residence

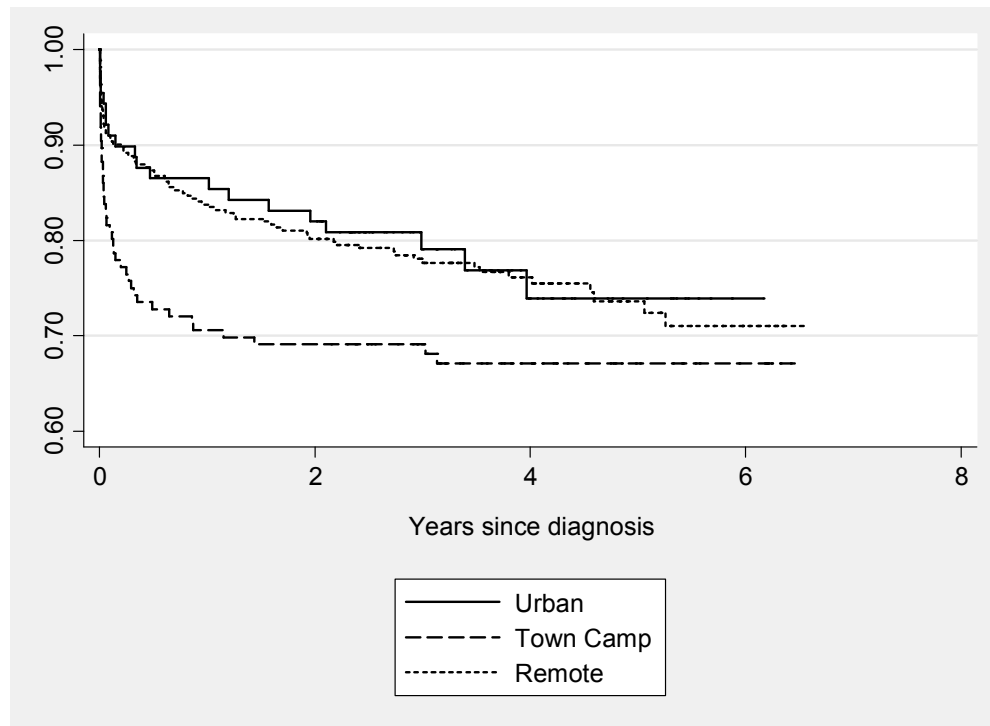

Survival following the final BSI recorded during the study period according to place of residence. Urban, residence within the township, but not in a town camp; Town Camp, residence in a town camp within the township; Remote, residence in a remote Indigenous community.

## STROBE Statement—checklist of items that should be included in reports of observational studies

|                              | Item No | Recommendation                                                                                                                                                                                                                                                                                                                                                                                                                                                                                                                                                                                                                                                                                   |
|------------------------------|---------|--------------------------------------------------------------------------------------------------------------------------------------------------------------------------------------------------------------------------------------------------------------------------------------------------------------------------------------------------------------------------------------------------------------------------------------------------------------------------------------------------------------------------------------------------------------------------------------------------------------------------------------------------------------------------------------------------|
| <b>Title and abstract</b>    | 1       | (a) Indicate the study's design with a commonly used term in the title or the abstract<br>(b) Provide in the abstract an informative and balanced summary of what was done and what was found                                                                                                                                                                                                                                                                                                                                                                                                                                                                                                    |
| <b>Introduction</b>          |         |                                                                                                                                                                                                                                                                                                                                                                                                                                                                                                                                                                                                                                                                                                  |
| Background/rationale         | 2       | Explain the scientific background and rationale for the investigation being reported                                                                                                                                                                                                                                                                                                                                                                                                                                                                                                                                                                                                             |
| Objectives                   | 3       | State specific objectives, including any prespecified hypotheses                                                                                                                                                                                                                                                                                                                                                                                                                                                                                                                                                                                                                                 |
| <b>Methods</b>               |         |                                                                                                                                                                                                                                                                                                                                                                                                                                                                                                                                                                                                                                                                                                  |
| Study design                 | 4       | Present key elements of study design early in the paper                                                                                                                                                                                                                                                                                                                                                                                                                                                                                                                                                                                                                                          |
| Setting                      | 5       | Describe the setting, locations, and relevant dates, including periods of recruitment, exposure, follow-up, and data collection                                                                                                                                                                                                                                                                                                                                                                                                                                                                                                                                                                  |
| Participants                 | 6       | (a) <i>Cohort study</i> —Give the eligibility criteria, and the sources and methods of selection of participants. Describe methods of follow-up<br><i>Case-control study</i> —Give the eligibility criteria, and the sources and methods of case ascertainment and control selection. Give the rationale for the choice of cases and controls<br><i>Cross-sectional study</i> —Give the eligibility criteria, and the sources and methods of selection of participants<br>(b) <i>Cohort study</i> —For matched studies, give matching criteria and number of exposed and unexposed<br><i>Case-control study</i> —For matched studies, give matching criteria and the number of controls per case |
| Variables                    | 7       | Clearly define all outcomes, exposures, predictors, potential confounders, and effect modifiers. Give diagnostic criteria, if applicable                                                                                                                                                                                                                                                                                                                                                                                                                                                                                                                                                         |
| Data sources/<br>measurement | 8*      | For each variable of interest, give sources of data and details of methods of assessment (measurement). Describe comparability of assessment methods if there is more than one group                                                                                                                                                                                                                                                                                                                                                                                                                                                                                                             |
| Bias                         | 9       | Describe any efforts to address potential sources of bias                                                                                                                                                                                                                                                                                                                                                                                                                                                                                                                                                                                                                                        |
| Study size                   | 10      | Explain how the study size was arrived at                                                                                                                                                                                                                                                                                                                                                                                                                                                                                                                                                                                                                                                        |
| Quantitative variables       | 11      | Explain how quantitative variables were handled in the analyses. If applicable, describe which groupings were chosen and why                                                                                                                                                                                                                                                                                                                                                                                                                                                                                                                                                                     |
| Statistical methods          | 12      | (a) Describe all statistical methods, including those used to control for confounding<br>(b) Describe any methods used to examine subgroups and interactions<br>(c) Explain how missing data were addressed<br>(d) <i>Cohort study</i> —If applicable, explain how loss to follow-up was addressed<br><i>Case-control study</i> —If applicable, explain how matching of cases and controls was addressed<br><i>Cross-sectional study</i> —If applicable, describe analytical methods taking account of sampling strategy<br>(e) Describe any sensitivity analyses                                                                                                                                |

Continued on next page

**Results**

|                  |     |                                                                                                                                                                                                                                                                                                                                                                                                               |
|------------------|-----|---------------------------------------------------------------------------------------------------------------------------------------------------------------------------------------------------------------------------------------------------------------------------------------------------------------------------------------------------------------------------------------------------------------|
| Participants     | 13* | (a) Report numbers of individuals at each stage of study—eg numbers potentially eligible, examined for eligibility, confirmed eligible, included in the study, completing follow-up, and analysed<br>(b) Give reasons for non-participation at each stage<br>(c) Consider use of a flow diagram                                                                                                               |
| Descriptive data | 14* | (a) Give characteristics of study participants (eg demographic, clinical, social) and information on exposures and potential confounders<br>(b) Indicate number of participants with missing data for each variable of interest<br>(c) <i>Cohort study</i> —Summarise follow-up time (eg, average and total amount)                                                                                           |
| Outcome data     | 15* | <i>Cohort study</i> —Report numbers of outcome events or summary measures over time<br><i>Case-control study</i> —Report numbers in each exposure category, or summary measures of exposure<br><i>Cross-sectional study</i> —Report numbers of outcome events or summary measures                                                                                                                             |
| Main results     | 16  | (a) Give unadjusted estimates and, if applicable, confounder-adjusted estimates and their precision (eg, 95% confidence interval). Make clear which confounders were adjusted for and why they were included<br>(b) Report category boundaries when continuous variables were categorized<br>(c) If relevant, consider translating estimates of relative risk into absolute risk for a meaningful time period |
| Other analyses   | 17  | Report other analyses done—eg analyses of subgroups and interactions, and sensitivity analyses                                                                                                                                                                                                                                                                                                                |

**Discussion**

|                  |    |                                                                                                                                                                            |
|------------------|----|----------------------------------------------------------------------------------------------------------------------------------------------------------------------------|
| Key results      | 18 | Summarise key results with reference to study objectives                                                                                                                   |
| Limitations      | 19 | Discuss limitations of the study, taking into account sources of potential bias or imprecision. Discuss both direction and magnitude of any potential bias                 |
| Interpretation   | 20 | Give a cautious overall interpretation of results considering objectives, limitations, multiplicity of analyses, results from similar studies, and other relevant evidence |
| Generalisability | 21 | Discuss the generalisability (external validity) of the study results                                                                                                      |

**Other information**

|         |    |                                                                                                                                                               |
|---------|----|---------------------------------------------------------------------------------------------------------------------------------------------------------------|
| Funding | 22 | Give the source of funding and the role of the funders for the present study and, if applicable, for the original study on which the present article is based |
|---------|----|---------------------------------------------------------------------------------------------------------------------------------------------------------------|

\*Give information separately for cases and controls in case-control studies and, if applicable, for exposed and unexposed groups in cohort and cross-sectional studies.

**Note:** An Explanation and Elaboration article discusses each checklist item and gives methodological background and published examples of transparent reporting. The STROBE checklist is best used in conjunction with this article (freely available on the Web sites of PLoS Medicine at <http://www.plosmedicine.org/>, Annals of Internal Medicine at <http://www.annals.org/>, and Epidemiology at <http://www.epidem.com/>). Information on the STROBE Initiative is available at [www.strobe-statement.org](http://www.strobe-statement.org).

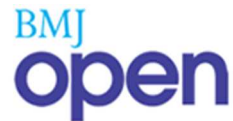

**Non-communicable diseases, infection and survival in a retrospective cohort of Indigenous and non-Indigenous adults in central Australia.**

|                                 |                                                                                                                                                                                                                                                                                                                                                         |
|---------------------------------|---------------------------------------------------------------------------------------------------------------------------------------------------------------------------------------------------------------------------------------------------------------------------------------------------------------------------------------------------------|
| Journal:                        | <i>BMJ Open</i>                                                                                                                                                                                                                                                                                                                                         |
| Manuscript ID:                  | bmjopen-2013-003070.R1                                                                                                                                                                                                                                                                                                                                  |
| Article Type:                   | Research                                                                                                                                                                                                                                                                                                                                                |
| Date Submitted by the Author:   | 02-Jun-2013                                                                                                                                                                                                                                                                                                                                             |
| Complete List of Authors:       | Einsiedel, Lloyd; Flinders University, Northern Territory Rural Clinical School<br>Fernandes, Liselle; Flinders University, NTRCS<br>Joseph, Sheela; Flinders University, NTRCS<br>Brown, Alex; Baker IDI Heart and Diabetes Institute, Centre for Indigenous Vascular and Diabetes Research<br>Woodman, Richard; Flinders University, General Practice |
| <b>Primary Subject Heading</b>: | Infectious diseases                                                                                                                                                                                                                                                                                                                                     |
| Secondary Subject Heading:      | Public health, Global health                                                                                                                                                                                                                                                                                                                            |
| Keywords:                       | INFECTIOUS DISEASES, Public health < INFECTIOUS DISEASES, Epidemiology < INFECTIOUS DISEASES, MICROBIOLOGY, Diabetes & endocrinology < INTERNAL MEDICINE, Nephrology < INTERNAL MEDICINE                                                                                                                                                                |
|                                 |                                                                                                                                                                                                                                                                                                                                                         |

SCHOLARONE™  
Manuscripts

only

1  
2  
3 2 Non-communicable diseases, infection and survival in a retrospective cohort  
4 of Indigenous and non-Indigenous adults in central Australia.  
5  
6  
7  
8

9 Lloyd Einsiedel<sup>1</sup>, Liselle Fernandes<sup>1</sup>, Sheela Joseph<sup>1</sup>, Alex Brown<sup>2</sup> and  
10  
11 Richard J Woodman<sup>1</sup>  
12  
13

14  
15  
16  
17  
18  
19  
20 9 (1) Flinders University/Northern Territory Rural Clinical School, Alice Springs Hospital, 0870,  
21 Northern Territory, Australia  
22  
23

24  
25  
26 11 (2) Head, Centre for Indigenous Vascular Research, Baker IDI Heart and Diabetes  
27 Institute, Alice Springs Hospital, 0870, Northern Territory, Australia.  
28  
29  
30

31  
32  
33  
34  
35 14 § Corresponding author:  
36

37  
38  
39 15 Lloyd Einsiedel. Alice Springs Hospital, Department of Medicine, Darwin, Northern  
40 Territory, Australia. Tel: + 61 08 89519607, Fax: + 61 08 89538385, E-mail:  
41  
42  
43 17 [lloyd.einsiedel@health.sa.gov.au](mailto:lloyd.einsiedel@health.sa.gov.au)  
44  
45

46  
47  
48  
49 19 Running title: Infection risk in Indigenous Australians  
50

51  
52  
53 20 Keywords: Non-communicable diseases, diabetes, alcohol, infection, Indigenous health,  
54  
55 21 Australia  
56  
57  
58  
59  
60



1  
2  
3 2 Word count:

4  
5 3 Abstract: 293

6  
7 4 Text: 3758

8  
9 5 References: 47

10  
11  
12  
13 6

14  
15  
16  
17  
18  
19  
20  
21  
22  
23  
24  
25  
26  
27  
28  
29  
30  
31  
32  
33  
34  
35  
36  
37  
38  
39  
40  
41  
42  
43  
44  
45  
46  
47  
48  
49  
50  
51  
52  
53  
54  
55  
56  
57  
58  
59  
60

For peer review only

1  
2  
3 **Abstract**  
4

5 Objectives: We hypothesize that rising prevalence rates of non-communicable diseases  
6 (NCDs) increases infection risk and worsens outcomes among socially disadvantaged  
7  
8 Indigenous Australians undergoing a rapid epidemiological transition.  
9

10 Design: Pathology, imaging and discharge morbidity codes were retrospectively reviewed  
11 for a period of 5 years prior to admission with a blood stream infection (BSI), 1st January  
12 2003 to 30th June 2007.  
13

14 Participants: 558 Indigenous and 55 non-Indigenous community residents of central  
15 Australia.  
16

17 Outcome measures: The effects of NCDs on risk of infection and death were determined  
18 after stratifying by ethnicity.  
19

20 Results: Mean annual BSI incidence rates were far higher among Indigenous residents  
21 (Indigenous, 937 per 100,000; non-Indigenous, 64 per 100,000 person-years; IRR=14.6;  
22 95% CI=14.61-14.65,  $p<0.001$ ). Indigenous patients were also more likely to have  
23 previous bacterial infections (68.7% versus 34.6%; respectively,  $p<0.001$ ), diabetes  
24 (44.3% versus 20.0%;  $p<0.001$ ), harmful alcohol consumption (37.0% versus 12.7%;  
25  $p<0.001$ ) and other communicable diseases (HTLV-1, 45.2%; strongyloidiasis, 36.1%;  
26 HBV, 12.9%). Among Indigenous patients, diabetes increased odds of current  
27 *Staphylococcus aureus* BSI (OR=1.6, 95% CI=1.0-2.5) and prior skin infections (adjusted  
28 OR=2.1, 95% CI=1.4-3.3). Harmful alcohol consumption increased odds of current  
29 *Streptococcus pneumoniae* BSI (OR=1.57, 95% CI=1.02-2.40) and of previous BSI  
30 (OR=1.7, 95% CI=1.1-2.5), skin infection (OR=1.7, 95% CI=1.1-2.6) or pneumonia  
31 (OR=4.3, 95% CI=2.8-6.7). Twenty-six percent of Indigenous patients died at a mean  
32  
33  
34  
35  
36  
37  
38  
39  
40  
41  
42  
43  
44  
45  
46  
47  
48  
49  
50  
51  
52  
53  
54  
55  
56  
57  
58  
59  
60

1  
2  
3 2 (SD) age of 47±15 years. Complications of diabetes and harmful alcohol consumption  
4  
5  
6 3 predicted 28-day mortality (non-rheumatic heart disease, HR=2.9; 95% CI=1.4-6.2;  
7  
8 4 chronic renal failure, HR=2.6, 95%CI=1.0-6.5; chronic liver disease, HR=3.3, 95%  
9  
10 5 CI=1.6-6.7).

11  
12 6 Conclusion: In a socially disadvantaged population undergoing a rapid epidemiologic  
13  
14 7 transition, NCDs are associated with an increased risk of infection and BSI related  
15  
16 8 mortality. Complex interactions between communicable diseases and NCDs demand an  
17  
18 9 integrated approach to management, which must include the empowerment of affected  
19  
20 10 populations to promote behavioural change.  
21  
22  
23  
24  
25  
26  
27  
28  
29  
30  
31  
32  
33  
34  
35  
36  
37  
38  
39  
40  
41  
42  
43  
44  
45  
46  
47  
48  
49  
50  
51  
52  
53  
54  
55  
56  
57  
58  
59  
60

## Article Summary

### Article Focus

- Remote dwelling, Indigenous Australians are undergoing a rapid epidemiological transition, which is accompanied by a rising burden of non-communicable diseases (NCDs).
- In this setting of social disadvantage and frequent pathogen exposure, NCDs may increase risk of infection and infection-related death.

### Key Messages

- We reveal substantial racial disparities in rates of infection and of NCDs, reflecting the dual burden of disease that affects this Indigenous population.
- NCDs were associated with an increased risk of blood stream infections with some pathogens, previous infections that provide portals of entry for life-threatening invasive disease and infection-related mortality.
- Complex interactions between communicable diseases and NCDs demand an integrated approach to management, which must include the empowerment of affected populations to promote behavioural change.

### Strengths and limitations of this study

- This hospital-based study only includes patients who were admitted with a blood stream infection. We are therefore unable to determine the actual risk of blood stream infections that is attributable to NCDs or to comment on background rates of other infections that might be treated in the community.
- The major strength of our study lies in the demography of the study population, which is served by a single hospital, and the extensive nature of the clinical

1  
2  
3 2 material on which our analysis is based.  
4  
5  
6 3  
7  
8  
9  
10  
11  
12  
13  
14  
15  
16  
17  
18  
19  
20  
21  
22  
23  
24  
25  
26  
27  
28  
29  
30  
31  
32  
33  
34  
35  
36  
37  
38  
39  
40  
41  
42  
43  
44  
45  
46  
47  
48  
49  
50  
51  
52  
53  
54  
55  
56  
57  
58  
59  
60

## 2 Introduction

3 Complex interactions between the demographic, economic and sociologic determinants  
4 of disease result in changing patterns of health and disease over time<sup>1</sup>. The development  
5 of modern social and economic structures, for example, has been associated with a  
6 reduction in infectious diseases and nutritional deficiencies and a corresponding rise in  
7 non-communicable diseases (NCDs) that are associated with ageing and lifestyle factors<sup>1</sup>.  
8 In many developing countries the rapidity of this 'epidemiologic transition' has resulted  
9 in a dramatic increase in NCD prevalence among populations that have a substantial pre-  
10 existing infectious disease burden<sup>2,3</sup>. This phenomenon proceeds at different rates  
11 according to the socioeconomic status of particular sub-groups within a given population  
12 and may reinforce established health inequalities<sup>4,5</sup>.

13  
14 Among Indigenous people, forced displacement, the collapse of Indigenous economies  
15 and the destruction of socio-political structures have been the shared experience of  
16 colonization<sup>6</sup>. Indigenous people living within developed countries continue to live in  
17 poverty and experience a 'protracted' epidemiologic transition<sup>4</sup> that is associated with a  
18 double burden of communicable and non-communicable diseases<sup>7,8</sup> similar to that of  
19 many developing countries<sup>2</sup>. In central Australia, for example, diabetes and other NCDs  
20 are the major contributors to racial disparities in mortality<sup>8</sup> and to a life expectancy that  
21 remains 14 years less for Indigenous Australian men relative to their non-Indigenous  
22 peers<sup>9</sup>. A high burden of infectious diseases persists in this Indigenous population.  
23 Incidence rates of sepsis<sup>10</sup>, blood stream infections<sup>11</sup> and childhood pneumonia<sup>12</sup>, and  
24 prevalence rates of bronchiectasis<sup>13</sup> are the highest reported worldwide. Strongyloidiasis

1  
2  
3 and chronic viral infections, such as with hepatitis B virus (HBV) and the Human T-  
4  
5  
6  
7  
8  
9  
10  
11  
12  
13  
14  
15  
16  
17  
18  
19  
20  
21  
22  
23  
24  
25  
26  
27  
28  
29  
30  
31  
32  
33  
34  
35  
36  
37  
38  
39  
40  
41  
42  
43  
44  
45  
46  
47  
48  
49  
50  
51  
52  
53  
54  
55  
56  
57  
58  
59  
60

2 and chronic viral infections, such as with hepatitis B virus (HBV) and the Human T-  
3 Lymphotropic Virus 1 (HTLV-1), are also common <sup>11</sup>. Population-based infection-related  
4 mortality rates for Indigenous adults in central Australia therefore remain higher than  
5 those of some African countries prior to the current HIV pandemic and the median age of  
6 in-hospital death is only 48 years <sup>14</sup>.

7  
8 Interactions between communicable diseases and NCDs have been little studied;  
9 however, an appreciable effect of NCDs on infection rates is likely where pathogen  
10 exposure is frequent. Diabetes, for example, contributes to the risk of serious bacterial  
11 infections including *Streptococcus pneumoniae*<sup>15</sup> and *Staphylococcus aureus* <sup>16</sup>, which  
12 are common pathogens in overcrowded Indigenous Australian communities <sup>11</sup>. The NCD  
13 burden may therefore have a substantial impact on infection rates and outcomes where  
14 these two epidemics coincide. Such an interaction could reverse health gains in  
15 populations undergoing a rapid epidemiologic transition and exacerbate health  
16 inequalities among disadvantaged subgroups within developed countries. The recent  
17 description in New Zealand of an increasing divergence in infection-related  
18 hospitalization rates according to social status is consistent with this possibility and  
19 challenges health transition theory <sup>17</sup>.

20  
21 Central Australia is well placed to study interactions between poverty, NCDs and  
22 infectious diseases. Most Indigenous residents live in remote communities in conditions  
23 of considerable socio-economic disadvantage, leaving a minority within the major  
24 regional township of Alice Springs. The latter have ready access to a well-resourced

1  
2  
3 2 medical facility, Alice Springs Hospital (ASH), which has sophisticated diagnostic  
4  
5 3 capabilities and provides specialist medical care to a region of 1,000,000 km<sup>2</sup>. Indigenous  
6  
7 4 residents of Alice Springs dwell in either overcrowded ‘town camps’, which have poor  
8  
9 5 amenities and limited refuse disposal, or are integrated with the majority of the non-  
10  
11 6 Indigenous population within the township’s suburbs. Indigenous adults living in town  
12  
13 7 camps and remote communities are often unemployed, have limited education and poor  
14  
15 8 health literacy<sup>18</sup>. Among Indigenous adult residents of town camps, nearly half have 8  
16  
17 9 years or less schooling, labour participation rates are less than 20% and only 12% are  
18  
19 10 employed <sup>19</sup>. Despite an extremely complex regulatory framework and numerous  
20  
21 11 Government attempts to minimize risk, harmful alcohol consumption in this setting  
22  
23 12 remains common <sup>20</sup>.  
24  
25  
26  
27  
28  
29  
30  
31

32 14 The Indigenous population of central Australia also has among the highest blood stream  
33  
34 15 infection incidence rates reported <sup>11</sup>. Living conditions that increase the risk of pathogen  
35  
36 16 exposure <sup>21</sup> and high background rates of focal infections, which provide portals of entry  
37  
38 17 for bacterial invasion, are likely to precede these life-threatening infections. Blood stream  
39  
40 18 infection incidence rates therefore provide measurable end-points to which environmental  
41  
42 19 and host factors contribute. Here we report the infectious and non-communicable disease  
43  
44 20 burden among community residents of central Australia who presented with a blood  
45  
46 21 stream infection and determine risk factors for infection and death after stratifying by  
47  
48 22 ethnicity.  
49  
50  
51  
52

53 23  
54  
55  
56  
57  
58  
59  
60



## 2 **Methods**

3 We conducted a retrospective review of all positive blood cultures collected from adult  
4 patients (age $\geq$ 15 years) admitted to ASH between 1<sup>st</sup> January 2001 and 31<sup>st</sup> June 2007. In  
5 July 2007 the Australian Federal Government suspended racial discrimination legislation  
6 and implemented an 'Emergency Response' that resulted in considerable uncertainty  
7 among Indigenous residents<sup>22</sup>. This raised concerns that the central Australian resident  
8 population could change as people moved interstate to escape these restrictions and no  
9 data was collected after this date. Data collected included organism, ethnicity, dates of  
10 birth, dates of death, indigenous status and place of residence. For patients who presented  
11 between 1<sup>st</sup> January 2003 and 31<sup>st</sup> June 2007 we also obtained ICD 10 morbidity codes  
12 and the results of microbiological and radiological investigations for each admission for 5  
13 years prior to the final BSI presentation. NCDs were derived from ICD-10 morbidity  
14 codes for diabetes, harmful alcohol consumption, >stage 2 chronic kidney disease,  
15 ischaemic heart disease, chronic liver disease and malignancy. Bronchiectasis was  
16 diagnosed radiologically using American College of Chest Physician criteria. Heart  
17 failure and valvular heart disease, including rheumatic heart disease (RHD), were  
18 diagnosed by trans-thoracic echocardiography. Ischaemic heart disease and cardiac  
19 failure were combined ('non-rheumatic heart disease') for statistical analysis.

## 21 *Definitions*

### 22 Residence

23 Place of residence was categorized as i) remote (>100 km from Alice Springs), ii) Alice  
24 Springs town camp and iii) urban (resident in Alice Springs, but not in a town camp).

1  
2  
3 2 Nursing home residents were included in calculations of BSI incidence rates, but  
4  
5 3 excluded from further analysis because the primary study objective was to determine risk  
6  
7 4 factors for infection and death among community residents.  
8  
9 5

## 6 Infections

7 A blood culture from which a pathogen was isolated was defined as a 'BSI episode'.  
8 Repeated culture of the same organism from blood culture was regarded as a separate  
9 'episode' only if blood samples were drawn more than one month apart. Blood stream  
10 infections were defined as community-acquired if a pathogen was isolated from blood  
11 cultures drawn within 48 hours of admission and nosocomial if isolated from blood  
12 cultures drawn after this time. Foci of infection were determined where possible from  
13 ICD-10 morbidity codes in association with pathology and imaging results for each  
14 admission for five years prior to the final BSI during the study period. A diagnosis of  
15 pneumonia was made if there was radiological evidence of consolidation and this was  
16 attributed to the pathogen isolated from blood cultures if the same organism was also  
17 isolated from sputum or the blood culture isolate was an organism typically associated  
18 with pneumonia, such as *Streptococcus pneumoniae*. Blood stream infections excluded  
19 infections with potential contaminants including coagulase negative staphylococci,  
20 bacillus spp., coryneforms and viridans streptococci unless grown from more than one  
21 BC in a 24 hour period, as were *Acinetobacter sp* in the absence of an identifiable focus.

22  
23  
24  
25  
26  
27  
28  
29  
30  
31  
32  
33  
34  
35  
36  
37  
38  
39  
40  
41  
42  
43  
44  
45  
46  
47  
48  
49  
50  
51  
52  
53  
54  
55  
56  
57  
58  
59  
60

1  
2  
3 2 The study was approved by the Central Australian Human Research Ethics Committee  
4  
5 3 (www.health.nt.gov.au/Agency/Advisory\_Groups\_and\_Taskforces/Human\_Research\_Et  
6  
7  
8 4 hics\_Committee/index.aspx).  
9

10  
11 5

12  
13 6 *Statistics.*

14  
15 7 All associations were assessed using data obtained for the final BSI admission within the  
16  
17 8 study period. Univariate analysis for categorical data was performed using Chi-squared  
18  
19 9 statistics and Fishers Exact where appropriate. Multivariate analysis was performed using  
20  
21 10 binary logistic regression. Short (28-day) and long term survival analysis following the  
22  
23 11 final BSI episode in the study period was performed using the log-rank statistic for  
24  
25 12 univariate analysis and Cox regression for multivariate analysis. We calculated the annual  
26  
27 13 population-based incidence rates for 2001-2006 for the combined Alice Springs and  
28  
29 14 Anangu Pitjantjatjara Yankunyatjara (APY) land areas using the total number of BSI  
30  
31 15 presentations each year as the numerator. The denominator used was the estimated Adult  
32  
33 16 resident population obtained from Australian Bureau of Statistics 2006 census data for  
34  
35 17 the Alice Springs region combined with that of the neighbouring APY land areas. To  
36  
37 18 enable analysis according to place of residence this population was further divided into  
38  
39 19 that of i) the Alice Springs urban area excluding town camps (Indigenous 2898, non-  
40  
41 20 Indigenous 18471), ii) Alice Springs town camps, including that of a closely affiliated  
42  
43 21 neighbouring community (Indigenous, 1482), and iii) the Alice Springs rural area  
44  
45 22 (Indigenous, 8925; non-Indigenous, 2775), which included that for the APY land areas  
46  
47 23 (Indigenous= 1302, non-Indigenous=294).  
48  
49  
50  
51  
52  
53  
54  
55  
56  
57  
58  
59  
60

2

### 3 **Results**

#### 4 *Patient demographics*

5 558 Indigenous and 55 non-indigenous adult community residents presented to ASH with  
6 a BSI between January 2003 and July 2007. Detailed demographic, clinical and  
7 microbiological data are described in Table 1. Indigenous patients were younger  
8 (Indigenous, 44.7±15.2; non-Indigenous, 57.5±21.1; p<0.001), more likely to be female  
9 (Indigenous, 58.1%; non-Indigenous, 41.8%; p<0.03) and to live in a town camp or  
10 remote community (Indigenous, 84.0%; non-Indigenous, 0; p<0.001). Non-  
11 communicable diseases including diabetes (Indigenous, 44.3%; non-Indigenous, 20.0%;  
12 p<0.001) and harmful alcohol consumption (Indigenous, 37.0%; non-Indigenous, 12.7%;  
13 p<0.001) were more common among Indigenous patients, while non-Indigenous patients  
14 were more likely to have ischaemic heart disease (Indigenous, 3.4%; non-Indigenous,  
15 31.6%; p<0.001), malignancy (Indigenous, 2.3%; non-Indigenous, 20.0%; p<0.001), to  
16 be receiving palliative care (Indigenous, 1.8%; non-Indigenous, 9.1%; p=0.001) and to  
17 have a history of intravenous drug use (Indigenous, 0; non-Indigenous, 5.5%; p=0.001).  
18 Forty-seven (8.4%) Indigenous and 5 (9.3%) non-indigenous BSI episodes were  
19 nosocomial (Table 1).

20

#### 21 *Population-based incidence rates 2001-2006*

22 The overall population-based BSI incidence rate for the Alice Springs area between 2001  
23 and 2006 was nearly 15 higher for Indigenous adults (937 per 100,000 person-years) than  
24 for non-Indigenous adults (64 per 100,000 person-years) (IRR=14.6; 95% CI, 14.61,

1  
2  
3 14.65;  $p < 0.001$ ). Incidence rates for Indigenous town camp residents (2,794/100,000  
4 person-years) were more than 40 times higher than those of non-Indigenous urban  
5 residents (64/100,000 person years) (IRR=43.6, 95% CI=43.57-43.65,  $p < 0.001$ ) and at  
6 least three times higher than those of urban dwelling Indigenous adults (IRR=3.421, 95%  
7 CI=3.418-3.423,  $p < 0.001$ ) or those from remote communities (IRR=3.87, 95% CI=3.864-  
8 3.868,  $p < 0.001$ ) (Fig 1).  
9

### 10 *Microbial Aetiology*

11 *Escherichia coli* and *S.aureus* were the most common pathogens causing BSI in both  
12 ethnic groups. Methicillin-resistant *S.aureus* (Indigenous, 53 (5.2%); non-Indigenous, 1  
13 (0.9%);  $p < 0.001$ ) and *S.pneumoniae* (Indigenous, 136 (13.2%); non-Indigenous, 8  
14 (5.9%);  $p < 0.001$ ) were more common among Indigenous patients (Table 1).  
15

16 Risk factors for BSI were determined for pathogens contributing more than 5% of all BSI  
17 episodes (Table 2). Diabetes was more common among Indigenous patients with a  
18 *S.aureus* BSI during their final BSI admission (20.2% versus 13.5%; OR=1.6 (1.04, 2.53;  
19  $p = 0.03$ ) (Table 2). In contrast, increased risk of *Streptococcus pneumoniae* BSI was  
20 associated with harmful alcohol consumption, while risk was reduced among patients  
21 with diabetes or those receiving haemodialysis (Table 2). Risk of BSI with other major  
22 pathogens (*E.coli*, *Klebsiella pneumoniae* or *Streptococcus pyogenes*) was not increased  
23 by any NCD (Table 2).  
24

### 25 *Concurrent infections*

1  
2  
3 2 During their final BSI admission, Indigenous patients more often had an additional focus  
4  
5 3 of bacterial infection unrelated to the presenting BSI (Indigenous, n=69 (12.4%); non-  
6  
7 4 Indigenous, n=2 (3.6%); p=0.05) (Table 1). Infections with HTLV-1 (45.2%),  
8  
9 5 *S.stercoralis* (36.1%) and hepatitis B virus (anti-HBc, 62.5%; HBsAg, 12.9%) were also  
10  
11 6 more common among Indigenous patients (Table 1). *Sarcoptes scabiei* infestations were  
12  
13 7 only found in Indigenous patients (n=20; 4.0%) (Table 1).  
14  
15  
16  
17  
18  
19

### 20 *Previous infections*

21  
22 10 Excluding Indigenous patients who were at increased risk of recurrent infection  
23  
24 11 (haemodialysis, 83; bronchiectasis, 27) and those residing outside the Alice Springs  
25  
26 12 region who could not be followed-up (17), 296 of 431 (68.7%) Indigenous adults were  
27  
28 13 admitted with an acute infection during the five years prior to the final BSI admission  
29  
30 14 (Table 3). Significantly more common among Indigenous patients were pneumonia,  
31  
32 15 previous BSI, skin abscesses and wound infections (Table 3). Predisposing factors for  
33  
34 16 previous infection-related admissions included diabetes (previous skin infections),  
35  
36 17 harmful alcohol consumption (previous skin infections, pneumonia and BSI) and stage 3-  
37  
38 18 4 chronic kidney disease (any previous infection) (Table 4).  
39  
40  
41  
42  
43  
44

### 45 *Mortality*

#### 46 *28 day mortality*

47  
48 21 Overall 28-day mortality rates following a BSI were 11.7% and 11.4% for Indigenous  
49  
50 22 and non-Indigenous adults, respectively. Mortality rates among Indigenous patients were  
51  
52 23 highest for town camp residents (Fig 2) and varied according to pathogen. Among the  
53  
54  
55  
56  
57  
58  
59  
60

1  
2  
3 major pathogens causing BSI, most often fatal within the first 28 days was *K.pneumoniae*  
4 infection (40.0%) followed by *S.pneumoniae* (9.6%) *S.aureus* (8.0%), and *E.coli* (5.0%)  
5 ( $\chi^2=39.1$ , 4df;  $p<0.001$ ). Case fatality rates according to focus of infection were  
6 pneumonia (21.5%), pyelonephritis (8.9%) and skin infections (7.2%) ( $\chi^2=14.5$ , 3df;  
7  $p=0.002$ ).

### 8 *1. Community-acquired BSI amongst Indigenous patients*

9 Non-communicable diseases including chronic liver disease, non-rheumatic heart disease  
10 and chronic kidney disease were independent predictors of death (Table 5). Relative to  
11 patients with *E.coli* BSI, both *S.aureus* (HR=2.7, 95% CI=1.0-7.3;  $p=0.05$ ) and  
12 *S.pneumoniae* (HR=13.4, 95% CI=4.6-39.2;  $p<0.001$ ) were independently associated  
13 with an increased risk of death (Table 5).

### 14 *2. Nosocomial BSI amongst Indigenous patients*

15 In univariate analysis, place of residence ( $p=0.04$ ) was a predictor of short-term mortality.  
16 Within the first 28 days of admission, town camp residents were more likely to die (7 of  
17 11=64%) relative to other township (0 of 6=0.0%) or remote residents (14 of 30=46.7%)  
18 ( $p=0.039$ ). In multivariate analysis, place of residence remained an independent predictor  
19 ( $p<0.001$ ) and there was also an increased risk in those with non-rheumatic heart disease  
20 (HR=4.6, 95% CI=1.2,17.6;  $p=0.03$ ), a primary focus of pneumonia (HR=6.0, 95%  
21 CI=1.5, 24.5) and those with a previous BSI (HR=3.8, 95% CI=1.4, 10.3;  $p=0.008$ ).

### 22 *3. Nosocomial and Community acquired BSI amongst non-Indigenous patients*

1  
2  
3 2 In multivariate analysis, only non-rheumatic heart disease was an independent predictor  
4  
5 3 of short-term mortality amongst non-indigenous patients with a community-acquired BSI  
6  
7  
8 4 (HR=12.5, 95% CI=1.0, 150.3;  $p<0.05$ ). There were 3 deaths within 28 days amongst 12  
9  
10 5 non-indigenous patients with non-rheumatic heart disease and 3 deaths amongst 56  
11  
12 6 patients without non-rheumatic heart disease. Numbers of nosocomial BSI amongst non-  
13  
14 7 indigenous patients were too few ( $n=5$ ) to attempt survival analysis.  
15  
16  
17  
18  
19

### 20 9 *Long-term mortality*

21  
22 10 One-hundred and forty-five (26.0%) Indigenous and 15 (27.3%) non-Indigenous patients  
23  
24 11 died during the 2,056 years of follow-up at a mean  $\pm$  SD age of  $47\pm 15$  and  $68\pm 21$  years  
25  
26 12 ( $p<0.001$ ), respectively. Amongst Indigenous patients, mortality rates were again highest  
27  
28 13 amongst those from town camps (Log-rank  $\chi^2=5.05$ ,  $p=0.08$ ) (Fig 2).  
29  
30  
31  
32  
33

34 15 Among Indigenous patients, NCDs (non-rheumatic heart disease, chronic kidney disease,  
35  
36 16 chronic liver disease and malignancy) and BSI with *S.aureus* and *S.pneumoniae* were  
37  
38 17 independent predictors of long-term mortality following community-acquired BSI (Table  
39  
40 18 5). Residence in a town camp (town camp, 7 of 11; local residence, 0 of 6; remote areas,  
41  
42 19 14 of 30;  $\chi^2=6.5$ , 2df;  $p=0.04$ ) and BSI with *K.pneumoniae* BSI (HR=4.0, 95% CI=1.5,  
43  
44 20 11.2;  $p=0.007$ ) were the only univariate predictors of long-term mortality for nosocomial  
45  
46 21 BSI's amongst Indigenous patients.  
47  
48  
49  
50  
51  
52  
53  
54  
55  
56  
57  
58  
59  
60



1  
2  
3 2 There were no independent predictors of long-term mortality for non-Indigenous patients  
4  
5  
6 3 with community acquired infections and too few non-indigenous patients with  
7  
8 4 nosocomial BSI's (n=5) to perform long-term survival analysis.  
9  
10  
11 5  
12  
13  
14  
15  
16  
17  
18  
19  
20  
21  
22  
23  
24  
25  
26  
27  
28  
29  
30  
31  
32  
33  
34  
35  
36  
37  
38  
39  
40  
41  
42  
43  
44  
45  
46  
47  
48  
49  
50  
51  
52  
53  
54  
55  
56  
57  
58  
59  
60

2

### 3 Discussion

4 The Indigenous adult population of central Australia has among the highest BSI  
5 incidence rates worldwide. Relative to their non-Indigenous peers, rates for Indigenous  
6 adults were nearly 15-fold higher overall and 40-fold higher among Indigenous town  
7 camp residents. A high burden of other infections, particularly repeated respiratory and  
8 skin infections, provide portals of entry for life-threatening invasive bacterial disease.  
9 Nearly 70% of Indigenous patients required admission for an acute infection in the  
10 preceding five years, 24.4% experienced a prior BSI and a second unrelated bacterial  
11 infection was found in 12.4% of patients. Chronic viral and parasitic infections were also  
12 common. Among Indigenous adults who were tested, more than 60% had been infected  
13 with Hepatitis B virus, 13% remained HBsAg positive, nearly half were HTLV-1  
14 seropositive and 36% were *S.stercoralis* seropositive. A similar burden of infection is  
15 experienced by Indigenous children amongst whom frequent co-infection with bacterial  
16 pathogens and parasites<sup>23</sup> contributes to 'failure-to-thrive'<sup>24</sup>. In our adult cohort, 26.0%  
17 of Indigenous patients died during the study period at a mean age of only 47 years.  
18 Although we were unable to attribute cause of death in the present study, 60% of  
19 Indigenous deaths at ASH are infection-related<sup>14</sup>.

20

21 High prevalence rates of non-communicable diseases were also found in our Indigenous  
22 cohort. These included diabetes, harmful alcohol consumption, chronic lung disease and  
23 end-stage kidney disease, all of which increase the risk of bacterial infection<sup>16,25, 15, 26</sup>.  
24 Invasive pneumococcal disease (IPD), for example, is three, 5.6 and 7-11 times more

1  
2  
3 2 common among patients with diabetes<sup>15</sup>, chronic lung disease<sup>15</sup> and alcohol dependence  
4  
5 15,27, respectively. Alcohol dependence and diabetes also increase risk of a BSI requiring  
6  
7  
8 4 intensive care nearly six-fold and haemodialysis increases risk several hundred fold<sup>26</sup>,  
9  
10 5 largely due to prolonged central venous access<sup>28</sup>. In the present study, rates of diabetes  
11  
12 6 among Indigenous adults were nearly three times reported background rates<sup>29</sup>. Diabetes  
13  
14 7 was associated with *S.aureus* BSI and with previous skin infections, but not with  
15  
16 8 *S.pneumoniae* BSI. Stage 3-4 chronic kidney disease, which is most often a complication  
17  
18 9 of diabetes in our patient population<sup>30</sup>, was associated with any previous infection.  
19  
20 10 Harmful alcohol consumption was associated with *S.pneumoniae* BSI and with previous  
21  
22 11 infection-related admissions. Non-communicable diseases, including non-rheumatic heart  
23  
24 12 disease, chronic kidney disease and chronic liver disease, were also major predictors of  
25  
26 13 mortality after a BSI. However, once invasive infections were established, *S.aureus* and  
27  
28 14 *S.pneumoniae* predicted death independently of any underlying medical condition.  
29  
30  
31  
32  
33  
34  
35  
36  
37  
38  
39  
40  
41  
42  
43  
44  
45  
46  
47  
48  
49  
50  
51  
52  
53  
54  
55  
56  
57  
58  
59  
60

16 The present study has compared risk of non-communicable diseases among patients  
17 presenting with a BSI and cannot determine the population-based risks attributable to  
18 these conditions. Nevertheless, racial disparities in NCD prevalence are unlikely to fully  
19 account for the BSI incidence rate ratios reported here, nor do regional differences in  
20 their prevalence<sup>29</sup> explain IPD incidence rates that are twice as high among Indigenous  
21 residents of central Australia relative to those of the tropical north<sup>31</sup>. In the USA, higher  
22 IPD incidence rates among Black Americans<sup>15,32</sup> are more robustly associated with  
23 poverty than race<sup>32</sup>. An increased risk of *S.aureus* infection has also been reported  
24 among those of lower socio-economic position<sup>33-35</sup> and infection-related hospital

1  
2  
3 2 admissions in New Zealand are associated with social deprivation<sup>17</sup>. The socioeconomic  
4  
5 3 circumstances of Indigenous Australians are therefore likely to further increase the  
6  
7 4 infection risks associated with non-communicable diseases.  
8  
9 5

10 6 Social disadvantage predisposes to non-communicable diseases<sup>36, 37</sup> while increasing  
11 7 pathogen exposure and limiting opportunities to implement behavioural strategies that  
12 8 ameliorate risk<sup>38</sup>. In some Indigenous Australian communities the average number of  
13 9 people living per house is 17<sup>39</sup> and non-functioning health hardware leads to  
14 10 environmental conditions that are detrimental to householders<sup>21</sup>. Overcrowded housing<sup>40</sup>  
15 11 and an inability to maintain adequate skin hygiene<sup>21</sup> contribute to high rates of  
16 12 pyoderma. More than 40% of Indigenous patients in the present study were previously  
17 13 admitted with skin infections, which are the most common primary focus for *S.aureus*  
18 14 bacteraemia in this population<sup>41</sup>. Scabies, a recognized cause of *S.aureus* and  
19 15 Streptococcal pyoderma<sup>40,42</sup>, affected 4% of our cohort. Streptococcal pyoderma  
20 16 underlies most cases of RHD in the Northern Territory<sup>39</sup> and this was confirmed  
21 17 echocardiographically in 2% of our Indigenous cohort. Similarly, the transmission of  
22 18 respiratory pathogens is promoted by household crowding<sup>43</sup> and nearly 40% of  
23 19 Indigenous adults were admitted previously with pneumonia. Environmental  
24 20 contamination<sup>24</sup>, inadequate sanitation and unhygienic food preparation areas<sup>21</sup>  
25 21 contribute to infection with enteric pathogens and *S.stercoralis*. The risks of complicated  
26 22 strongyloidiasis, crusted scabies<sup>44</sup> and bronchiectasis<sup>13</sup> are further increased by HTLV-1  
27 23 infection; however, no attempt has been made to control transmission of this virus among  
28 24 Indigenous Australians. These effects are compounded by poor health literacy and  
29  
30  
31  
32  
33  
34  
35  
36  
37  
38  
39  
40  
41  
42  
43  
44  
45  
46  
47  
48  
49  
50  
51  
52  
53  
54  
55  
56  
57  
58  
59  
60

1  
2  
3 2 Indigenous adults are less likely to engage with a conventional medical paradigm<sup>18</sup>.  
4  
5  
6 3 Delays in seeking care for uncomplicated urinary tract infections may therefore  
7  
8 4 contribute to the very high gram negative BSI incidence rates reported here.  
9  
10 5

11  
12 6 The retrospective design of this study results in a number of limitations. Firstly, only  
13  
14 7 limited demographic information is collected by ASH and the Indigenous population is  
15  
16 8 relatively mobile. Residents of remote communities, for example, frequently stay in town  
17  
18 9 camps and this is not recorded by ASH. The effect of town camp residence may therefore  
19  
20 10 be underestimated if large numbers of remote residents acquire infection during these  
21  
22 11 visits. Although foci of infection were determined by reviewing the results of  
23  
24 12 microbiology and imaging for each presentation, these varied between patients according  
25  
26 13 to the practice of the treating physician. The number of patients with concurrent bacterial  
27  
28 14 infections and medical conditions, such as RHD, may therefore be underestimated.  
29  
30 15 Similarly, seropositivity rates for infections, such as HBV and HTLV-1, could only be  
31  
32 16 determined for a subset of patients. A further limitation is the identification of NCDs and  
33  
34 17 previous infections using ICD-10 codes; however, coding errors are unlikely to vary  
35  
36 18 systematically according to ethnicity or place of residence. The use of ICD-10 codes  
37  
38 19 does, however, limit our ability to study factors that are more difficult to define and  
39  
40 20 which might also influence infection risk, such as nutrition and health literacy. Finally,  
41  
42 21 the present study has demonstrated an increased risk of infection and death associated  
43  
44 22 with town camp residence. This occurred despite better access to health care relative to  
45  
46 23 remote residents and little difference in crude measures of socioeconomic deprivation<sup>7</sup>.  
47  
48 24 For community-acquired BSIs, risk of death was strongly associated with NCDs;  
49  
50  
51  
52  
53  
54  
55  
56  
57  
58  
59  
60

1  
2  
3 however, these conditions did not fully account for the increased risk following a  
4 nosocomial BSI. Unmeasured socioeconomic factors might contribute to increased  
5 mortality among town camp residents; however, recent research linking health outcomes  
6 to perceived racism<sup>45</sup> may also be relevant to this marginalized population.  
7  
8  
9  
10  
11  
12  
13

14  
15 The disease burden among the Indigenous population of central Australia is similar to  
16 that of many developing countries where NCD prevalence rates are rising rapidly in a  
17 setting of persistently high infection rates<sup>2,46</sup>. Recently, the validity of conventional  
18 health transition theory has been challenged by findings that infection-related  
19 hospitalization rates are increasing among the most socially disadvantaged community  
20 members in a developed country<sup>17</sup>. The present study provides a possible explanation for  
21 this observation and further suggests that, in contrast to the orderly epidemiological  
22 transition envisaged by Omran (1971)<sup>1</sup>, life expectancy may fall where social deprivation  
23 persists in the face of a rising prevalence of non-communicable diseases. High BSI  
24 incidence rates among Indigenous Australians were associated with a heavy burden of  
25 other infections that provide portals of entry for invasive bacterial disease. Improving life  
26 expectancy in this setting will require public health initiatives to reduce pathogen  
27 exposure in addition to controlling the burgeoning non-communicable disease burden.  
28  
29  
30  
31  
32  
33  
34  
35  
36  
37  
38  
39  
40  
41  
42  
43  
44  
45  
46  
47  
48  
49  
50  
51  
52  
53  
54  
55  
56  
57  
58  
59  
60  
Diabetes, harmful alcohol consumption and organ damage resulting from these conditions  
increased both the likelihood of infection and the subsequent risk of death. Both  
conditions are included in proposed international management strategies to control the  
non-communicable disease crisis<sup>37</sup>. However, our findings also illustrate the complexity  
of interactions between communicable and non-communicable diseases and support calls

1  
2  
3 2 for an integrated approach to disease management <sup>47</sup>. The intimate association between  
4  
5  
6 3 these conditions and human behaviour renders the empowerment of affected populations  
7  
8 4 to adopt protective health-related strategies critical to the success of any management  
9  
10 5 program <sup>47</sup>.  
11  
12  
13 6  
14  
15  
16  
17  
18  
19  
20  
21  
22  
23  
24  
25  
26  
27  
28  
29  
30  
31  
32  
33  
34  
35  
36  
37  
38  
39  
40  
41  
42  
43  
44  
45  
46  
47  
48  
49  
50  
51  
52  
53  
54  
55  
56  
57  
58  
59  
60

1  
2  
3 **2 Contributions:**  
4

5 LE designed the study, collected the data, assisted with statistical analysis and prepared  
6 the manuscript, LF and SJ collected the data, AB assisted in manuscript preparation and  
7  
8 RW was responsible for statistical analysis and assisted in manuscript preparation.  
9  
10  
11  
12

13  
14  
15 **7 Acknowledgments:**  
16

17 We wish to thank Dr S.Guthridge, Department of Health Gains Planning, Northern  
18 Territory Government, for providing the population data.  
19  
20  
21

22  
23 **10 Conflict-of-interest** :\_None reported  
24

25  
26 **11 Funding statement:**  
27

28 This study received funding from the Northern Territory Rural Clinical School, which is  
29 an initiative of the Australian Department of Health and Ageing.  
30  
31

32  
33 **14 Data sharing:** Data relate to Indigenous Australians and cannot be shared without  
34 specific approval from the relevant Indigenous communities and the responsible HREC.  
35  
36 Obtaining such approval will require detail of all individuals seeking access and each  
37  
38 research project for which the inclusion of this data is proposed.  
39  
40  
41  
42  
43  
44  
45  
46  
47  
48  
49  
50  
51  
52  
53  
54  
55  
56  
57  
58  
59  
60



Table 1 Demographics and comorbidities for indigenous and non-indigenous BSI patients  
2003-2007.

|                                    | <b>Indigenous<br/>(n=558)</b> | <b>Non-<br/>indigenous<br/>(n=55)</b> | <b>p-value for<br/>difference</b> |
|------------------------------------|-------------------------------|---------------------------------------|-----------------------------------|
| Age, yrs ( $\pm$ SD)               | 44.7 $\pm$ 15.2               | 57.5 $\pm$ 21.1                       | <0.001                            |
| Gender (M/F)                       | 234/324                       | 31/23                                 | 0.03                              |
| (%)                                | (42/58)                       | (57/43)                               |                                   |
| <b>Residence</b>                   |                               |                                       |                                   |
| Urban                              | 89 (16.0)                     | 55 (100.0)                            |                                   |
| Town Camp                          | 136 (24.4)                    | 0 (0.0)                               |                                   |
| Remote Community                   | 333 (59.7)                    | 0 (0.0)                               | <0.001                            |
| <b>Co-morbidities<sup>a</sup></b>  |                               |                                       |                                   |
| Diabetes                           | 247 (44.3)                    | 11 (20.0)                             | <0.001                            |
| Harmful Alcohol Consumption        | 205 (37.0)                    | 7 (12.7)                              | <0.001                            |
| Chronic Kidney Disease             |                               |                                       |                                   |
| Stage 3-4                          | 34 (6.1)                      | 5 (9.1)                               | 0.39                              |
| Stage 5                            | 83 (14.9)                     | 3 (5.5)                               | 0.06                              |
| Chronic liver disease <sup>b</sup> | 53 (9.6)                      | 6 (10.9)                              | 0.74                              |
| Bronchiectasis                     | 27 (4.8)                      | 0                                     | 0.10                              |
| Congestive Cardiac failure         | 15 (2.7)                      | 3 (5.5)                               | 0.25                              |
| Ischaemic heart disease            | 9 (1.6)                       | 7 (15.2)                              | <0.001                            |
| Valvular Heart Disease             | 27 (4.8)                      | 3 (5.5)                               | 0.84                              |

|    |                                          |            |           |        |
|----|------------------------------------------|------------|-----------|--------|
| 1  |                                          |            |           |        |
| 2  |                                          |            |           |        |
| 3  | Rheumatic heart disease                  | 12 (2.0)   | 0 (0.0)   | 0.27   |
| 4  |                                          |            |           |        |
| 5  | Palliative care                          | 10 (1.8)   | 5 (9.1)   | 0.001  |
| 6  |                                          |            |           |        |
| 7  |                                          |            |           |        |
| 8  | Malignancy                               | 13 (2.3)   | 11 (20.0) | <0.001 |
| 9  |                                          |            |           |        |
| 10 | IVDU                                     | 0 (0.0)    | 3 (5.5)   | 0.001  |
| 11 |                                          |            |           |        |
| 12 |                                          |            |           |        |
| 13 | <b>Community Acquired</b>                | 510 (91.6) | 49 (90.7) | 0.84   |
| 14 |                                          |            |           |        |
| 15 | <b>Primary focus of infection</b>        |            |           |        |
| 16 |                                          |            |           |        |
| 17 | No focus                                 | 250 (44.8) | 20 (36.4) | 0.37   |
| 18 |                                          |            |           |        |
| 19 | Pneumonia <sup>c</sup>                   | 110 (19.7) | 6 (10.9)  | 0.08   |
| 20 |                                          |            |           |        |
| 21 | Skin abscess                             | 66 (11.8)  | 5 (9.1)   | 0.65   |
| 22 |                                          |            |           |        |
| 23 | Pyelonephritis <sup>d</sup>              | 63 (11.3)  | 5 (9.1)   | 0.56   |
| 24 |                                          |            |           |        |
| 25 | Other                                    | 53 (9.5)   | 18 (32.7) | <0.001 |
| 26 |                                          |            |           |        |
| 27 | Enteritis                                | 15 (2.7)   | 1 (1.8)   | 0.71   |
| 28 |                                          |            |           |        |
| 29 | Bone/joint                               | 1 (0.2)    | 0.0 (0.0) | 0.61   |
| 30 |                                          |            |           |        |
| 31 |                                          |            |           |        |
| 32 |                                          |            |           |        |
| 33 |                                          |            |           |        |
| 34 | <b>Additional Infections<sup>e</sup></b> |            |           |        |
| 35 |                                          |            |           |        |
| 36 | Acute bacterial infections               | 69 (12.4)  | 2 (3.6)   | 0.05   |
| 37 |                                          |            |           |        |
| 38 | Pneumonia                                | 18 (3.2)   | 0 (0.0)   | 0.39   |
| 39 |                                          |            |           |        |
| 40 | Urinary tract                            | 20 (3.6)   | 1 (1.8)   | 0.49   |
| 41 |                                          |            |           |        |
| 42 | Skin                                     | 27 (4.8)   | 1 (1.8)   | 0.31   |
| 43 |                                          |            |           |        |
| 44 | Enteritis                                | 4 (0.7)    | 0         | 0.53   |
| 45 |                                          |            |           |        |
| 46 |                                          |            |           |        |
| 47 |                                          |            |           |        |
| 48 | Chronic Viral infections                 |            |           |        |
| 49 |                                          |            |           |        |
| 50 | HTLV-1 <sup>f</sup>                      | 137 (45.2) | 0 (0.0)   | <0.001 |
| 51 |                                          |            |           |        |
| 52 | Hepatitis B virus <sup>f</sup>           |            |           |        |
| 53 |                                          |            |           |        |
| 54 | HBsAg                                    | 49 (12.9)  | 1 (6.7)   | 0.70   |
| 55 |                                          |            |           |        |
| 56 |                                          |            |           |        |
| 57 |                                          |            |           |        |
| 58 |                                          |            |           |        |
| 59 |                                          |            |           |        |
| 60 |                                          |            |           |        |

|                                        |            |           |        |
|----------------------------------------|------------|-----------|--------|
| Anti-HBc                               | 193 (62.5) | 3 (27.3)  | <0.001 |
| <b>Parasites</b>                       |            |           |        |
| Strongyloidiasis <sup>f</sup>          | 78 (36.1)  | 0 (0.0)   | 0.001  |
| Scabies                                | 20 (4.0)   | 0 (0.0)   | 0.24   |
| <b>Mortality</b>                       |            |           |        |
| 28 days                                | 62 (11.1)  | 7 (12.7)  | 0.72   |
| All deaths                             | 145 (26.0) | 15 (27.3) | 0.84   |
| Age of death (years)                   | 47±15      | 68±21     | <0.001 |
| <b>Major BSI Pathogens<sup>g</sup></b> |            |           |        |
| <i>Enterobacteriaceae</i>              | 370 (36.0) | 38 (34.5) | 0.56   |
| <i>Escherichia coli</i>                | 246 (23.9) | 28 (25.5) | 0.37   |
| <i>Klebsiella pneumoniae</i>           | 57 (5.54)  | 2 (1.82)  | 0.09   |
| <i>Staphylococcus aureus</i>           | 191 (18.6) | 20 (18.2) | 0.83   |
| MRSA                                   | 53 (5.15)  | 1 (0.91)  | <0.001 |
| <i>Streptococcus pneumoniae</i>        | 136 (13.2) | 8 (5.88)  | <0.001 |
| <i>Streptococcus pyogenes</i>          | 68 (6.61)  | 8 (7.27)  | 0.42   |
| <i>Haemophilus influenzae</i>          | 22 (2.14)  | 0         | 0.14   |
| Enteric pathogens <sup>h</sup>         | 29 (2.81)  | 1 (0.91)  | 0.27   |

2 a. comorbidities determined from IC-10 discharge morbidity codes

3 b. Chronic liver disease attributed to alcohol (Indigenous, 43; non-Indigenous, 5), chronic  
4 hepatitis B (Indigenous, 10; non-Indigenous, 0) and chronic hepatitis C (Indigenous, 0;  
5 non-Indigenous, 3).

6 c. Chest X-rays performed for 457 Indigenous patients.

- 1  
2  
3 2 d. Respiratory cultures performed for 150 Indigenous patients.  
4  
5  
6 3 e. Urine cultures performed for 310 Indigenous patients.  
7  
8 4 e. Alternative bacterial pathogen isolated.  
9  
10 5 f. Indigenous patients tested: HTLV-1, 309; HBsAg, 388; HBcAb, 309; Strongyloides  
11  
12 6 stercoralis serology, 235. Denominators exclude 6 Indigenous patients with indeterminate  
13  
14 7 HTLV-1 Western blot results and 19 Indigenous patients with borderline Strongyloides  
15  
16 8 serology whose infective status could not be determined.  
17  
18 9 f. Major BSI pathogens responsible for all recorded episodes 2001-2007.  
19  
20 10 g. Includes Salmonella spp., Shigella spp., Campylobacter spp.  
21  
22 11 Abbreviations: CHB, chronic hepatitis B virus; HCV, hepatitis C virus; IVDU,  
23  
24 12 intravenous drug use.  
25  
26  
27  
28  
29  
30  
31  
32  
33  
34  
35  
36  
37  
38  
39  
40  
41  
42  
43  
44  
45  
46  
47  
48  
49  
50  
51  
52  
53  
54  
55  
56  
57  
58  
59  
60

Table 2. Demographic and non-communicable disease associations for the major BSI pathogens among Indigenous adults.

|                  | n   | <i>S.aureus</i> |         |                      | <i>S.pneumonia</i> |         |                      | <i>K.Pneumonia</i> |         |                      | <i>E.Coli</i> |         |                      |
|------------------|-----|-----------------|---------|----------------------|--------------------|---------|----------------------|--------------------|---------|----------------------|---------------|---------|----------------------|
|                  |     | No (%)          | Yes (%) | p-value <sup>1</sup> | No (%)             | Yes (%) | p-value <sup>1</sup> | No (%)             | Yes (%) | p-value <sup>1</sup> | No (%)        | Yes (%) | p-value <sup>1</sup> |
| <b>Residence</b> |     |                 |         |                      |                    |         |                      |                    |         |                      |               |         |                      |
| Urban            | 89  | 86.5            | 13.5    |                      | 89.9               | 10.1    |                      | 96.6               | 3.4     |                      | 76.4          | 23.6    |                      |
| Town Camp        | 136 | 88.2            | 11.8    |                      | 83.1               | 16.9    |                      | 91.9               | 8.1     |                      | 73.5          | 26.5    |                      |
| Remote           | 333 | 80.5            | 19.5    | 0.08                 | 89.2               | 10.8    | 0.15                 | 94.6               | 5.4     | 0.30                 | 73.0          | 27.0    | 0.81                 |
| <b>Diabetes</b>  |     |                 |         |                      |                    |         |                      |                    |         |                      |               |         |                      |
| No               | 310 | 86.5            | 13.6    |                      | 83.9               | 16.1    |                      | 93.9               | 6.1     |                      | 74.1          | 25.8    |                      |
| Yes              | 247 | 79.8            | 20.2    | <b>0.035</b>         | 92.7               | 7.3     | <b>0.002</b>         | 94.7               | 5.3     | 0.66                 | 72.9          | 27.1    | 0.73                 |
| <b>CRF</b>       |     |                 |         |                      |                    |         |                      |                    |         |                      |               |         |                      |
| No               | 524 | 83.4            | 16.6    |                      | 87.6               | 12.4    |                      | 94.3               | 5.7     |                      | 73.7          | 26.3    |                      |
| Yes              | 34  | 82.4            | 17.7    | 0.87                 | 91.2               | 8.8     | 0.54                 | 94.1               | 5.9     | 0.97                 | 73.5          | 26.5    | 0.99                 |

1  
2  
3  
4  
5  
6  
7  
8  
9  
10  
11  
12  
13  
14  
15  
16  
17  
18  
19  
20  
21  
22  
23  
24  
25  
26  
27  
28  
29  
30  
31  
32  
33  
34  
35  
36  
37  
38  
39  
40  
41  
42  
43  
44  
45  
46  
47  
48  
49

|                |     |      |      |      |      |      |                  |      |     |      |      |      |                  |
|----------------|-----|------|------|------|------|------|------------------|------|-----|------|------|------|------------------|
| <b>HD</b>      |     |      |      |      |      |      |                  |      |     |      |      |      |                  |
| No             | 475 | 84.2 | 15.8 |      | 86.3 | 13.7 |                  | 94.1 | 5.9 |      | 70.5 | 29.5 |                  |
| Yes            | 83  | 78.3 | 21.7 | 0.18 | 96.4 | 3.6  | <b>0.01</b>      | 95.2 | 4.8 | 0.70 | 92.6 | 8.4  | <b>&lt;0.001</b> |
| <b>CLD</b>     |     |      |      |      |      |      |                  |      |     |      |      |      |                  |
| No             | 505 | 82.4 | 17.6 |      | 87.7 | 12.3 |                  | 93.9 | 6.1 |      | 73.5 | 26.5 |                  |
| Yes            | 53  | 92.5 | 7.6  | 0.06 | 88.7 | 11.3 | 0.84             | 98.1 | 1.9 | 0.20 | 75.6 | 24.5 | 0.75             |
| <b>Alcohol</b> |     |      |      |      |      |      |                  |      |     |      |      |      |                  |
| No             | 349 | 82.2 | 17.8 |      | 92.0 | 8.0  |                  | 95.1 | 4.9 |      | 75.1 | 24.9 |                  |
| Yes            | 205 | 84.9 | 15.1 | 0.42 | 80.5 | 19.5 | <b>&lt;0.001</b> | 93.1 | 6.8 | 0.33 | 71.7 | 28.3 | 0.38             |

---

Major BSI pathogens recorded during the 5 years period prior to the final BSI admission. Abbreviations: Alcohol, harmful alcohol consumption; CRF, stage 3 or 4 chronic renal disease; HD, stage 5 renal disease; CLD, chronic liver disease.

Table 3. Infections recorded for Indigenous and non-Indigenous adults during the 5 years prior to the final BSI presentation<sup>a</sup>

|                          | Indigenous<br>n=431 (%) | Non-Indigenous<br>(n=52) | p-value |
|--------------------------|-------------------------|--------------------------|---------|
| Any                      | 296 (68.7)              | 18 (34.6)                | <0.001  |
| BSI                      | 105 (24.4)              | 4 (7.7)                  | 0.007   |
| <i>Respiratory Tract</i> | 179 (41.5)              | 3 (5.8)                  | <0.001  |
| Pneumonia                | 164 (38.1)              | 4 (7.7)                  | <0.001  |
| >3 episodes              | 32 (7.4)                | 0 (0.0)                  | 0.04    |
| Exacerbation BE          | 13 (6.0)                | 0 (0.0)                  | 0.20    |
| <i>Skin/Soft Tissue</i>  | 154 (35.7)              | 7 (13.5)                 | 0.001   |
| <i>Infections</i>        |                         |                          |         |
| Abscess                  | 88 (20.5)               | 0 (0.0)                  | <0.001  |
| Cellulitis               | 47 (10.9)               | 7 (13.7)                 | 0.55    |
| Wound infection          | 42 (9.7)                | 0 (0.0)                  | 0.02    |
| <i>Pyelonephritis</i>    | 77 (17.9)               | 4 (7.7)                  | 0.06    |
| <i>Bone/joint</i>        | 11 (2.6)                | 0 (0.0)                  | 0.24    |
| <i>Enteritis</i>         | 21 (4.9)                | 1 (1.9)                  | 0.33    |
| <i>Scabies</i>           | 14 (3.3)                | 0 (0.0)                  | 0.19    |
| <i>Other</i>             | 6 (1.4)                 | 0 (0.0)                  | 0.39    |

a. Excluding haemodialysis patients (n=83 indigenous, 3 non-indigenous), patients with bronchiectasis (n=27) and those residing outside the Alice Springs urban and rural districts for whom data were not available (Indigenous, 18; non-Indigenous, 0).

Abbreviations: BSI, blood stream infections; BE, bronchiectasis.

Table 4: Multivariate adjusted odds ratios for previous infections among Indigenous patients<sup>a</sup>

|                      | <b>Any infection<br/>(n=470)<sup>b</sup></b> | <b>BSI<br/>(n=553)</b> | <b>Skin<sup>b</sup><br/>(n=470)</b> | <b>Pneumonia<sup>c</sup><br/>(n=443)</b> |
|----------------------|----------------------------------------------|------------------------|-------------------------------------|------------------------------------------|
|                      | <b>Odds ratio</b>                            | <b>Odds ratio</b>      | <b>Odds ratio</b>                   | <b>Odds ratio</b>                        |
|                      | <b>(95% CI)</b>                              | <b>(95% CI)</b>        | <b>(95% CI)</b>                     | <b>(95% CI)</b>                          |
| <b>Residence</b>     |                                              |                        |                                     |                                          |
| Urban                | 1.00                                         | 1.00                   | 1.00                                | 1.00                                     |
| Town camp            | 1.2 (0.6-2.4)                                | 1.8 (0.9-3.4)          | 1.3 (0.7-2.5)                       | 1.3 (0.7-2.6)                            |
| Remote               | 0.8 (0.5-1.4)                                | 1.3 (0.7-2.3)          | 1.2 (0.7-2.2)                       | 0.8 (0.4-1.4)                            |
| Age (10 yrs)         | 0.9 (0.8-1.0)                                | 1.1 (0.9-1.2)          | 0.9 (0.8-1.0)                       | 1.0 (0.9-1.2)                            |
| Gender (0=F,<br>1=M) | 1.0 (0.7-1.5)                                | 1.3 (0.9-1.9)          | 1.0 (0.7-1.6)                       | 1.0 (0.7-1.6)                            |
| Diabetes             | 1.4 (0.9-2.2)                                | 1.1 (0.7-1.7)          | <b>2.1 (1.4-3.3)</b>                | 1.1 (0.7-1.7)                            |
| CRF                  | <b>3.0 (1.1-8.2)</b>                         | 1.7 (0.8-3.8)          | 1.5 (0.7-3.2)                       | 1.6 (0.7-3.7)                            |
| Alcohol              | <b>2.8 (1.8-4.4)</b>                         | <b>1.7 (1.1-2.5)</b>   | <b>1.7 (1.1-2.6)</b>                | <b>4.3 (2.8-6.7)</b>                     |



1  
2  
3 a. Previous infections during 5 years prior to the final BSI in the study period. Adjusted  
4  
5 for other risk factors in table.  
6

7  
8 b. Excluding patients receiving haemodialysis.  
9

10 c. Excluding patients receiving haemodialysis and those with bronchiectasis  
11

12 Abbreviations: BSI, blood stream infections; CRF, chronic renal failure excluding  
13 patients receiving haemodialysis.  
14  
15  
16  
17  
18  
19  
20  
21  
22  
23  
24  
25  
26  
27  
28  
29  
30  
31  
32  
33  
34  
35  
36  
37  
38  
39  
40  
41  
42  
43  
44  
45  
46  
47  
48  
49  
50  
51  
52  
53  
54  
55  
56  
57  
58  
59  
60

Table 5: Multivariate analysis of factors associated with 28 day and long-term survival for 510 Indigenous patients following a Community-acquired Blood Stream Infection<sup>a</sup>.

|                   |           | Deaths    |       | 28 day survival      |              | Long-term survival   |                  |
|-------------------|-----------|-----------|-------|----------------------|--------------|----------------------|------------------|
|                   | n         | (28 days) | (all) | HR (95% CI)          | p-value      | HR (95% CI)          | p-value          |
| Residence         |           |           |       |                      |              |                      |                  |
| Urban             | 63        | 7         | 20    | 1.00                 |              | 1.0                  |                  |
| Town Camp         | 125       | 20        | 37    | 1.7 (0.7-4.1)        |              | 1.2 (0.7-2.2)        |                  |
| Remote            | 302       | 22        | 67    | 0.9 (0.4-2.0)        | 0.12         | 0.9 (0.5-1.5)        | 0.28             |
| Age (10yrs)       |           |           |       | 1.04 (0.8-1.3)       | 0.70         | 1.0 (0.9-1.1)        | 0.99             |
| Gender (0=F,1=M)  | 298F/212M | 23/26     | 65/59 | 1.5 (0.8-2.7)        | 0.17         | 1.3 (0.9-2.0)        | 0.13             |
| CLD (0=No, 1=Yes) | 41        | 11        | 20    | <b>3.3 (1.6-6.7)</b> | <b>0.001</b> | <b>2.5 (1.5-4.2)</b> | <b>&lt;0.001</b> |
| Non-RHD           | 37        | 9         | 16    | <b>2.9 (1.4-6.2)</b> | <b>0.005</b> | <b>2.1 (1.2-3.6)</b> | <b>0.01</b>      |
| CRF               | 28        | 6         | 11    | <b>2.6 (1.0-6.5)</b> | <b>0.04</b>  | <b>2.3 (1.2-4.3)</b> | <b>0.01</b>      |

|                       |     |    |    |                        |                  |                       |                  |
|-----------------------|-----|----|----|------------------------|------------------|-----------------------|------------------|
| Malignancy            | 11  | 3  | 10 | 2.9 (0.9-9.9)          | 0.09             | <b>6.0 (3.0-12.4)</b> | <b>&lt;0.001</b> |
| Organism <sup>b</sup> |     |    |    |                        |                  |                       |                  |
| <i>E.coli</i>         | 143 | 5  | 22 | 1.0                    |                  | 1.0                   |                  |
| <i>S.aureus</i>       | 83  | 7  | 18 | <b>2.7 (1.0-7.3)</b>   | <b>0.05</b>      | <b>1.8 (1.1-3.0)</b>  | <b>0.03</b>      |
| <i>K.pneumoniae</i>   | 29  | 12 | 15 | 2.3 (0.7-7.5)          | 0.17             | 1.4 (0.7-2.7)         | 0.17             |
| <i>S.pneumoniae</i>   | 67  | 5  | 17 | <b>13.4 (4.6-39.2)</b> | <b>&lt;0.001</b> | <b>4.8 (2.5-9.5)</b>  | <b>&lt;0.001</b> |
| <i>Other</i>          | 188 | 20 | 52 | 1.8 (0.5-6.3)          | 0.37             | 1.5 (0.8-3.0)         | 0.22             |

a. Excluded from analysis: 48 Nosocomial infections.

b. Pathogens isolated from blood cultures

Abbreviations: BSI, blood stream infection; CCF; CLD, chronic liver disease; CRF, chronic renal failure; Non-RHD, ischaemic heart disease and cardiac failure.

1  
2  
3  
4  
5  
6  
7  
8  
9  
10  
11  
12  
13  
14  
15  
16  
17  
18  
19  
20  
21  
22  
23  
24  
25  
26  
27  
28  
29  
30  
31  
32  
33  
34  
35  
36  
37  
38  
39  
40  
41  
42  
43  
44  
45  
46  
47  
48  
49  
50  
51  
52  
53  
54  
55  
56  
57  
58  
59  
60  
  
1 **References**

- 2 1. Omran A. A theory of the epidemiology of population change. *Milbank Mem*  
3 *Fund Q.* 1971;49:509-538.
- 4 2. Maher D, Smeeth, L., Sekajugo, J. Health transition in Africa: practical policy  
5 proposals for primary care. *Bull WHO.* 2010;88:943-948.
- 6 3. Gracey M, King, M. Indigenous Health part 1: determinants and disease patterns.  
7 *Lancet.* 2009;374:65-75.
- 8 4. Frenk J, Bobadilla, JL., Sepulveda J., et al. Health transition in middle-income  
9 countries: new challenges for health care. *Health Policy and Planning.*  
10 1989;4(1):29-39.
- 11 5. Heuveline P, Guillot, M., Gwatkin, DR. The uneven tide of the health transition.  
12 *Soc Sci Med.* 2002;55:313-322.
- 13 6. United Nations. *State of the World's Indigenous Peoples.* New York: The United  
14 Nations Department of Economic and Social Affairs; 2009.
- 15 7. Australian Bureau of Statistics. *The health and welfare of Australia's Aboriginal*  
16 *and Torres Strait Islander peoples.* Canberra; 2005.
- 17 8. Zhao Y, Dempsey, K. Causes of inequality in life expectancy between indigenous  
18 and non-indigenous people in the Northern Territory, 1981-2000: a decomposition  
19 study. *Med J Aust.* 2006;184:490-494.
- 20 9. Australian Bureau of Statistics. *The Health and Welfare of Australia's Aboriginal*  
21 *and Torres Strait Islander Peoples.* Canberra: Australia; 2010.  
22 [www.censusdata.abs.gov.au/census\\_services/getproduct/census/2011/community](http://www.censusdata.abs.gov.au/census_services/getproduct/census/2011/community)  
23 [profile/IARE701002?opendocument&navpos=230](http://www.censusdata.abs.gov.au/census_services/getproduct/census/2011/community)
- 24 10. Davis J, Cheng, AC., McMillan, M., et al. Sepsis in the tropical Top End of  
25 Australia's Northern Territory: disease burden and impact on Indigenous  
26 Australians. *Med J Aust.* 2011;194:519-524.
- 27 11. Einsiedel L, Woodman, RJ. Two Nations: racial disparities in bloodstream  
28 infections recorded at Alice Springs Hospital, central Australia, 2001-2005. *Med J*  
29 *Aust.* 2010;192:567-571.
- 30 12. O'Grady K, Taylor-Thompson, D., Chang, A., et al. Rates of radiologically  
31 confirmed pneumonia as defined by the World Health Organisation in Norther  
32 Territory Indigenous children. *Med J Aust.* 2010;192(10):592-595.
- 33 13. Einsiedel L, Fernandes, L., Spelman, T., et al. Bronchiectasis is associated with  
34 Human T Lymphotropic Virus 1 infection in an Indigenous Australian population.  
35 *Clin Infect Dis.* 2012;54(1):43-50.
- 36 14. Einsiedel L, Fernandes, L., Woodman, R. . Racial disparities in infection-related  
37 mortality at Alice Springs Hospital, central Australia, 2000-2005. *Med J Aust.*  
38 2008;188:568-571.
- 39 15. Kway M, Rose, CE., Fry, AM., et al. The influence of chronic illness on the  
40 incidence of invasive pneumococcal disease in adults. *Clin Infect Dis.*  
41 2005;192:377-386.
- 42 16. Joshi N, Caputo, GM., Weitekamp, MR., et al. Infections in diabetic patients. *N.*  
43 *Engl. J. Med.* 1999;341(25):1906-1912.

- 1 17. Baker M, Barnard, LT., Kvalsvig, A., et al. Increasing incidence of serious  
2 infectious diseases and inequalities in New Zealand: a national epidemiological  
3 study. *Lancet*. 2012;379:1112-1119.
- 4 18. Einsiedel L, van Iersel, E., Macnamara, R., et al. Self-Discharge by adult  
5 Aboriginal patients at Alice Springs Hospital, central Australia: insights from a  
6 prospective cohort study. *Aust Health Rev*. 2012.
- 7 19. Australian Bureau of Statistics. *2011 Census of population and Housing.*  
8 *Aboriginal and Torres Strait Islander (Indigenous) Profile*. Canberra; 2013.  
9 2002.0.  
10 www.abs.gov.au/AUSSTATS/abs@.nsf/lookup/4704.0Chapter218Oct+2010
- 11 20. Skov S, Chikrizhs, TN., Li SQ., et al. How much is too much? Alcohol  
12 consumption and related harm in the Northern Territory. *Med J Aust*.  
13 1010;193:269-272.
- 14 21. Bailie R, Runcie, MJ. Household infrastructure in Aboriginal communities and  
15 the implications fro health improvement. *Med J Aust*. 2001;175:363-366.
- 16 22. Anaya J. *Report of the Special Rapporteur on the situation of human rights and*  
17 *fundamental freedoms of indigenous peoples, James Anaya, on the situation of*  
18 *indigenous people in Australia*. United Nations; 2010.
- 19 23. d'Espaignet E, Kennedy, K., Paterson, B., et al. *Health Status in the Northern*  
20 *Territory 1998*. Darwin: Epidemiology, Primary Care and Coordinated Care  
21 Branch;1998.
- 22 24. McDonald E, Bailie, R., Grace, J., et al. An ecological approach to health  
23 promotion in remote Australian Aboriginal communities. *Health Promotion*  
24 *International*. 2010;25(1):42-53.
- 25 25. O'Brien J, Lu, B., Ali, NA., Martin, GS., et al. Alcohol dependence is  
26 independently associated with sepsis, septic shock and hospital mortality among  
27 adult intensive care unit patients. *Crit. Care Med*. 2007;35(2):345-350.
- 28 26. Laupland K, Gregson, DB., Zygun, DA., Doig, CJ., et al. Severe blood stream  
29 infections: a population-based assessment. *Crit Care Med*. 2004;32:992-997.
- 30 27. Nuori J, Butler, JC., Farley, MM., Harrison, LH., et al. Cigarette smoking and  
31 invasive pneumococcal disease. *N Engl J Med*. 2000;342:681-689.
- 32 28. Dopirak M, Hill, C., Oleksiw, M., Dumigan, D., et al. Surveillance of  
33 hemodialysis-associated primary bloodstream infections: the experience of ten  
34 hospital-based centers. *Infect Control Hosp Epidemiol*. 2002;23:721-724.
- 35 29. Zhao Y, Connors, C., Wright, J., et al. Estimating chronic disease prevalence  
36 among the remote Aboriginal population of the Northern Territory using multiple  
37 data sources. *Aust NZ J Public Health*. 2008;32:307-313.
- 38 30. Hoy W, Davey, RL., Sharma, S., Hoy, PW., et al. Chronic disease profiles in  
39 remote Aboriginal settings and implications for health services planning. *Aust NZ*  
40 *J Public Health*. 2010;34:11-18.
- 41 31. Moberley S, Krause, V., Cook, H., Mulholland, K., et al. Failure to vaccinate of  
42 failure of vaccine? Effectiveness of the 23-valent pneumococcal polysaccharide  
43 vaccine program in Indigenous adults in the Northern Territory of Australia.  
44 *Vaccine*. 2010;28:2296-2301.

- 1  
2  
3  
4  
5  
6  
7  
8  
9  
10  
11  
12  
13  
14  
15  
16  
17  
18  
19  
20  
21  
22  
23  
24  
25  
26  
27  
28  
29  
30  
31  
32  
33  
34  
35  
36  
37  
38  
39  
40  
41  
42  
43  
44  
45  
46  
47  
48  
49  
50  
51  
52  
53  
54  
55  
56  
57  
58  
59  
60
- 1 32. Flory J, Joffe, M., Fishman, NO., Edelstein, PH., et al. Socioeconomic risk factors  
2 for bacteraemic pneumococcal pneumonia in adults. *Epidemiol Infect.*  
3 2009;137:717-726.
- 4 33. Tong S, Bishop, E., Lilliebridge, R., Cheng, A., et al. Community Associated  
5 strains of Methicillin-Resistant Staphylococcus aureus and Methicillin-  
6 Susceptible S.aureus in Indigenous Northern Australia: Epidemiology and  
7 Outcomes. *J Infect Dis.* 2009;199:1461-1470.
- 8 34. Huggan P, Wells, JE., Browne, M., Richardson, A., et al. Population-based  
9 epidemiology of Staphylococcus aureus bloodstream infection in Canterbury,  
10 New Zealand. *Int Med J.* 2010;40:117-125.
- 11 35. Bagger J, Zindrou, D., Taylor, KM. Post-operative infection with Methicillin-  
12 resistant Staphylococcus aureus and socioeconomic background. *Lancet.*  
13 2004;363:706-708.
- 14 36. Marmot M, Friel, S., Bell, R., Houweling, T., et al. Closing the gap in a  
15 generation: health equity through action on the social determinants of health.  
16 *Lancet.* 2008;372(November 8):1661-1669.
- 17 37. Beaglehole R, Bonita, R., Horton, R., Adams, C., et al for the Lancet NCD action  
18 group and the NCD alliance. Priority actions for the non-communicable disease  
19 crisis. *Lancet.* 2011;377:1438-1447.
- 20 38. Bailie R, Stevens, MR., McDonald, E., Halpin, S., et al. Skin infection, housing  
21 and social circumstances in children living in remote Indigenous communities:  
22 testing conceptual and methodological approaches. *BMC public health.* 2005;5.
- 23 39. McDonald M, Towers, RJ., Andrews, RM., Bengler, N., et al. Low rates of  
24 streptococcal pharyngitis and high rates of pyoderma in Australian Aboriginal  
25 communities where acute rheumatic fever is hyperendemic. *Clin Infect Dis.*  
26 2006;43:683-689.
- 27 40. Currie B, Carapetis, JR. Skin infections and infestations in Aboriginal  
28 communities in northern Australia. *Aust J Dermatol.* 2000;41:139-145.
- 29 41. Hewagama S, Spelman, T., Einsiedel, L. Staphylococcus aureus bacteraemia at  
30 Alice Springs Hospital, central Australia, 2003-2006. *Int Med J.* 2012;42:505-  
31 512.
- 32 42. Carapetis J, Wolff, DR., Currie, BJ. Acute rheumatic fever and rheumatic heart  
33 disease in the Top End of Australia's Northern Territory. *Med J Aust.* 1996;164(5  
34 February):146-149.
- 35 43. Jacoby P, Carvillo, K., Hall, S., Riley, T., et al. Crowding and other strong  
36 predictors of upper respiratory carriage of otitis media related bacteria in  
37 Australian Aboriginal and non-Aboriginal children. *Paed Inf Dis J.*  
38 2011;30(6):480-485.
- 39 44. Verdonck K, Gonzalez, E., Van Dooren, S., Vandamme, A., et al. Human T-  
40 lymphotropic virus 1: recent knowledge about an ancient infection. *Lancet Infect*  
41 *Dis.* 2007;7:266-281.
- 42 45. Priest N, Paradies, Y., Stevens, M., Bailie, R. Exploring relationships between  
43 racism, housing and child illness in remote indigenous communities. *J Epidemiol*  
44 *Community Health* 2012;66:440-447.
- 45 46. Boutayeb A, Boutayeb, B. The burden of non-communicable diseases in  
46 developing countries. *int J Equity in Health.* 2005;4(1):2.

- 1  
2  
3  
4  
5  
6  
7  
8  
9  
10  
11  
12  
13  
14  
15  
16  
17  
18  
19  
20  
21  
22  
23  
24  
25  
26  
27  
28  
29  
30  
31  
32  
33  
34  
35  
36  
37  
38  
39  
40  
41  
42  
43  
44  
45  
46  
47  
48  
49  
50  
51  
52  
53  
54  
55  
56  
57  
58  
59  
60
- 1 47. De Maeseneer J, Roberts RG, Demarzo M, et al. Tackling NCDs: a different  
2 approach is needed. *The Lancet*. 2012;379(9829):1860-1861.  
3  
4

1  
2  
3  
4  
5  
6  
7  
8  
9  
10  
11  
12  
13  
14  
15  
16  
17  
18  
19  
20  
21  
22  
23  
24  
25  
26  
27  
28  
29  
30  
31  
32  
33  
34  
35  
36  
37  
38  
39  
40  
41  
42  
43  
44  
45  
46  
47  
48  
49  
50  
51  
52  
53  
54  
55  
56  
57  
58  
59  
60

2 | ~~The a~~ Association of non-communicable diseases, ~~with blood stream~~  
3 | infection ~~incidence~~ and survival in a retrospective cohort of ~~I~~indigenous and  
4 | non-Indigenous ~~adults in central Australia in central Australians~~.

6 | Lloyd Einsiedel<sup>1</sup>, Liselle Fernandes<sup>1</sup>, Sheela Joseph<sup>1</sup>, Alex Brown<sup>2</sup> and

7 | Richard J Woodman<sup>1</sup>

10 | (1) Flinders University/Northern Territory Rural Clinical School, Alice Springs Hospital, 0870,  
11 | Northern Territory, Australia

12 | (2) Head, Centre for Indigenous Vascular Research, Baker IDI Heart and Diabetes  
13 | Institute, Alice Springs Hospital, 0870, Northern Territory, Australia.

15 | § Corresponding author:

16 | Lloyd Einsiedel. Alice Springs Hospital, Department of Medicine, Darwin, Northern  
17 | Territory, Australia. Tel: + 61 08 89519607, Fax: + 61 08 89538385, E-mail:  
18 | [lloyd.einsiedel@health.sa.gov.au](mailto:lloyd.einsiedel@health.sa.gov.au)

20 | Running title: Infection risk in Indigenous Australians

21 | Keywords: ~~—Epidemiologic transition~~Non-communicable diseases, [diabetes](#), [alcohol](#),

22 | [i](#)nfection, Indigenous [h](#)Health, Australia



2

2 Word count:

3 Abstract: 293

4 Text: ~~3758491~~

5 References: ~~470~~

6 Conflict-of-interest : None reported

7 Funding statement:

8 This study received funding from the Northern Territory Rural Clinical School, which is  
9 an initiative of the Australian Department of Health and Ageing.

## 2 Abstract

3 Objectives: We hypothesize that rising prevalence rates of non-communicable diseases  
4 (NCDs) increases infection risk and worsens outcomes among socially disadvantaged  
5 Indigenous Australians undergoing a rapid epidemiological transition.

6 Design: Pathology, imaging and discharge morbidity codes were retrospectively reviewed  
7 for a period of 5 years prior to admission with a blood stream infection (BSI), 1st January  
8 2003 to 30th June 2007.

9 Participants: 558 Indigenous and 55 non-Indigenous community residents of central  
10 Australia.

11 Outcome measures: The effects of NCDs on risk of infection and death were determined  
12 after stratifying by ethnicity.

13 Results: Mean annual BSI incidence rates were far higher among Indigenous residents  
14 (Indigenous, 93770 per 100,000; non-Indigenous, 6448 per 100,000 person-years;  
15 IRR=14.620.33; 95% CI=14.6120.31-14.6520.35,  $p<0.001$ ). Indigenous patients were  
16 also more likely to have previous bacterial infections (68.7% versus 34.6%; respectively,  
17  $p<0.001$ ), diabetes (44.3% versus 20.0%;  $p<0.001$ ), harmful alcohol consumption (37.0%  
18 versus 12.7%;  $p<0.001$ ) and other communicable diseases (HTLV-1, 45.2%;  
19 strongyloidiasis, 36.1%; HBV, 12.9%). Among Indigenous patients, diabetes increased  
20 odds of current *Staphylococcus aureus* BSI (OR=1.6, 95% CI=1.0-2.5) and prior skin  
21 infections (adjusted OR=2.1, 95% CI=1.4-3.3). Harmful alcohol consumption increased  
22 odds of current *Streptococcus pneumoniae* BSI (OR=1.57, 95% CI=1.02-2.40) and of  
23 previous BSI (OR=1.7, 95% CI=1.1-2.5), skin infection (OR=1.7, 95% CI=1.1-2.6) or  
24 pneumonia (OR=4.3, 95% CI=2.8-6.7). Twenty-six percent of Indigenous patients died

1  
2  
3  
4  
5  
6  
7  
8 at a mean (SD) age of 47±15 years. Complications of diabetes and harmful alcohol  
9  
10 consumption predicted 28-day mortality (non-rheumatic heart disease, HR=2.9; 95%  
11  
12 CI=1.4-6.2; chronic renal failure, HR=2.6, 95%CI=1.0-6.5; chronic liver disease,  
13  
14 HR=3.3, 95%\_CI=1.6-6.7).  
15  
16 Conclusion: In a socially disadvantaged population undergoing a rapid epidemiologic  
17  
18 transition, NCDs are associated with an further-increased risk of infection-risk of  
19  
20 infection and BSI related mortality. Complex interactions between communicable  
21  
22 diseases and NCDs demand an integrated approach to management, which must include  
23  
24 the empowerment of affected populations to promote behavioural change.  
25  
26  
27  
28  
29  
30  
31  
32  
33  
34  
35  
36  
37  
38  
39  
40  
41  
42  
43  
44  
45  
46  
47  
48  
49  
50  
51  
52  
53  
54  
55  
56  
57  
58  
59  
60

## Article Summary

### Article Focus

- Remote dwelling, Indigenous Australians are undergoing a rapid epidemiological transition, which is accompanied by a ~~rapidly~~ rising burden of non-communicable diseases (NCDs).
- In this setting of social disadvantage and frequent pathogen exposure, NCDs may increase risk of infection and infection-related death.

### Key Messages

- We reveal substantial racial disparities in rates of infection and of NCDs, reflecting the dual burden of disease that affects this Indigenous population.
- NCDs were associated with an increased risk of blood stream infections with some pathogens, previous infections that provide portals of entry for life-threatening invasive disease and infection-related mortality.
- Complex interactions between communicable diseases and NCDs demand an integrated approach to management, which must include the empowerment of affected populations to promote behavioural change.

### Strengths and limitations of this study

- This hospital-based study only includes patients who were admitted with a blood stream infection. We are therefore unable to determine the actual risk of blood stream infections that is attributable to NCDs or to comment on background rates of other infections ~~that, which~~ might be treated in the community.
- The major strength of our study lies in the demography of the study population, which is served by a single hospital, and the extensive nature of the clinical

1  
2  
3  
4  
5  
6  
7  
8  
9  
10  
11  
12  
13  
14  
15  
16  
17  
18  
19  
20  
21  
22  
23  
24  
25  
26  
27  
28  
29  
30  
31  
32  
33  
34  
35  
36  
37  
38  
39  
40  
41  
42  
43  
44  
45  
46  
47  
48  
49  
50  
51  
52  
53  
54  
55  
56  
57  
58  
59  
60

6

2 material on which our analysis is based.

3

For peer review only

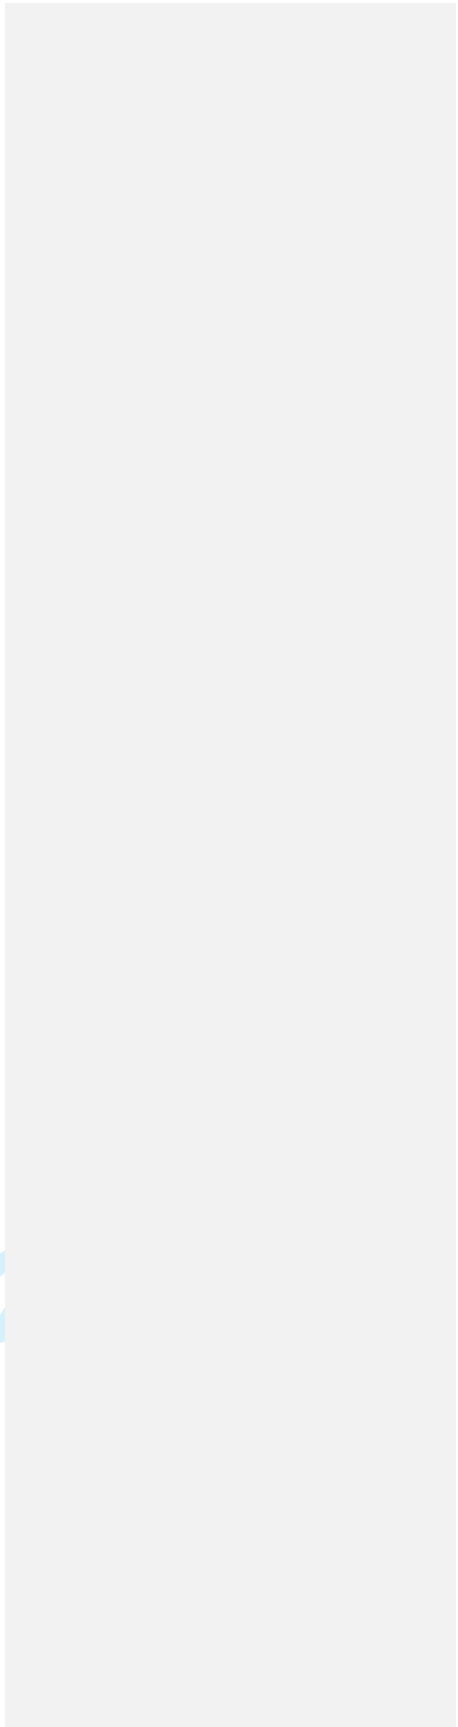

## 2 Introduction

3 Complex interactions between the demographic, economic and sociologic determinants  
4 of disease result in changing patterns of health and disease over time<sup>1</sup>. The development  
5 of modern social and economic structures, for example, has been ~~is~~ associated with a  
6 reduction in infectious diseases and nutritional deficiencies and a corresponding rise in  
7 non-communicable diseases (NCDs) that are associated with ~~due to~~ ageing and ~~lifestyle~~  
8 factors<sup>1</sup>. In many developing countries ~~The~~ rapidity of this ~~phenomenon has been~~  
9 termed the 'epidemiologic transition' (Omran) ~~has resulted in a~~ -In developing countries,  
10 rapid demographic change has dramatic ~~been associated with marked increases in~~ NCD  
11 the pPrevalence rates ~~of of~~ non-communicable diseases (NCDs), such as diabetes,  
12 among ~~in~~ populations that have with a substantial pre-existing infectious disease ~~are rising~~  
13 rapidly in developing countries, adding to a pre-existing burden of infectious diseases in  
14 populations that are undergoing rapid demographic changes<sup>2,3</sup>. This phenomenon  
15 proceeds at different rates according to the socioeconomic status of particular sub-groups  
16 within a given population and may reinforce established health inequalities<sup>4,5</sup>.

17  
18 Among Indigenous people, forced displacement, the collapse of Indigenous economies  
19 and the destruction of socio-political structures have been the shared experience of  
20 colonization<sup>6</sup>. Indigenous people living within developed countries continue to live in  
21 poverty and experience a 'protracted' epidemiologic transition<sup>4</sup> that is associated with a  
22 double burden of communicable and non-communicable diseases<sup>7,8</sup> similar to that of  
23 many developing countries<sup>2</sup>. A similar double burden of communicable and non-  
24 communicable diseases and NCDs affects marginalized Indigenous people living in

~~poverty within developed countries<sup>3,4</sup>. In central Australia. Among Indigenous Australians,~~ for example, ~~diabetes and other NCDs~~ NCDs are the major contributors to racial disparities in mortality<sup>8</sup> and to a life expectancy that remains ~~147~~ years less ~~for Indigenous Australian men relative to than that of~~ their non-Indigenous peers<sup>9</sup>. ~~A In central Australia, rising prevalence rates of NCDs affect an Indigenous population in which a~~ high burden of infectious diseases persists ~~in this Indigenous population.~~ Incidence rates of sepsis<sup>10</sup>, blood stream infections<sup>11</sup> and childhood pneumonia<sup>12</sup> ~~(ref)~~, and prevalence rates of bronchiectasis<sup>13</sup> are the highest reported worldwide. Strongyloidiasis and chronic viral infections, such as with hepatitis B virus (HBV) and the Human T-Lymphotropic Virus 1 (HTLV-1), are also common<sup>11</sup>. Population-based infection-related mortality rates for Indigenous adults in central Australia therefore remain higher than those of some African countries prior to the current HIV pandemic and the median age of in-hospital death is only 48 years<sup>14</sup>.

Interactions between communicable diseases and NCDs have been little studied; however, an appreciable effect of NCDs on infection rates is likely where pathogen exposure is frequent. Diabetes, for example, contributes to the risk of serious bacterial infections including *Streptococcus pneumoniae*<sup>15</sup> and *Staphylococcus aureus*<sup>16</sup>, which are common pathogens in overcrowded Indigenous Australian communities<sup>11</sup>. The NCD burden may therefore have a substantial impact on infection rates and outcomes where these two epidemics coincide. Such an interaction could reverse health gains in populations undergoing a rapid epidemiologic transition and exacerbate health inequalities among disadvantaged subgroups within developed countries. The recent

1  
2  
3  
4  
5  
6  
7  
8  
9 2 description in New Zealand of an increasing divergence in infection-related  
10 3 hospitalization rates according to social status is consistent with this possibility and  
11 4 challenges health transition theory<sup>17</sup>.

12  
13  
14  
15  
16 6 Central Australia is well placed to study interactions between poverty, NCDs and  
17 7 infectious diseases. Most Indigenous residents live in remote communities in conditions  
18 8 of considerable socio-economic disadvantage, leaving a minority within the major  
19 9 regional township of Alice Springs. The latter have ready access to a well-resourced  
20 10 medical facility, Alice Springs Hospital (ASH), which has sophisticated diagnostic  
21 11 capabilities and provides specialist medical care to a region of 1,000,000 km<sup>2</sup>. Indigenous  
22 12 residents of Alice Springs dwell in either overcrowded 'town camps', which have poor  
23 13 amenities and limited refuse disposal, or are integrated with the majority of the non-  
24 14 Indigenous population within the township's suburbs. Indigenous adults living in town  
25 15 camps and remote communities are often unemployed, have limited education (ABS) and  
26 16 poor health literacy<sup>18</sup> (ref). ~~A~~For example, among Indigenous adult residents of town  
27 17 camps, nearly half 60% have less than 8 years or less of schooling, labour participation  
28 18 rates are less than 20% and only 12% are employed<sup>19</sup> (ABS 2013). ~~Despite an extremely  
29 19 complex regulatory framework and numerous a variety of Government  
30 20 attempts interventions to minimize risk, harmful alcohol consumption in this setting  
31 21 remains common<sup>20</sup> (ref).~~

32  
33  
34  
35  
36  
37  
38  
39  
40  
41  
42  
43  
44  
45  
46  
47  
48  
49 23 The Indigenous population of central Australia~~this region~~ also has among the highest  
50 24 blood stream infection incidence rates reported<sup>11</sup>. Living conditions that increase the risk  
51  
52  
53  
54  
55  
56  
57  
58  
59  
60



10

1  
2  
3  
4  
5  
6  
7  
8 of pathogen exposure <sup>21</sup>(ref) and high background rates of focal infections, which provide  
9 portals of entry for bacterial invasion, are likely to precede these life-threatening  
10 infections. Blood stream infection incidence rates therefore provide measurable end-  
11 points to which environmental and host factors contribute.  
12  
13  
14  
15  
16  
17

18 Here we report the infectious and non-communicable disease burden among community  
19 residents of central Australia who presented with a blood stream infection and determine  
20 risk factors for infection and death after stratifying by ethnicity.  
21  
22  
23  
24  
25  
26  
27  
28  
29  
30  
31  
32  
33  
34  
35  
36  
37  
38  
39  
40  
41  
42  
43  
44  
45  
46  
47  
48  
49  
50  
51  
52  
53  
54  
55  
56  
57  
58  
59  
60

## 2 **Methods**

3 We conducted a retrospective review of all positive blood cultures collected from adult  
4 patients (age $\geq$ 15 years) admitted to ASH between 1<sup>st</sup> January 2001 and 31<sup>st</sup> June 2007. In  
5 July 2007 the Australian Federal Government suspended racial discrimination legislation  
6 and implemented an 'Emergency Response' that resulted in considerable uncertainty  
7 among Indigenous residents<sup>22</sup>. This raised concerns that the central Australian resident  
8 population could change as people moved interstate to escape these restrictions and no  
9 data was collected after this date. Data collected included organism, ethnicity, dates of  
10 birth, dates of death, indigenous status and place of residence. For patients who presented  
11 between 1<sup>st</sup> January 2003 and 31<sup>st</sup> June 2007 we also obtained ICD 10 morbidity codes  
12 and the results of microbiological and radiological investigations for each admission for 5  
13 years prior to the final BSI presentation. NCDs were derived from ICD-10 morbidity  
14 codes for diabetes, harmful alcohol consumption, >stage 2 chronic kidney disease,  
15 ischaemic heart disease, chronic liver disease and malignancy. Bronchiectasis was  
16 diagnosed radiologically using American College of Chest Physician criteria. Heart  
17 failure and valvular heart disease, including rheumatic heart disease (RHD), were  
18 diagnosed by trans-thoracic echocardiography. Ischaemic heart disease and cardiac  
19 failure were combined ('non-rheumatic heart disease') for statistical analysis.

## 21 *Definitions*

### 22 Residence

23 Place of residence was categorized as i) remote (>100 km from Alice Springs), ii) Alice  
24 Springs town camp and iii) urban (resident in Alice Springs, but not in a town camp).

1  
2  
3  
4  
5  
6  
7  
8  
9 2 Nursing home residents were included in calculations of BSI incidence rates, but  
10 3 excluded from further analysis because the primary study objective was to determine risk  
11 4 factors for infection and death among community residents.  
12  
13

#### 14 5 15 6 Infections

17 7 A blood culture from which a pathogen was isolated was defined as a 'BSI episode'.  
18 8 Repeated culture of the same organism from blood culture was regarded as a separate  
19 9 'episode' only if blood samples were drawn more than one month apart. Blood stream  
20 10 infections were defined as community-acquired if a pathogen was isolated from blood  
21 11 cultures drawn within 48 hours of admission and nosocomial if isolated from blood  
22 12 cultures drawn after this time. Foci of infection were determined where possible from  
23 13 ICD-10 morbidity codes in association with pathology and imaging results for each  
24 14 admission for five years prior to the final BSI during the study period. A diagnosis of  
25 15 pneumonia was made if there was radiological evidence of consolidation and this was  
26 16 attributed to the pathogen isolated from blood cultures if the same organism was also  
27 17 isolated from sputum or the blood culture isolate was an organism typically associated  
28 18 with pneumonia, such as *Streptococcus pneumoniae*. Blood stream infections excluded  
29 19 infections with potential contaminants including coagulase negative staphylococci,  
30 20 bacillus spp., coryneforms and viridans streptococci unless grown from more than one  
31 21 BC in a 24 hour period, as were *Acinetobacter sp* in the absence of an identifiable focus.  
32  
33  
34  
35  
36  
37  
38  
39  
40  
41  
42  
43  
44  
45  
46  
47  
48  
49  
50  
51  
52  
53  
54  
55  
56  
57  
58  
59  
60

The study was approved by the Central Australian Human Research Ethics Committee-  
[www.health.nt.gov.au/Agency/Advisory\\_Groups\\_and\\_Taskforces/Human\\_Research\\_Ethics\\_Committee/index.aspx](http://www.health.nt.gov.au/Agency/Advisory_Groups_and_Taskforces/Human_Research_Ethics_Committee/index.aspx).

#### *Statistics.*

All associations were assessed using data obtained for the final BSI admission within the study period. Univariate analysis for categorical data was performed using Chi-squared statistics and Fishers Exact where appropriate. Multivariate analysis was performed using binary logistic regression. Short (28-day) and long term survival analysis following the final BSI episode in the study period was performed using the log-rank statistic for univariate analysis and Cox regression for multivariate analysis. We calculated the annual population-based incidence rates for 2001-2006 for the combined Alice Springs and Anangu Pitjantjatjara Yankunytjara (APY) land areas using the total number of BSI presentations each year as the numerator. The denominator used was the estimated Adult resident population obtained from Australian Bureau of Statistics 2006 census data for the Alice Springs region combined with that of the neighbouring APY land areas. To enable analysis according to place of residence this population was further divided into that of i) the Alice Springs urban area excluding town camps (Indigenous 2898, non-Indigenous 18471), ii) Alice Springs town camps, including that of a closely affiliated neighbouring community (Indigenous, 1482), and iii) the Alice Springs rural area (Indigenous, 8925; non-Indigenous, 2775), which included that for the APY land areas (Indigenous= 1302, non-Indigenous=294).

2

## 3 **Results**

### 4 *Patient demographics*

5 558 Indigenous and 55 non-indigenous adult community residents presented to ASH with  
6 a BSI between January 2003 and July 2007. Detailed demographic, clinical and  
7 microbiological data are described in Table 1. Indigenous patients were younger  
8 (Indigenous, 44.7±15.2; non-Indigenous, 57.5±21.1; p<0.001), more likely to be female  
9 (Indigenous, 58.1%; non-Indigenous, 41.8%; p<0.03) and to live in a town camp or  
10 remote community (Indigenous, 84.0%; non-Indigenous, 0; p<0.001). Non-  
11 communicable diseases including diabetes (Indigenous, 44.3%; non-Indigenous, 20.0%;  
12 p<0.001) and harmful alcohol consumption (Indigenous, 37.0%; non-Indigenous, 12.7%;  
13 p<0.001) were more common among Indigenous patients, while non-Indigenous patients  
14 were more likely to have ischaemic heart disease (Indigenous, 3.4%; non-Indigenous,  
15 31.6%; p<0.001), malignancy (Indigenous, 2.3%; non-Indigenous, 20.0%; p<0.001), to  
16 be receiving palliative care (Indigenous, 1.8%; non-Indigenous, 9.1%; p=0.001) and to  
17 have a history of intravenous drug use (Indigenous, 0; non-Indigenous, 5.5%; p=0.001).  
18 Forty-seven (8.4%) Indigenous and 5 (9.3%) non-indigenous BSI episodes were  
19 nosocomial (Table 1).

20

### 21 *Population-based incidence rates 2001-2006*

22 ~~The overall population based BSI incidence rate for the Alice Springs area between 2001~~  
23 ~~and 2006 was more than 20 times higher for Indigenous adults (970 per 100,000 person-~~  
24 ~~years) than for non-Indigenous adults (48 per 100,000 person-years) (IRR=20.33; 95%~~

CI, 20.31-20.35;  $p<0.001$ ). Incidence rates for Indigenous town camp residents (4,042/100,000 person years) were nearly 70 times higher than amongst non-Indigenous urban residents (60/100,000 person years) (IRR=67.9, 95% CI=67.8-67.9,  $p<0.001$ ) and greater than 3 times that of either urban dwelling Indigenous adults (IRR=3.87, 95% CI=3.86-3.87,  $p<0.001$ ) or those from remote communities (IRR=3.42, 95% CI=3.42-3.42,  $p<0.001$ ) (Fig 1). The overall population-based BSI incidence rate for the Alice Springs area between 2001 and 2006 was nearly 15 more than 14 times higher for Indigenous adults (937 per 100,000 person-years) than for non-Indigenous adults (64 per 100,000 person-years) (IRR=14.62, 95% CI, 14.61, 14.65;  $p<0.001$ ). Incidence rates for Indigenous town camp residents (2,794/100,000 person-years) were more than 40 times higher than those of amongst non-Indigenous urban residents (64/100,000 person years) (IRR=43.6, 95% CI=43.57-43.65,  $p<0.001$ ) and at least three greater than 3 times higher than those of urban dwelling Indigenous adults either urban dwelling indigenous adults (IRR=3.421, 95% CI=3.418-3.423,  $p<0.001$ ) or those those from remote communities (IRR=3.87, 95% CI=3.864-3.868,  $p<0.001$ ) (Fig 1).

### Microbial Aetiology

*Escherichia coli* and *S.aureus* were the most common pathogens causing BSI in both ethnic groups. Methicillin-resistant *S.aureus* (Indigenous, 53 (5.2%); non-Indigenous, 1 (0.9%);  $p<0.001$ ) and *S.pneumoniae* (Indigenous, 136 (13.2%); non-Indigenous, 8 (5.9%);  $p<0.001$ ) were more common among Indigenous patients (Table 1).

1  
2  
3  
4  
5  
6  
7  
8  
9  
10  
11  
12  
13  
14  
15  
16  
17  
18  
19  
20  
21  
22  
23  
24  
25  
26  
27  
28  
29  
30  
31  
32  
33  
34  
35  
36  
37  
38  
39  
40  
41  
42  
43  
44  
45  
46  
47  
48  
49  
50  
51  
52  
53  
54  
55  
56  
57  
58  
59  
60

2 Risk factors for BSI were determined for pathogens contributing more than 5% of all BSI  
3 episodes (Table 2). Diabetes was more common among Indigenous patients with a  
4 *S.aureus* BSI during their final BSI admission (20.2% versus 13.5%; OR=1.6 (1.04, 2.53;  
5 p=0.03) (Table 2). In contrast, increased risk of *Streptococcus pneumoniae* BSI was  
6 associated with harmful alcohol consumption, while risk was reduced among patients  
7 with diabetes or those receiving haemodialysis (Table 2). Risk of BSI with other major  
8 pathogens (*E.coli*, *Klebsiella pneumoniae* or *Streptococcus pyogenes*) was not increased  
9 by any NCD (Table 2).

#### 10 11 12 13 14 15 16 17 18 19 20 21 22 23 24 25 26 27 28 29 30 31 32 33 34 35 36 37 38 39 40 41 42 43 44 45 46 47 48 49 50 51 52 53 54 55 56 57 58 59 60

11 *Concurrent infections*

12 During their final BSI admission, Indigenous patients more often had an additional focus  
13 of bacterial infection unrelated to the presenting BSI (Indigenous, n=69 (12.4%); non-  
14 Indigenous, n=2 (3.6%); p=0.05) (Table 1). Infections with HTLV-1 (45.2%),  
15 *S.stercoralis* (36.1%) and hepatitis B virus (anti-HBc, 62.5%; HBsAg, 12.9%) were also  
16 more common among Indigenous patients (Table 1). *Sarcoptes scabiei* infestations were  
17 only found in Indigenous patients (n=20; 4.0%) (Table 1).

#### 18 19 20 21 22 23 24 25 26 27 28 29 30 31 32 33 34 35 36 37 38 39 40 41 42 43 44 45 46 47 48 49 50 51 52 53 54 55 56 57 58 59 60

19 *Previous infections*

20 Excluding Indigenous patients who were at increased risk of recurrent infection  
21 (haemodialysis, 83; bronchiectasis, 27) and those residing outside the Alice Springs  
22 region who could not be followed-up (17), 296 of 431 (68.7%) Indigenous adults were  
23 admitted with an acute infection during the five years prior to the final BSI admission  
24 (Table 3). Significantly more common among Indigenous patients were pneumonia,

1  
2  
3  
4  
5  
6  
7  
8 previous BSI, skin abscesses and wound infections (Table 3). Predisposing factors for  
9 previous infection-related admissions included diabetes (previous skin infections),  
10 harmful alcohol consumption (previous skin infections, pneumonia and BSI) and stage 3-  
11 4 chronic kidney disease (any previous infection) (Table 4).  
12  
13  
14  
15

## 16 6

### 17 7 *Mortality*

#### 18 8 *28 day mortality*

19 Overall 28-day mortality rates following a BSI were 11.7% and 11.4% for Indigenous  
20 and non-Indigenous adults, respectively. Mortality rates among Indigenous patients were  
21 highest for town camp residents (Fig 2) and varied according to pathogen. Among the  
22 major pathogens causing BSI, most often fatal within the first 28 days was *K.pneumoniae*  
23 infection (40.0%) followed by *S.pneumoniae* (9.6%) *S.aureus* (8.0%), and *E.coli* (5.0%)  
24 ( $\chi^2=39.1$ , 4df;  $p<0.001$ ). Case fatality rates according to focus of infection were  
25 pneumonia (21.5%), pyelonephritis (8.9%) and skin infections (7.2%) ( $\chi^2=14.5$ , 3df;  
26  $p=0.002$ ).  
27  
28  
29  
30  
31  
32  
33  
34  
35  
36  
37  
38

#### 39 18 *I. Community-acquired BSI amongst Indigenous patients*

40 Non-communicable diseases including chronic liver disease, non-rheumatic heart disease  
41 and chronic kidney disease were independent predictors of death (Table 5). Relative to  
42 patients with *E.coli* BSI, both *S.aureus* (HR=2.7, 95% CI=1.0-7.3;  $p=0.05$ ) and  
43 *S.pneumoniae* (HR=13.4, 95% CI=4.6-39.2;  $p<0.001$ ) were independently associated  
44 with an increased risk of death (Table 5).  
45  
46  
47  
48  
49  
50  
51  
52  
53  
54  
55  
56  
57  
58  
59  
60



## 2. Nosocomial BSI amongst Indigenous patients

In univariate analysis, place of residence ( $p=0.04$ ) was a predictor of short-term mortality. Within the first 28 days of admission, town camp residents were more likely to die (7 of 11=64%) relative to other township (0 of 6=0.0%) or remote residents (14 of 30=46.7%) ( $p=0.039$ ). In multivariate analysis, place of residence remained an independent predictor ( $p<0.001$ ) and there was also an increased risk in those with non-rheumatic heart disease ( $HR=4.6$ , 95% CI=1.2,17.6;  $p=0.03$ ), a primary focus of pneumonia ( $HR=6.0$ , 95% CI=1.5, 24.5) and those with a previous BSI ( $HR=3.8$ , 95% CI=1.4, 10.3;  $p=0.008$ ).

## 3. Nosocomial and Community acquired BSI amongst non-Indigenous patients

In multivariate analysis, only non-rheumatic heart disease was an independent predictor of short-term mortality amongst non-indigenous patients with a community-acquired BSI ( $HR=12.5$ , 95% CI=1.0, 150.3;  $p<0.05$ ). There were 3 deaths within 28 days amongst 12 non-indigenous patients with non-rheumatic heart disease and 3 deaths amongst 56 patients without non-rheumatic heart disease. Numbers of nosocomial BSI amongst non-indigenous patients were too few ( $n=5$ ) to attempt survival analysis.

## Long-term mortality

One-hundred and forty-five (26.0%) Indigenous and 15 (27.3%) non-Indigenous patients died during the 2,056 years of follow-up at a mean  $\pm$  SD age of  $47\pm 15$  and  $68\pm 21$  years ( $p<0.001$ ), respectively. Amongst Indigenous patients, mortality rates were again highest amongst those from town camps (Log-rank  $\chi^2=5.05$ ,  $p=0.08$ ) (Fig 2).

2 Among Indigenous patients, NCDs (non-rheumatic heart disease, chronic kidney disease,  
3 chronic liver disease and malignancy) and BSI with *S.aureus* and *S.pneumoniae* were  
4 independent predictors of long-term mortality following community-acquired BSI (Table  
5 5). Residence in a town camp (town camp, 7 of 11; local residence, 0 of 6; remote areas,  
6 14 of 30;  $\chi^2=6.5$ , 2df;  $p=0.04$ ) and BSI with *K.pneumoniae* BSI (HR=4.0, 95% CI=1.5,  
7 11.2;  $p=0.007$ ) were the only univariate predictors of long-term mortality for nosocomial  
8 BSI's amongst Indigenous patients.

9  
10 There were no independent predictors of long-term mortality for non-Indigenous patients  
11 with community acquired infections and too few non-indigenous patients with  
12 nosocomial BSI's (n=5) to perform long-term survival analysis.

13

2

### 3 Discussion

4 The Indigenous adult population of central Australia has among the highest BSI  
5 incidence rates worldwide. Relative to their non-Indigenous peers, rates for Indigenous  
6 adults were ~~nearly 15420-~~fold higher overall and ~~470-fold-fold~~ higher among Indigenous  
7 town camp residents. A high burden of other infections, particularly repeated respiratory  
8 and skin infections, provide portals of entry for life-threatening invasive bacterial disease.  
9 Nearly 70% of Indigenous patients required admission for an acute infection in the  
10 preceding five years, 24.4% experienced a prior BSI and a second unrelated bacterial  
11 infection was found in 12.4% of patients. Chronic viral and parasitic infections were also  
12 common. Among Indigenous adults who were tested, more than 60% had been infected  
13 with Hepatitis B virus, 13% remained HBsAg positive, nearly half were HTLV-1  
14 seropositive and 36% were *S.stercoralis* seropositive. A similar burden of infection is  
15 experienced by Indigenous children amongst whom frequent co-infection with bacterial  
16 pathogens and parasites<sup>23</sup> contributes to 'failure-to-thrive'<sup>24</sup>. In our adult cohort, 26.0%  
17 of Indigenous patients died during the study period at a mean age of only 47 years.  
18 Although we were unable to attribute cause of death in the present study, 60% of  
19 Indigenous deaths at ASH are infection-related<sup>14</sup>.

20

21 High prevalence rates of non-communicable diseases were also found in our Indigenous  
22 cohort. These included diabetes, harmful alcohol consumption, chronic lung disease and  
23 end-stage kidney disease, all of which increase the risk of bacterial infection<sup>16,25, 15, 26</sup>.  
24 Invasive pneumococcal disease (IPD), for example, is three, 5.6 and 7-11 times more

1  
2  
3  
4  
5  
6  
7  
8  
9  
10  
11  
12  
13  
14  
15  
16  
17  
18  
19  
20  
21  
22  
23  
24  
25  
26  
27  
28  
29  
30  
31  
32  
33  
34  
35  
36  
37  
38  
39  
40  
41  
42  
43  
44  
45  
46  
47  
48  
49  
50  
51  
52  
53  
54  
55  
56  
57  
58  
59  
60

2 common among patients with diabetes<sup>15</sup>, chronic lung disease<sup>15</sup> and alcohol dependence  
3 <sup>15,27</sup>, respectively. Alcohol dependence and diabetes also increase risk of a BSI requiring  
4 intensive care nearly six-fold and haemodialysis increases risk several hundred fold <sup>26</sup>,  
5 largely due to prolonged central venous access <sup>28</sup>. In the present study, rates of diabetes  
6 among Indigenous adults were nearly three times reported background rates <sup>29</sup>. Diabetes  
7 was associated with *S.aureus* BSI and with previous skin infections, but not with  
8 *S.pneumoniae* BSI. Stage 3-4 chronic kidney disease, which is most often a complication  
9 of diabetes in our patient population<sup>30</sup>, was associated with any previous infection.  
10 Harmful alcohol consumption was associated with *S.pneumoniae* BSI and with previous  
11 infection-related admissions. Non-communicable diseases, including non-rheumatic heart  
12 disease, chronic kidney disease and chronic liver disease, were also major predictors of  
13 mortality after a BSI. However, once invasive infections were established, *S.aureus* and  
14 *S.pneumoniae* predicted death independently of any underlying medical condition.

15  
16 The present study has compared risk of non-communicable diseases among patients  
17 presenting with a BSI and cannot determine the population-based risks attributable to  
18 these conditions. Nevertheless, racial disparities in NCD prevalence are unlikely to fully  
19 account for the BSI incidence rate ratios reported here, nor do regional differences in  
20 their prevalence <sup>29</sup> explain IPD incidence rates that are twice as high among Indigenous  
21 residents of central Australia relative to those of the tropical north <sup>31</sup>. In the USA, higher  
22 IPD incidence rates among Black Americans <sup>15,32</sup> are more robustly associated with  
23 poverty than race <sup>32</sup>. An increased risk of *S.aureus* infection has also been reported  
24 among those of lower socio-economic position <sup>33-35</sup> and infection-related hospital

admissions in New Zealand are associated with social deprivation<sup>17</sup>. The socioeconomic circumstances of Indigenous Australians are therefore likely to further increase the infection risks associated with non-communicable diseases.

Social disadvantage predisposes to non-communicable diseases<sup>36, 37</sup> while increasing pathogen exposure and limiting opportunities to implement behavioural strategies that ameliorate risk<sup>38</sup>. In some Indigenous Australian communities the average number of people living per house is 17<sup>39</sup> and non-functioning health hardware leads to environmental conditions that are detrimental to householders<sup>21</sup>. Overcrowded housing<sup>40</sup> and an inability to maintain adequate skin hygiene<sup>21</sup> contribute to high rates of pyoderma. More than 40% of Indigenous patients in the present study were previously admitted with skin infections, which are the most common primary focus for *S.aureus* bacteraemia in this population<sup>41</sup>. Scabies, a recognized cause of *S.aureus* and Streptococcal pyoderma<sup>40,42</sup>, affected 4% of our cohort. Streptococcal pyoderma underlies most cases of RHD in the Northern Territory<sup>39</sup> and this was confirmed echocardiographically in 2% of our Indigenous cohort. Similarly, the transmission of respiratory pathogens is promoted by household crowding<sup>43</sup> and nearly 40% of Indigenous adults were admitted previously with pneumonia. Environmental contamination<sup>24</sup>, inadequate sanitation and unhygienic food preparation areas<sup>21</sup> contribute to infection with enteric pathogens and *S.stercoralis*. The risks of complicated strongyloidiasis, crusted scabies<sup>44</sup> and bronchiectasis<sup>13</sup> are further increased by HTLV-1 infection; however, no attempt has been made to control transmission of this virus among Indigenous Australians. [These effects are compounded by poor health literacy ; less than](#)

~~30% of Indigenous adults understood the reason for hospital admission and~~ ~~Previously we have shown that~~ Indigenous adults are less likely to engage with a conventional medical paradigm <sup>18</sup>. ~~D-and~~ delays in seeking care for uncomplicated urinary tract infections may therefore contribute to the very high gram negative BSI incidence rates reported here.

The retrospective design of this study results in a number of limitations. Firstly, only limited demographic information is collected by ASH and the Indigenous population is relatively mobile. Residents of remote communities, for example, frequently stay in town camps, and this is not recorded by ASH. The effect of town camp residence may therefore be underestimated if large numbers of remote residents acquire infection during these visits. Although foci of infection were determined by reviewing the results of microbiology and imaging for each presentation, these varied between patients according to the practice of the treating physician. The number of patients with concurrent bacterial infections and medical conditions, such as RHD, may therefore be underestimated. Similarly, seropositivity rates for infections, such as HBV and HTLV-1, could only be determined for a subset of patients. A further limitation is the identification of NCDs and previous infections using ICD-10 codes; however, coding errors are unlikely to vary systematically according to ethnicity or place of residence. The use of ICD-10 codes does, however, limit our ability to study factors that are more difficult to define and which might also influence infection risk, such as nutrition and health literacy. Finally, the present study has demonstrated an increased risk of infection and death associated with town camp residence. This occurred despite better access to health care relative to

1  
2  
3  
4  
5  
6  
7  
8  
9 2 remote residents and little difference in crude measures of socioeconomic deprivation<sup>7</sup>.  
10 3 For community-acquired BSIs, risk of death was strongly associated with NCDs;  
11 4 however, these conditions did not fully account for the increased risk following a  
12 5 nosocomial BSI. Unmeasured socioeconomic factors might contribute to increased  
13 6 mortality among town camp residents; however, recent research linking health outcomes  
14 7 to perceived racism<sup>45</sup> may also be relevant to this marginalized population.  
15  
16  
17  
18  
19  
20  
21  
22  
23  
24  
25  
26  
27  
28  
29  
30  
31  
32  
33  
34  
35  
36  
37  
38  
39  
40  
41  
42  
43  
44  
45  
46  
47  
48  
49  
50  
51  
52  
53  
54  
55  
56  
57  
58  
59  
60

9 The disease burden among the Indigenous population of central Australia is similar to  
10 that of many developing countries where NCD prevalence rates are rising rapidly in a  
11 setting of persistently high infection rates<sup>2,46</sup>. Recently, the validity of conventional  
12 health transition theory has been challenged by findings that infection-related  
13 hospitalization rates are increasing among the most socially disadvantaged community  
14 members in a developed country<sup>17</sup>. The present study provides a possible explanation for  
15 this observation and further suggests that, in contrast to the orderly epidemiological  
16 transition envisaged by Omran (1971)<sup>1</sup>, life expectancy may fall where social deprivation  
17 persists in the face of a rising prevalence of non-communicable diseases. High BSI  
18 incidence rates among Indigenous Australians were associated with a heavy burden of  
19 other infections that provide portals of entry for invasive bacterial disease. Improving life  
20 expectancy in this setting will require public health initiatives to reduce pathogen  
21 exposure in addition to controlling the burgeoning non-communicable disease burden.  
22 Diabetes, harmful alcohol consumption and organ damage resulting from these conditions  
23 increased both the likelihood of infection and the subsequent risk of death. Both  
24 conditions are included in proposed international management strategies to control the

1  
2  
3  
4  
5  
6  
7  
8  
9 2 non-communicable disease crisis<sup>37</sup>. However, our findings also illustrate the complexity  
10 3 of interactions between communicable and non-communicable diseases and support calls  
11 4 for an integrated approach to disease management<sup>47</sup>. The intimate association between  
12 5 these conditions and human behaviour renders, ~~which must include~~ the empowerment of  
13 6 affected populations to adopt protective health-related strategies behaviours critical to the  
14 7 success of any management program that reduce risk<sup>47</sup>. ~~(National Aboriginal Health~~  
15 8 ~~Strategy)~~, ~~which must include the empowerment of affected populations to promote~~  
16 9 behavioural change<sup>40</sup>.  
17  
18  
19  
20  
21  
22  
23  
24  
25  
26  
27  
28  
29  
30  
31  
32  
33  
34  
35  
36  
37  
38  
39  
40  
41  
42  
43  
44  
45  
46  
47  
48  
49  
50  
51  
52  
53  
54  
55  
56  
57  
58  
59  
60



2 **Contributions:**

3 LE designed the study, collected the data, assisted with statistical analysis and prepared  
4 the manuscript, LF and SJ collected the data, AB assisted in manuscript preparation and  
5 RW was responsible for statistical analysis and assisted in manuscript preparation.

7 **Acknowledgments:**

8 We wish to thank Dr S.Guthridge, Department of Health Gains Planning, Northern  
9 Territory Government, for providing the population data.

2 Table 1 Demographics and comorbidities for indigenous and non-indigenous BSI patients  
3 2003-2007.

|                                    | <b>Indigenous<br/>(n=558)</b> | <b>Non-<br/>indigenous<br/>(n=55)</b> | <b>p-value for<br/>difference</b> |
|------------------------------------|-------------------------------|---------------------------------------|-----------------------------------|
| Age, yrs ( $\pm$ SD)               | 44.7 $\pm$ 15.2               | 57.5 $\pm$ 21.1                       | <0.001                            |
| Gender (M/F)                       | 234/324                       | 31/23                                 | 0.03                              |
| (%)                                | (42/58)                       | (57/43)                               |                                   |
| <b>Residence</b>                   |                               |                                       |                                   |
| Urban                              | 89 (16.0)                     | 55 (100.0)                            |                                   |
| Town Camp                          | 136 (24.4)                    | 0 (0.0)                               |                                   |
| Remote Community                   | 333 (59.7)                    | 0 (0.0)                               | <0.001                            |
| <b>Co-morbidities<sup>a</sup></b>  |                               |                                       |                                   |
| Diabetes                           | 247 (44.3)                    | 11 (20.0)                             | <0.001                            |
| Harmful Alcohol Consumption        | 205 (37.0)                    | 7 (12.7)                              | <0.001                            |
| Chronic Kidney Disease             |                               |                                       |                                   |
| Stage 3-4                          | 34 (6.1)                      | 5 (9.1)                               | 0.39                              |
| Stage 5                            | 83 (14.9)                     | 3 (5.5)                               | 0.06                              |
| Chronic liver disease <sup>b</sup> | 53 (9.6)                      | 6 (10.9)                              | 0.74                              |
| Bronchiectasis                     | 27 (4.8)                      | 0                                     | 0.10                              |
| Congestive Cardiac failure         | 15 (2.7)                      | 3 (5.5)                               | 0.25                              |
| Ischaemic heart disease            | 9 (1.6)                       | 7 (15.2)                              | <0.001                            |
| Valvular Heart Disease             | 27 (4.8)                      | 3 (5.5)                               | 0.84                              |

28

|                                          |            |           |        |
|------------------------------------------|------------|-----------|--------|
| Rheumatic heart disease                  | 12 (2.0)   | 0 (0.0)   | 0.27   |
| Palliative care                          | 10 (1.8)   | 5 (9.1)   | 0.001  |
| Malignancy                               | 13 (2.3)   | 11 (20.0) | <0.001 |
| IVDU                                     | 0 (0.0)    | 3 (5.5)   | 0.001  |
| <b>Community Acquired</b>                | 510 (91.6) | 49 (90.7) | 0.84   |
| <b>Primary focus of infection</b>        |            |           |        |
| No focus                                 | 250 (44.8) | 20 (36.4) | 0.37   |
| Pneumonia <sup>c</sup>                   | 110 (19.7) | 6 (10.9)  | 0.08   |
| Skin abscess                             | 66 (11.8)  | 5 (9.1)   | 0.65   |
| Pyelonephritis <sup>d</sup>              | 63 (11.3)  | 5 (9.1)   | 0.56   |
| Other                                    | 53 (9.5)   | 18 (32.7) | <0.001 |
| Enteritis                                | 15 (2.7)   | 1 (1.8)   | 0.71   |
| Bone/joint                               | 1 (0.2)    | 0.0 (0.0) | 0.61   |
| <b>Additional Infections<sup>e</sup></b> |            |           |        |
| Acute bacterial infections               | 69 (12.4)  | 2 (3.6)   | 0.05   |
| Pneumonia                                | 18 (3.2)   | 0 (0.0)   | 0.39   |
| Urinary tract                            | 20 (3.6)   | 1 (1.8)   | 0.49   |
| Skin                                     | 27 (4.8)   | 1 (1.8)   | 0.31   |
| Enteritis                                | 4 (0.7)    | 0         | 0.53   |
| Chronic Viral infections                 |            |           |        |
| HTLV-1 <sup>f</sup>                      | 137 (45.2) | 0 (0.0)   | <0.001 |
| Hepatitis B virus <sup>f</sup>           |            |           |        |
| HBsAg                                    | 49 (12.9)  | 1 (6.7)   | 0.70   |

|                                        |            |           |        |
|----------------------------------------|------------|-----------|--------|
| Anti-HBc                               | 193 (62.5) | 3 (27.3)  | <0.001 |
| <b>Parasites</b>                       |            |           |        |
| Strongyloidiasis <sup>f</sup>          | 78 (36.1)  | 0 (0.0)   | 0.001  |
| Scabies                                | 20 (4.0)   | 0 (0.0)   | 0.24   |
| <b>Mortality</b>                       |            |           |        |
| 28 days                                | 62 (11.1)  | 7 (12.7)  | 0.72   |
| All deaths                             | 145 (26.0) | 15 (27.3) | 0.84   |
| Age of death (years)                   | 47±15      | 68±21     | <0.001 |
| <b>Major BSI Pathogens<sup>g</sup></b> |            |           |        |
|                                        | 1029       | 110       |        |
| <i>Enterobacteriaceae</i>              | 370 (36.0) | 38 (34.5) | 0.56   |
| <i>Escherichia coli</i>                | 246 (23.9) | 28 (25.5) | 0.37   |
| <i>Klebsiella pneumoniae</i>           | 57 (5.54)  | 2 (1.82)  | 0.09   |
| <i>Staphylococcus aureus</i>           | 191 (18.6) | 20 (18.2) | 0.83   |
| MRSA                                   | 53 (5.15)  | 1 (0.91)  | <0.001 |
| <i>Streptococcus pneumoniae</i>        | 136 (13.2) | 8 (5.88)  | <0.001 |
| <i>Streptococcus pyogenes</i>          | 68 (6.61)  | 8 (7.27)  | 0.42   |
| <i>Haemophilus influenzae</i>          | 22 (2.14)  | 0         | 0.14   |
| Enteric pathogens <sup>h</sup>         | 29 (2.81)  | 1 (0.91)  | 0.27   |

2 a. comorbidities determined from IC-10 discharge morbidity codes

3 b. Chronic liver disease attributed to alcohol (Indigenous, 43; non-Indigenous, 5), chronic  
 4 hepatitis B (Indigenous, 10; non-Indigenous, 0) and chronic hepatitis C (Indigenous, 0;  
 5 non-Indigenous, 3).

6 c. Chest X-rays performed for 457 Indigenous patients.

- 1  
2  
3  
4  
5  
6  
7  
8  
9 2 d. Respiratory cultures performed for 150 Indigenous patients.  
10  
11 3 e. Urine cultures performed for 310 Indigenous patients.  
12  
13 4 e. Alternative bacterial pathogen isolated.  
14  
15 5 f. Indigenous patients tested: HTLV-1, 309; HBsAg, 388; HBcAb, 309; Strongyloides  
16  
17 6 stercoralis serology, 235. Denominators exclude 6 Indigenous patients with indeterminate  
18  
19 7 HTLV-1 Western blot results and 19 Indigenous patients with borderline Strongyloides  
20  
21 8 serology whose infective status could not be determined.  
22  
23 9 f. Major BSI pathogens responsible for all recorded episodes 2001-2007.  
24  
25 10 g. Includes Salmonella spp., Shigella spp., Campylobacter spp.  
26  
27 11 Abbreviations: CHB, chronic hepatitis B virus; HCV, hepatitis C virus; IVDU,  
28  
29 12 intravenous drug use.  
30  
31  
32  
33  
34  
35  
36  
37  
38  
39  
40  
41  
42  
43  
44  
45  
46  
47  
48  
49  
50  
51  
52  
53  
54  
55  
56  
57  
58  
59  
60

Table 2. Demographic and non-communicable disease associations for the major BSI pathogens among Indigenous adults.

|                  | n   | <i>S.aureus</i> |         |                      | <i>S.pneumonia</i> |         |                      | <i>K.Pneumonia</i> |         |                      | <i>E.Coli</i> |         |                      |
|------------------|-----|-----------------|---------|----------------------|--------------------|---------|----------------------|--------------------|---------|----------------------|---------------|---------|----------------------|
|                  |     | No (%)          | Yes (%) | p-value <sup>1</sup> | No (%)             | Yes (%) | p-value <sup>1</sup> | No (%)             | Yes (%) | p-value <sup>1</sup> | No (%)        | Yes (%) | p-value <sup>1</sup> |
| <b>Residence</b> |     |                 |         |                      |                    |         |                      |                    |         |                      |               |         |                      |
| Urban            | 89  | 86.5            | 13.5    |                      | 89.9               | 10.1    |                      | 96.6               | 3.4     |                      | 76.4          | 23.6    |                      |
| Town Camp        | 136 | 88.2            | 11.8    |                      | 83.1               | 16.9    |                      | 91.9               | 8.1     |                      | 73.5          | 26.5    |                      |
| Remote           | 333 | 80.5            | 19.5    | 0.08                 | 89.2               | 10.8    | 0.15                 | 94.6               | 5.4     | 0.30                 | 73.0          | 27.0    | 0.81                 |
| <b>Diabetes</b>  |     |                 |         |                      |                    |         |                      |                    |         |                      |               |         |                      |
| No               | 310 | 86.5            | 13.6    |                      | 83.9               | 16.1    |                      | 93.9               | 6.1     |                      | 74.1          | 25.8    |                      |
| Yes              | 247 | 79.8            | 20.2    | <b>0.035</b>         | 92.7               | 7.3     | <b>0.002</b>         | 94.7               | 5.3     | 0.66                 | 72.9          | 27.1    | 0.73                 |
| <b>CRF</b>       |     |                 |         |                      |                    |         |                      |                    |         |                      |               |         |                      |
| No               | 524 | 83.4            | 16.6    |                      | 87.6               | 12.4    |                      | 94.3               | 5.7     |                      | 73.7          | 26.3    |                      |
| Yes              | 34  | 82.4            | 17.7    | 0.87                 | 91.2               | 8.8     | 0.54                 | 94.1               | 5.9     | 0.97                 | 73.5          | 26.5    | 0.99                 |

32

|                |     |      |      |      |      |      |        |      |     |      |      |      |        |
|----------------|-----|------|------|------|------|------|--------|------|-----|------|------|------|--------|
| <b>HD</b>      |     |      |      |      |      |      |        |      |     |      |      |      |        |
| No             | 475 | 84.2 | 15.8 |      | 86.3 | 13.7 |        | 94.1 | 5.9 |      | 70.5 | 29.5 |        |
| Yes            | 83  | 78.3 | 21.7 | 0.18 | 96.4 | 3.6  | 0.01   | 95.2 | 4.8 | 0.70 | 92.6 | 8.4  | <0.001 |
| <b>CLD</b>     |     |      |      |      |      |      |        |      |     |      |      |      |        |
| No             | 505 | 82.4 | 17.6 |      | 87.7 | 12.3 |        | 93.9 | 6.1 |      | 73.5 | 26.5 |        |
| Yes            | 53  | 92.5 | 7.6  | 0.06 | 88.7 | 11.3 | 0.84   | 98.1 | 1.9 | 0.20 | 75.6 | 24.5 | 0.75   |
| <b>Alcohol</b> |     |      |      |      |      |      |        |      |     |      |      |      |        |
| No             | 349 | 82.2 | 17.8 |      | 92.0 | 8.0  |        | 95.1 | 4.9 |      | 75.1 | 24.9 |        |
| Yes            | 205 | 84.9 | 15.1 | 0.42 | 80.5 | 19.5 | <0.001 | 93.1 | 6.8 | 0.33 | 71.7 | 28.3 | 0.38   |

Major BSI pathogens recorded during the 5 years period prior to the final BSI admission. Abbreviations: Alcohol, harmful alcohol consumption; CRF, stage 3 or 4 chronic renal disease; HD, stage 5 renal disease; CLD, chronic liver disease.

Table 3. Infections recorded for Indigenous and non-Indigenous adults during the 5 years prior to the final BSI presentation<sup>a</sup>

|                          | Indigenous<br>n=431 (%) | Non-Indigenous<br>(n=52) | p-value |
|--------------------------|-------------------------|--------------------------|---------|
| Any                      | 296 (68.7)              | 18 (34.6)                | <0.001  |
| BSI                      | 105 (24.4)              | 4 (7.7)                  | 0.007   |
| <i>Respiratory Tract</i> | 179 (41.5)              | 3 (5.8)                  | <0.001  |
| Pneumonia                | 164 (38.1)              | 4 (7.7)                  | <0.001  |
| >3 episodes              | 32 (7.4)                | 0 (0.0)                  | 0.04    |
| Exacerbation BE          | 13 (6.0)                | 0 (0.0)                  | 0.20    |
| <i>Skin/Soft Tissue</i>  | 154 (35.7)              | 7 (13.5)                 | 0.001   |
| <i>Infections</i>        |                         |                          |         |
| Abscess                  | 88 (20.5)               | 0 (0.0)                  | <0.001  |
| Cellulitis               | 47 (10.9)               | 7 (13.7)                 | 0.55    |
| Wound infection          | 42 (9.7)                | 0 (0.0)                  | 0.02    |
| <i>Pyelonephritis</i>    | 77 (17.9)               | 4 (7.7)                  | 0.06    |
| <i>Bone/joint</i>        | 11 (2.6)                | 0 (0.0)                  | 0.24    |
| <i>Enteritis</i>         | 21 (4.9)                | 1 (1.9)                  | 0.33    |
| <i>Scabies</i>           | 14 (3.3)                | 0 (0.0)                  | 0.19    |
| <i>Other</i>             | 6 (1.4)                 | 0 (0.0)                  | 0.39    |

a. Excluding haemodialysis patients (n=83 indigenous, 3 non-indigenous), patients with bronchiectasis (n=27) and those residing outside the Alice Springs urban and rural districts for whom data were not available (Indigenous, 18; non-Indigenous, 0).

Abbreviations: BSI, blood stream infections; BE, bronchiectasis.



Table 4: Multivariate adjusted odds ratios for previous infections among Indigenous patients<sup>a</sup>

|                      | <b>Any infection</b><br>(n=470) <sup>b</sup> | <b>BSI</b><br>(n=553) | <b>Skin<sup>b</sup></b><br>(n=470) | <b>Pneumonia<sup>c</sup></b><br>(n=443) |
|----------------------|----------------------------------------------|-----------------------|------------------------------------|-----------------------------------------|
|                      | <b>Odds ratio</b>                            | <b>Odds ratio</b>     | <b>Odds ratio</b>                  | <b>Odds ratio</b>                       |
|                      | <b>(95% CI)</b>                              | <b>(95% CI)</b>       | <b>(95% CI)</b>                    | <b>(95% CI)</b>                         |
| <b>Residence</b>     |                                              |                       |                                    |                                         |
| Urban                | 1.00                                         | 1.00                  | 1.00                               | 1.00                                    |
| Town camp            | 1.2 (0.6-2.4)                                | 1.8 (0.9-3.4)         | 1.3 (0.7-2.5)                      | 1.3 (0.7-2.6)                           |
| Remote               | 0.8 (0.5-1.4)                                | 1.3 (0.7-2.3)         | 1.2 (0.7-2.2)                      | 0.8 (0.4-1.4)                           |
| Age (10 yrs)         | 0.9 (0.8-1.0)                                | 1.1 (0.9-1.2)         | 0.9 (0.8-1.0)                      | 1.0 (0.9-1.2)                           |
| Gender (0=F,<br>1=M) | 1.0 (0.7-1.5)                                | 1.3 (0.9-1.9)         | 1.0 (0.7-1.6)                      | 1.0 (0.7-1.6)                           |
| Diabetes             | 1.4 (0.9-2.2)                                | 1.1 (0.7-1.7)         | <b>2.1 (1.4-3.3)</b>               | 1.1 (0.7-1.7)                           |
| CRF                  | <b>3.0 (1.1-8.2)</b>                         | 1.7 (0.8-3.8)         | 1.5 (0.7-3.2)                      | 1.6 (0.7-3.7)                           |
| Alcohol              | <b>2.8 (1.8-4.4)</b>                         | <b>1.7 (1.1-2.5)</b>  | <b>1.7 (1.1-2.6)</b>               | <b>4.3 (2.8-6.7)</b>                    |

1  
2  
3  
4  
5  
6  
7  
8  
9  
10  
11  
12  
13  
14  
15  
16  
17  
18  
19  
20  
21  
22  
23  
24  
25  
26  
27  
28  
29  
30  
31  
32  
33  
34  
35  
36  
37  
38  
39  
40  
41  
42  
43  
44  
45  
46  
47  
48  
49  
50  
51  
52  
53  
54  
55  
56  
57  
58  
59  
60

a. Previous infections during 5 years prior to the final BSI in the study period. Adjusted for other risk factors in table.

b. Excluding patients receiving haemodialysis.

c. Excluding patients receiving haemodialysis and those with bronchiectasis

Abbreviations: BSI, blood stream infections; CRF, chronic renal failure excluding patients receiving haemodialysis.

For peer review only

Table 5: Multivariate analysis of factors associated with 28 day and long-term survival for 510 Indigenous patients following a Community-acquired Blood Stream Infection<sup>a</sup>.

|                   | n         | Deaths    |       | 28 day survival      |              | Long-term survival   |                  |
|-------------------|-----------|-----------|-------|----------------------|--------------|----------------------|------------------|
|                   |           | (28 days) | (all) | HR (95% CI)          | p-value      | HR (95% CI)          | p-value          |
| Residence         |           |           |       |                      |              |                      |                  |
| Urban             | 63        | 7         | 20    | 1.00                 |              | 1.0                  |                  |
| Town Camp         | 125       | 20        | 37    | 1.7 (0.7-4.1)        |              | 1.2 (0.7-2.2)        |                  |
| Remote            | 302       | 22        | 67    | 0.9 (0.4-2.0)        | 0.12         | 0.9 (0.5-1.5)        | 0.28             |
| Age (10yrs)       |           |           |       | 1.04 (0.8-1.3)       | 0.70         | 1.0 (0.9-1.1)        | 0.99             |
| Gender (0=F,1=M)  | 298F/212M | 23/26     | 65/59 | 1.5 (0.8-2.7)        | 0.17         | 1.3 (0.9-2.0)        | 0.13             |
| CLD (0=No, 1=Yes) | 41        | 11        | 20    | <b>3.3 (1.6-6.7)</b> | <b>0.001</b> | <b>2.5 (1.5-4.2)</b> | <b>&lt;0.001</b> |
| Non-RHD           | 37        | 9         | 16    | <b>2.9 (1.4-6.2)</b> | <b>0.005</b> | <b>2.1 (1.2-3.6)</b> | <b>0.01</b>      |
| CRF               | 28        | 6         | 11    | <b>2.6 (1.0-6.5)</b> | <b>0.04</b>  | <b>2.3 (1.2-4.3)</b> | <b>0.01</b>      |

|                       |     |    |    |                        |                  |                       |                  |
|-----------------------|-----|----|----|------------------------|------------------|-----------------------|------------------|
| Malignancy            | 11  | 3  | 10 | 2.9 (0.9-9.9)          | 0.09             | <b>6.0 (3.0-12.4)</b> | <b>&lt;0.001</b> |
| Organism <sup>b</sup> |     |    |    |                        |                  |                       |                  |
| <i>E.coli</i>         | 143 | 5  | 22 | 1.0                    |                  | 1.0                   |                  |
| <i>S.aureus</i>       | 83  | 7  | 18 | <b>2.7 (1.0-7.3)</b>   | <b>0.05</b>      | <b>1.8 (1.1-3.0)</b>  | <b>0.03</b>      |
| <i>K.pneumoniae</i>   | 29  | 12 | 15 | 2.3 (0.7-7.5)          | 0.17             | 1.4 (0.7-2.7)         | 0.17             |
| <i>S.pneumoniae</i>   | 67  | 5  | 17 | <b>13.4 (4.6-39.2)</b> | <b>&lt;0.001</b> | <b>4.8 (2.5-9.5)</b>  | <b>&lt;0.001</b> |
| <i>Other</i>          | 188 | 20 | 52 | 1.8 (0.5-6.3)          | 0.37             | 1.5 (0.8-3.0)         | 0.22             |

a. Excluded from analysis: 48 Nosocomial infections.

b. Pathogens isolated from blood cultures

Abbreviations: BSI, blood stream infection; CCF; CLD, chronic liver disease; CRF, chronic renal failure; Non-RHD, ischaemic heart disease and cardiac failure.

1  
2  
3  
4  
5  
6  
7  
8  
9  
10  
11  
12  
13  
14  
15  
16  
17  
18  
19  
20  
21  
22  
23  
24  
25  
26  
27  
28  
29  
30  
31  
32  
33  
34  
35  
36  
37  
38  
39  
40  
41  
42  
43  
44  
45  
46  
47  
48  
49  
50  
51  
52  
53  
54  
55  
56  
57  
58  
59  
60  

## 1 References

- 2 1. Omran A. A theory of the epidemiology of population change. *Milbank Mem*  
3 *Fund Q.* 1971;49:509-538.
- 4 2. Maher D, Smeeth, L., Sekajugo, J. Health transition in Africa: practical policy  
5 proposals for primary care. *Bull WHO.* 2010;88:943-948.
- 6 3. Gracey M, King, M. Indigenous Health part 1: determinants and disease patterns.  
7 *Lancet.* 2009;374:65-75.
- 8 4. Frenk J, Bobadilla, JL., Sepulveda J., Cervantes, ML. Health transition in middle-  
9 income countries: new challenges for health care. *Health Policy and Planning.*  
10 1989;4(1):29-39.
- 11 5. Heuveline P, Guillot, M., Gwatkin, DR. The uneven tide of the health transition.  
12 *Soc Sci Med.* 2002;55:313-322.
- 13 6. [United Nations.](#) *State of the World's Indigenous Peoples.* New York: The United  
14 Nations Department of Economic and Social Affairs; 2009.
- 15 7. [Australian Bureau of Statistics.](#) *The health and welfare of Australia's Aboriginal*  
16 *and Torres Strait Islander peoples.* Canberra; 2005.
- 17 8. Zhao Y, Dempsey, K. Causes of inequality in life expectancy between indigenous  
18 and non-indigenous people in the Northern Territory, 1981-2000: a decomposition  
19 study. *Med J Aust.* 2006;184:490-494.
- 20 9. [Australian Bureau of Statistics.](#) *The Health and Welfare of Australia's Aboriginal*  
21 *and Torres Strait Islander Peoples.* Canberra: Australia; 2010.  
22 [www.censusdata.abs.gov.au/census\\_services/getproduct/census/2011/community](http://www.censusdata.abs.gov.au/census_services/getproduct/census/2011/community)  
23 [profile/IARE701002?opendocument&navpos=230](http://www.censusdata.abs.gov.au/census_services/getproduct/census/2011/community)
- 24 10. Davis J, Cheng, AC., McMillan, M., Humphrey, AB., Stephens, DP., Anstey,  
25 NM. Sepsis in the tropical Top End of Australia's Northern Territory: disease  
26 burden and impact on Indigenous Australians. *Med J Aust.* 2011;194:519-524.
- 27 11. Einsiedel L, Woodman, RJ. Two Nations: racial disparities in bloodstream  
28 infections recorded at Alice Springs Hospital, central Australia, 2001-2005. *Med J*  
29 *Aust.* 2010;192:567-571.
- 30 12. O'Grady K, Taylor-Thompson, D., Chang, A., Torzillo, P., Morris, P., Mackenzie,  
31 G., Wheaton, G., Bauert, P., De Campo, M., De Campo, J., Ruben, A. Rates of  
32 radiologically confirmed pneumonia as defined by the World Health Organisation  
33 in Northern Territory Indigenous children. *Med J Aust.* 2010;192(10):592-595.
- 34 13. Einsiedel L, Fernandes, L., Spelman, T., Steinfort, D., Gotuzzo, E. Bronchiectasis  
35 is associated with Human T Lymphotropic Virus 1 infection in an Indigenous  
36 Australian population. *Clin Infect Dis.* 2012;54(1):43-50.
- 37 14. Einsiedel L, Fernandes, L., Woodman, R. . Racial disparities in infection-related  
38 mortality at Alice Springs Hospital, central Australia, 2000-2005. *Med J Aust.*  
39 2008;188:568-571.
- 40 15. Kway M, Rose, CE., Fry, AM., Singleton, JA., Moore, Z., Zell, ER., Whitney,  
41 CG. The influence of chronic illness on the incidence of invasive pneumococcal  
42 disease in adults. *Clin Infect Dis.* 2005;192:377-386.
- 43 16. Joshi N, Caputo, GM., Weitekamp, MR., Karchmer, AW. Infections in diabetic  
44 patients. *N. Engl. J. Med.* 1999;341(25):1906-1912.

17. Baker M, Barnard, LT., Kvalsvig, A., Verrall, A., Zhang, J., Keall, M., Wilson, N., Wall, T., Howden-Chapman, P. Increasing incidence of serious infectious diseases and inequalities in New Zealand: a national epidemiological study. *Lancet*. 2012;379:1112-1119.
18. Einsiedel L, van Iersel, E., Macnamara, R., Spelman, T., Heffernan, M., Bray, L, Morris, H., Porter, B., Davis, A. Self-Discharge by adult Aboriginal patients at Alice Springs Hospital, central Australia: insights from a prospective cohort study. *Aust Health Rev*. 2012.
19. [Australian Bureau of Statistics](http://www.abs.gov.au/AUSSTATS/abs@.nsf/lookup/4704.0Chapter218Oct+2010). 2011 Census of population and Housing. Aboriginal and Torres Strait Islander (Indigenous) Profile. Canberra; 2013. 2002.0.
20. Skov S, Chikrizhs, TN., Li SQ., Pircher, S., Whetton, S. How much is too much? Alcohol consumption and related harm in the Northern Territory. *Med J Aust*. 2010;193:269-272.
21. Bailie R, Runcie, MJ. Household infrastructure in Aboriginal communities and the implications for health improvement. *Med J Aust*. 2001;175:363-366.
22. Anaya J. Report of the Special Rapporteur on the situation of human rights and fundamental freedoms of indigenous peoples, James Anaya, on the situation of indigenous people in Australia. United Nations; 2010.
23. d'Espaignet E, Kennedy, K., Paterson, B., Measey, M. *Health Status in the Northern Territory 1998*. Darwin: Epidemiology, Primary Care and Coordinated Care Branch;1998.
24. McDonald E, Bailie, R., Grace, J., Brewster, D. An ecological approach to health promotion in remote Australian Aboriginal communities. *Health Promotion International*. 2010;25(1):42-53.
25. O'Brien J, Lu, B., Ali, NA., Martin, GS., Aberegg, SK., Marsh, CB., Lemeshow, S., Douglas, IS. Alcohol dependence is independently associated with sepsis, septic shock and hospital mortality among adult intensive care unit patients. *Crit Care Med*. 2007;35(2):345-350.
26. Laupland K, Gregson, DB., Zygun, DA., Doig, CJ., Mortis, G., Church, DL. Severe blood stream infections: a population-based assessment. *Crit Care Med*. 2004;32:992-997.
27. Nuori J, Butler, JC., Farley, MM., Harrison, LH., McGeer, A., Kolczak, MS., Breiman, RF. Cigarette smoking and invasive pneumococcal disease. *N Engl J Med*. 2000;342:681-689.
28. Dopirak M, Hill, C., Oleksiw, M., Dumigan, D., Arvai, J., English, E., Carusillo, E., Malo-Schlegel, S., Richo, J., Traficanti, K., Welch, B., Cooper, B. Surveillance of hemodialysis-associated primary bloodstream infections: the experience of ten hospital-based centers. *Infect Control Hosp Epidemiol*. 2002;23:721-724.
29. Zhao Y, Connors, C., Wright, J., Guthridge, S. Estimating chronic disease prevalence among the remote Aboriginal population of the Northern Territory using multiple data sources. *Aust NZ J Public Health*. 2008;32:307-313.
30. Hoy W, Davey, RL., Sharma, S., Hoy, PW., Smith, JM., Kondalsamy-Chennakesavan, S. Chronic disease profiles in remote Aboriginal settings and

- 1 implications for health services planning. *Aust NZ J Public Health*. 2010;34:11-18.
- 2
- 3 31. Moberley S, Krause, V., Cook, H., Mulholland, K., Carapetis, J., Torzillo, P.,
- 4 Andrews, R. Failure to vaccinate or failure of vaccine? Effectiveness of the 23-
- 5 valent pneumococcal polysaccharide vaccine program in Indigenous adults in the
- 6 Northern Territory of Australia. *Vaccine*. 2010;28:2296-2301.
- 7 32. Flory J, Joffe, M., Fishman, NO., Edelstein, PH., Metlay, JP. Socioeconomic risk
- 8 factors for bacteraemic pneumococcal pneumonia in adults. *Epidemiol Infect*.
- 9 2009;137:717-726.
- 10 33. Tong S, Bishop, E., Lilliebridge, R., Cheng, A., Spasova-Penkova, Z., Holt, D.,
- 11 Giffard, P., McDonald, M., Currie, B., Boutlis, C. Community Associated strains
- 12 of Methicillin-Resistant *Staphylococcus aureus* and Methicillin-Susceptible
- 13 *S.aureus* in Indigenous Northern Australia: Epidemiology and Outcomes. *J Infect*
- 14 *Dis*. 2009;199:1461-1470.
- 15 34. Huggan P, Wells, JE., Browne, M., Richardson, A., Murdoch, DR., Chambers,
- 16 ST. Population-based epidemiology of *Staphylococcus aureus* bloodstream
- 17 infection in Canterbury, New Zealand. *Int Med J*. 2010;40:117-125.
- 18 35. Bagger J, Zindrou, D., Taylor, KM. Post-operative infection with Methicillin-
- 19 resistant *Staphylococcus aureus* and socioeconomic background. *Lancet*.
- 20 2004;363:706-708.
- 21 36. Marmot M, Friel, S., Bell, R., Houweling, T., Taylor, S. Closing the gap in a
- 22 generation: health equity through action on the social determinants of health.
- 23 *Lancet*. 2008;372(November 8):1661-1669.
- 24 37. Beaglehole R, Bonita, R., Horton, R., Adams, C., Alleyne, G., Asaria, P. et al for
- 25 the Lancet NCD action group and the NCD alliance. Priority actions for the non-
- 26 communicable disease crisis. *Lancet*. 2011;377:1438-1447.
- 27 38. Bailie R, Stevens, MR., McDonald, E., Halpin, S., Brewster, D., Robinson, G.,
- 28 Guthridge, S. Skin infection, housing and social circumstances in children living
- 29 in remote Indigenous communities: testing conceptual and methodological
- 30 approaches. *BMC public health*. 2005;5.
- 31 39. McDonald M, Towers, RJ., Andrews, RM., Bengler, N., Currie, BJ., Carapetis, JR.
- 32 Low rates of streptococcal pharyngitis and high rates of pyoderma in Australian
- 33 Aboriginal communities where acute rheumatic fever is hyperendemic. *Clin Infect*
- 34 *Dis*. 2006;43:683-689.
- 35 40. Currie B, Carapetis, JR. Skin infections and infestations in Aboriginal
- 36 communities in northern Australia. *Aust J Dermatol*. 2000;41:139-145.
- 37 41. Hewagama S, Spelman, T., Einsiedel, L. *Staphylococcus aureus* bacteraemia at
- 38 Alice Springs Hospital, central Australia, 2003-2006. *Int Med J*. 2012;42:505-
- 39 512.
- 40 42. Carapetis J, Wolff, DR., Currie, BJ. Acute rheumatic fever and rheumatic heart
- 41 disease in the Top End of Australia's Northern Territory. *Med J Aust*. 1996;164(5
- 42 February):146-149.
- 43 43. Jacoby P, Carvillo, K., Hall, S., Riley, T., Bowman, J., Leach, A., Lehman, D.,
- 44 Kalgoolie Otitis Media Resarch Project Team. Crowding and other strong
- 45 predictors of upper respiratory carriage of otitis media related bacteria in

- 1  
2  
3  
4  
5  
6  
7  
8  
9 1 Australian Aboriginal and non-Aboriginal children. *Paed Inf Dis J*.  
10 2 2011;30(6):480-485.  
11 3 44. Verdonck K, Gonzalez, E., Van Dooren, S., Vandamme, A., Vanham, G.,  
12 4 Gotuzzo, E. Human T-lymphotropic virus 1: recent knowledge about an ancient  
13 5 infection. *Lancet Infect Dis*. 2007;7:266-281.  
14 6 45. Priest N, Paradies, Y., Stevens, M., Bailie, R. Exploring relationships between  
15 7 racism, housing and child illness in remote indigenous communities. *J Epidemiol*  
16 8 *Community Health* 2012;66:440-447.  
17 9 46. Boutayeb A, Boutayeb, B. The burden of non-communicable diseases in  
18 10 developing countries. *Int J Equity in Health*. 2005;4(1):2.  
19 11 47. De Maeseneer J, Roberts RG, Demarzo M, et al. Tackling NCDs: a different  
20 12 approach is needed. *The Lancet*. 2012;379(9829):1860-1861.  
21 13  
22 14



1  
2  
3  
4  
5  
6  
7  
8  
9  
10  
11  
12  
13  
14  
15  
16  
17  
18  
19  
20  
21  
22  
23  
24  
25  
26  
27  
28  
29  
30  
31  
32  
33  
34  
35  
36  
37  
38  
39  
40  
41  
42  
43  
44  
45  
46  
47  
48  
49  
50  
51  
52  
53  
54  
55  
56  
57  
58  
59  
60

Figure 1. Blood stream infection incidence rates according to ethnicity and place of residence.

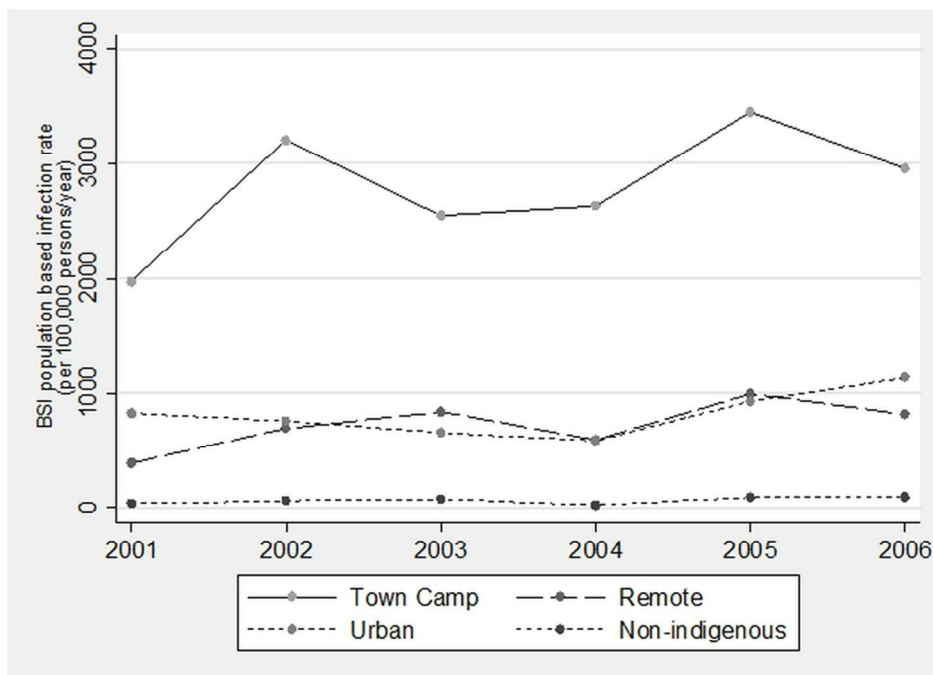

Blood Stream infection incidence rates according to ethnicity and place of residence. Town Camp, Indigenous residents of Town Camp; Urban, Indigenous residents of township who do not reside in a town camp; Remote, Indigenous residents of remote Indigenous communities. Non-Indigenous residents of Alice Springs region.

92x90mm (300 x 300 DPI)

only

Fig 2. Survival of Indigenous adults following a blood stream infection according to place of residence.

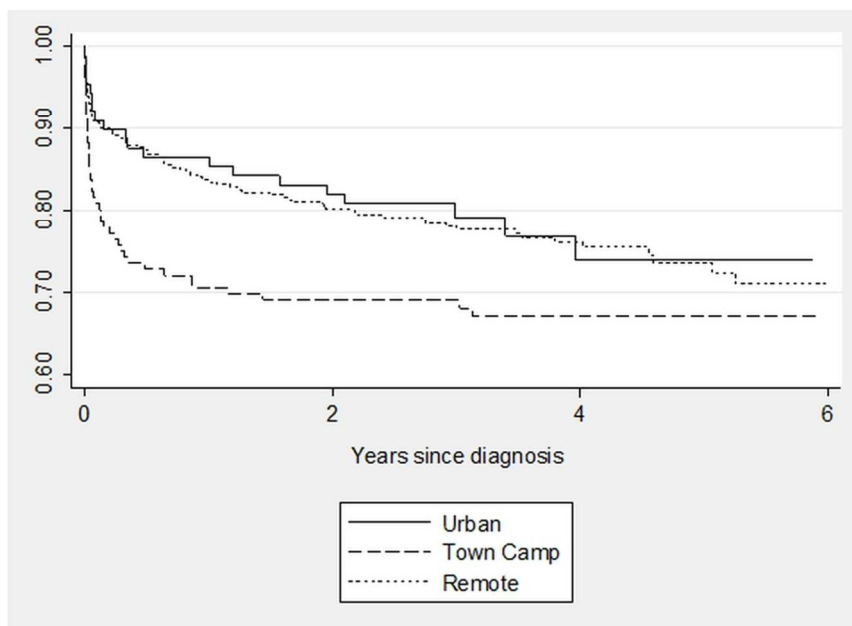

Survival following the final BSI recorded during the study period according to place of residence. Urban, residence within the township, but not in a town camp; Town Camp, residence in a town camp within the township; Remote, residence in a remote Indigenous community. Median follow-up time for all Indigenous subjects was 3.23 years and for Urban, Town camp and Remote subjects was 2.99, 3.04 and 3.38 years, respectively.

90x94mm (300 x 300 DPI)

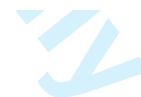

## STROBE Statement—checklist of items that should be included in reports of observational studies

|                              | Item No | Recommendation                                                                                                                                                                                                                                                                                                                                                                                                                                                                                                                                                                                                                                                                                   |
|------------------------------|---------|--------------------------------------------------------------------------------------------------------------------------------------------------------------------------------------------------------------------------------------------------------------------------------------------------------------------------------------------------------------------------------------------------------------------------------------------------------------------------------------------------------------------------------------------------------------------------------------------------------------------------------------------------------------------------------------------------|
| <b>Title and abstract</b>    | 1       | (a) Indicate the study's design with a commonly used term in the title or the abstract<br>(b) Provide in the abstract an informative and balanced summary of what was done and what was found                                                                                                                                                                                                                                                                                                                                                                                                                                                                                                    |
| <b>Introduction</b>          |         |                                                                                                                                                                                                                                                                                                                                                                                                                                                                                                                                                                                                                                                                                                  |
| Background/rationale         | 2       | Explain the scientific background and rationale for the investigation being reported                                                                                                                                                                                                                                                                                                                                                                                                                                                                                                                                                                                                             |
| Objectives                   | 3       | State specific objectives, including any prespecified hypotheses                                                                                                                                                                                                                                                                                                                                                                                                                                                                                                                                                                                                                                 |
| <b>Methods</b>               |         |                                                                                                                                                                                                                                                                                                                                                                                                                                                                                                                                                                                                                                                                                                  |
| Study design                 | 4       | Present key elements of study design early in the paper                                                                                                                                                                                                                                                                                                                                                                                                                                                                                                                                                                                                                                          |
| Setting                      | 5       | Describe the setting, locations, and relevant dates, including periods of recruitment, exposure, follow-up, and data collection                                                                                                                                                                                                                                                                                                                                                                                                                                                                                                                                                                  |
| Participants                 | 6       | (a) <i>Cohort study</i> —Give the eligibility criteria, and the sources and methods of selection of participants. Describe methods of follow-up<br><i>Case-control study</i> —Give the eligibility criteria, and the sources and methods of case ascertainment and control selection. Give the rationale for the choice of cases and controls<br><i>Cross-sectional study</i> —Give the eligibility criteria, and the sources and methods of selection of participants<br>(b) <i>Cohort study</i> —For matched studies, give matching criteria and number of exposed and unexposed<br><i>Case-control study</i> —For matched studies, give matching criteria and the number of controls per case |
| Variables                    | 7       | Clearly define all outcomes, exposures, predictors, potential confounders, and effect modifiers. Give diagnostic criteria, if applicable                                                                                                                                                                                                                                                                                                                                                                                                                                                                                                                                                         |
| Data sources/<br>measurement | 8*      | For each variable of interest, give sources of data and details of methods of assessment (measurement). Describe comparability of assessment methods if there is more than one group                                                                                                                                                                                                                                                                                                                                                                                                                                                                                                             |
| Bias                         | 9       | Describe any efforts to address potential sources of bias                                                                                                                                                                                                                                                                                                                                                                                                                                                                                                                                                                                                                                        |
| Study size                   | 10      | Explain how the study size was arrived at                                                                                                                                                                                                                                                                                                                                                                                                                                                                                                                                                                                                                                                        |
| Quantitative variables       | 11      | Explain how quantitative variables were handled in the analyses. If applicable, describe which groupings were chosen and why                                                                                                                                                                                                                                                                                                                                                                                                                                                                                                                                                                     |
| Statistical methods          | 12      | (a) Describe all statistical methods, including those used to control for confounding<br>(b) Describe any methods used to examine subgroups and interactions<br>(c) Explain how missing data were addressed<br>(d) <i>Cohort study</i> —If applicable, explain how loss to follow-up was addressed<br><i>Case-control study</i> —If applicable, explain how matching of cases and controls was addressed<br><i>Cross-sectional study</i> —If applicable, describe analytical methods taking account of sampling strategy<br>(e) Describe any sensitivity analyses                                                                                                                                |

Continued on next page

**Results**

|                  |     |                                                                                                                                                                                                                                                                                                                                                                                                               |
|------------------|-----|---------------------------------------------------------------------------------------------------------------------------------------------------------------------------------------------------------------------------------------------------------------------------------------------------------------------------------------------------------------------------------------------------------------|
| Participants     | 13* | (a) Report numbers of individuals at each stage of study—eg numbers potentially eligible, examined for eligibility, confirmed eligible, included in the study, completing follow-up, and analysed<br>(b) Give reasons for non-participation at each stage<br>(c) Consider use of a flow diagram                                                                                                               |
| Descriptive data | 14* | (a) Give characteristics of study participants (eg demographic, clinical, social) and information on exposures and potential confounders<br>(b) Indicate number of participants with missing data for each variable of interest<br>(c) <i>Cohort study</i> —Summarise follow-up time (eg, average and total amount)                                                                                           |
| Outcome data     | 15* | <i>Cohort study</i> —Report numbers of outcome events or summary measures over time<br><i>Case-control study</i> —Report numbers in each exposure category, or summary measures of exposure<br><i>Cross-sectional study</i> —Report numbers of outcome events or summary measures                                                                                                                             |
| Main results     | 16  | (a) Give unadjusted estimates and, if applicable, confounder-adjusted estimates and their precision (eg, 95% confidence interval). Make clear which confounders were adjusted for and why they were included<br>(b) Report category boundaries when continuous variables were categorized<br>(c) If relevant, consider translating estimates of relative risk into absolute risk for a meaningful time period |
| Other analyses   | 17  | Report other analyses done—eg analyses of subgroups and interactions, and sensitivity analyses                                                                                                                                                                                                                                                                                                                |

**Discussion**

|                  |    |                                                                                                                                                                            |
|------------------|----|----------------------------------------------------------------------------------------------------------------------------------------------------------------------------|
| Key results      | 18 | Summarise key results with reference to study objectives                                                                                                                   |
| Limitations      | 19 | Discuss limitations of the study, taking into account sources of potential bias or imprecision. Discuss both direction and magnitude of any potential bias                 |
| Interpretation   | 20 | Give a cautious overall interpretation of results considering objectives, limitations, multiplicity of analyses, results from similar studies, and other relevant evidence |
| Generalisability | 21 | Discuss the generalisability (external validity) of the study results                                                                                                      |

**Other information**

|         |    |                                                                                                                                                               |
|---------|----|---------------------------------------------------------------------------------------------------------------------------------------------------------------|
| Funding | 22 | Give the source of funding and the role of the funders for the present study and, if applicable, for the original study on which the present article is based |
|---------|----|---------------------------------------------------------------------------------------------------------------------------------------------------------------|

\*Give information separately for cases and controls in case-control studies and, if applicable, for exposed and unexposed groups in cohort and cross-sectional studies.

**Note:** An Explanation and Elaboration article discusses each checklist item and gives methodological background and published examples of transparent reporting. The STROBE checklist is best used in conjunction with this article (freely available on the Web sites of PLoS Medicine at <http://www.plosmedicine.org/>, Annals of Internal Medicine at <http://www.annals.org/>, and Epidemiology at <http://www.epidem.com/>). Information on the STROBE Initiative is available at [www.strobe-statement.org](http://www.strobe-statement.org).
